JX iTRAQ

1 **Regional protein expression in human Alzheimer's brain correlates with**  
2 **disease severity**

3

4 Jingshu Xu<sup>1,2</sup>, Stefano Patassini<sup>1,2</sup>, Nitin Rustogi<sup>1</sup>, Isabel Riba-Garcia<sup>1</sup>, Benjamin D. Hale<sup>1</sup>,  
5 Alexander M Phillips<sup>3</sup>, Henry Waldvogel<sup>4</sup>, Robert Haines<sup>5</sup>, Phil Bradbury<sup>5</sup>, Adam Stevens<sup>6</sup>,  
6 Richard L. M. Faull<sup>4</sup>, Andrew W. Dowsey<sup>1,7</sup>, Garth J. S. Cooper<sup>1,2,4</sup>, and Richard D. Unwin<sup>1\*</sup>

7

8 <sup>1</sup> Division of Cardiovascular Sciences, School of Medical Sciences, Faculty of Biology,  
9 Medicine and Health, The University of Manchester, Manchester, M13 9WL and Centre for  
10 Advanced Discovery and Experimental Therapeutics (CADET), Central Manchester  
11 University Hospitals NHS Foundation Trust, Manchester Academic Health Sciences Centre,  
12 Manchester, UK

13 <sup>2</sup> School of Biological Sciences, and Maurice Wilkins Centre for Molecular Biodiscovery,  
14 Faculty of Science, University of Auckland, New Zealand.

15 <sup>3</sup> Department of Electrical Engineering and Electronics, University of Liverpool, Liverpool,  
16 L69 3GJ, UK

17 <sup>4</sup> Centre for Brain Research, Faculty of Medical and Health Sciences, University of  
18 Auckland, Auckland, New Zealand.

19 <sup>5</sup> Research IT, The University of Manchester, Manchester, UK.

20 <sup>6</sup> Division of Developmental Biology & Medicine, School of Medical Sciences, Faculty of  
21 Biology, Medicine and Health, University of Manchester, Manchester, M13 9PL, UK.

22 <sup>7</sup> School of Social & Community Medicine and School of Veterinary Sciences, Faculty of  
23 Health Sciences, University of Bristol, Bristol BS8 2BN, UK.

24

25 \*Corresponding Author; e-mail [r.unwin@manchester.ac.uk](mailto:r.unwin@manchester.ac.uk).

26

JX iTRAQ

1 **Abstract**

2 Alzheimer's disease (AD) is a progressive neurodegenerative disorder that currently affects 36 million  
3 people worldwide with no effective treatment available. Development of AD follows a distinctive  
4 pattern in the brain and is poorly modelled in animals. Therefore, it is vital to widen both the spatial  
5 scope of the study of AD and prioritise the study of human brains. Here we show that functionally  
6 distinct human brain regions show varying and region-specific changes in protein expression. These  
7 changes provide novel insights into the progression of disease, novel AD-related pathways, the  
8 presence of a 'gradient' of protein expression change from less to more affected regions, and the  
9 presence of a 'protective' protein expression profile in the cerebellum. This spatial proteomics  
10 analysis provides a framework which can underpin current research and opens new avenues of interest  
11 to enhance our understanding of molecular pathophysiology of AD, provides new targets for  
12 intervention and broadens the conceptual frameworks for future AD research.

13

14

15

## JX iTRAQ

1 Alzheimer's disease (AD) is a multifactorial neurodegenerative disorder characterized by progressive  
2 dementia<sup>1,2</sup>. Accumulation of A $\beta$  peptide and microtubule-associated protein tau, which exhibits  
3 hyperphosphorylation, and oxidative modifications into so-called 'plaques' and 'tangles' are  
4 considered to be central to the pathology of AD<sup>3</sup>. Other prominent features of AD include early  
5 region-specific decline in glucose utilisation and mitochondrial dysfunction and consequently  
6 depleted ATP production and increased reactive oxygen species production in neurons<sup>4</sup>.  
7 Excitotoxicity in the AD brain arising from altered glutamatergic signalling<sup>5</sup>, and dysregulation in  
8 other neurotransmitters has also been documented, including abnormalities of adrenergic, serotonergic  
9 and dopaminergic neurotransmission<sup>6</sup>. In response to pathological stimuli associated with AD,  
10 inflammatory events mediated through both innate and cell-mediated immune mechanisms are also  
11 present<sup>3</sup>.

12 Despite an increase in research into the underlying pathology of AD over the last decade, there  
13 remains controversy around what underpins this disease process, which in turn affects the pipeline of  
14 new disease modifying agents. There remains a lack of detailed mechanistic knowledge about what  
15 happens in the human brain in AD. This is exacerbated by the fact that different brain regions develop  
16 pathology at different times in the disease process, adding a spatial element to the disease which is not  
17 captured by work in cell culture models and is often overlooked in human studies, which tend to focus  
18 on single regions. Animal models also fail to capture the full disease process, at either the behavioral  
19 or biochemical levels<sup>7</sup>, such that translation of both basic biological findings and/or the activity of  
20 potential disease-modifying interventions from animals into humans is relatively unsuccessful. While  
21 there have been several studies which have focused on the transcriptome in human AD, there is a  
22 wealth of evidence that suggests many protein expression changes in biological systems can occur  
23 independently of transcript-level regulation, and that studying the proteome can prove new insights on  
24 the regulation of functionally active molecules in a given biological or disease state<sup>8</sup>.

25 Mass spectrometry based proteomics has been recognised as a powerful tool with the potential to  
26 uncover detailed changes in protein expression<sup>9</sup>. To date, however, there are few studies of protein  
27 expression in AD carried out using human brain tissue, and those that exist typically examine a single  
28 AD affected brain region<sup>10,11</sup>, and use different patient cohorts and analytical methods that makes  
29 between-region comparisons difficult. Such studies also frequently use either small numbers of  
30 samples (n<4) or cohorts poorly matched for age or tissue *post-mortem* delay<sup>10,12,13</sup>. This study aims to  
31 overcome some of these existing limitations by providing a spatially-resolved analysis of protein  
32 expression in six regions of human control and AD-affected brain in well matched, short *post-mortem*  
33 delay tissue.

## JX iTRAQ

### 1 Results

2 In this study, we analysed six functionally distinct regions of human *post-mortem* brain; hippocampus  
 3 (HP), entorhinal cortex (ENT), cingulate gyrus (CG), sensory cortex (SCx), motor cortex (MCx), and  
 4 cerebellum (CB), by mass spectrometry to gain a more comprehensive understanding of protein  
 5 expression changes within the AD brain. These regions were selected to represent parts of the brain  
 6 known to be heavily affected (HP, ENT, CG), lightly affected (SCx, MCx) and relatively ‘spared’  
 7 (CB) during the disease process. Donors were well matched for age and *post-mortem* delay times  
 8 were short, with no significant difference between cases and control. Donor data is provided in  
 9 Supplementary Table 1. Relative protein expression was determined using an isobaric tagging  
 10 approach followed by 2-dimensional liquid chromatography and mass spectrometry. Peptide-level  
 11 data were then analysed using a Bayesian model that infers a posterior probability distribution for the  
 12 relative levels of each protein between ‘cases’ and ‘controls’ based on the underlying relative peptide  
 13 levels. To promote sharing and usage of these data, we have developed a searchable web interface that  
 14 hosts all of our results ([www.manchester.ac.uk/dementia-proteomes-project](http://www.manchester.ac.uk/dementia-proteomes-project); described in  
 15 Supplementary Information), which also includes Bayesian probability distributions for each protein  
 16 across all individual brains examined in this study. The complete workflow is illustrated in Figure 1.  
 17 The complete processed data for each region (at protein identification FDR <1%) can be found in  
 18 Supplementary Table 2. Raw mass spectral data can be accessed via PRIDE, with initial search  
 19 outputs prior to Bayesian modelling available via the Open Science Framework at DOI  
 20 10.17605/OSF.IO/6BXJQ (Supplementary methods).

21

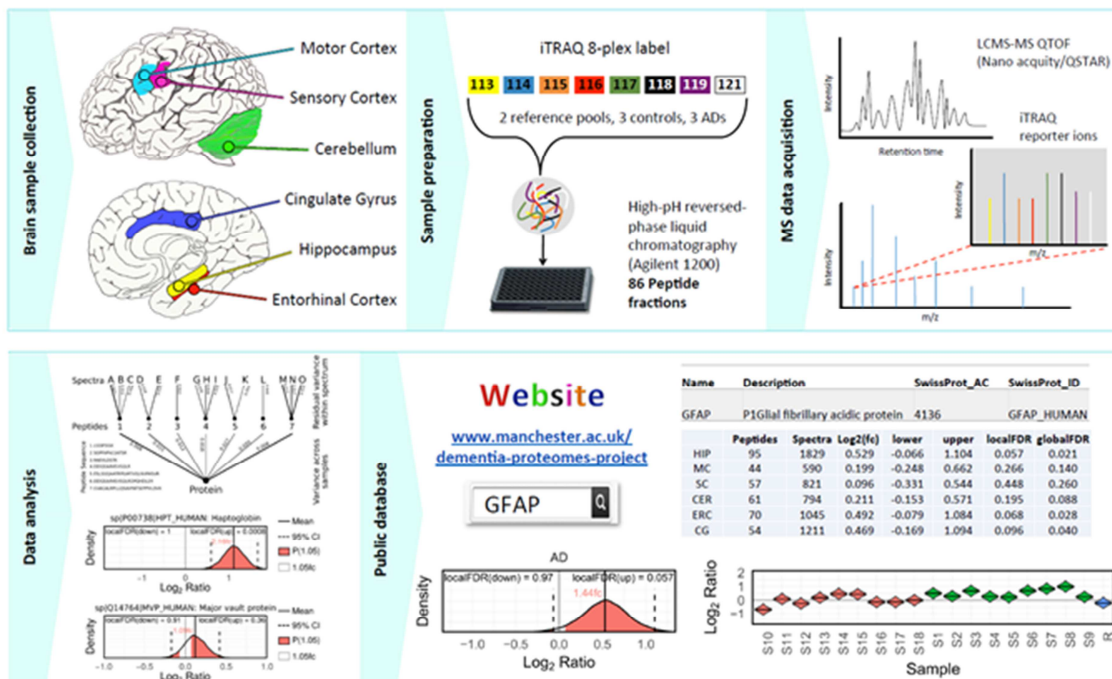

22



## JX iTRAQ

1 **Figure 1. Proteomics workflow.** Selected brain regions were pre-dissected prior to storage at -80°C until  
2 analysis. Each region was lysed, and protein assigned to an iTRAQ 8plex. Following digestion and labelling,  
3 samples were pooled, peptides fractionated by High-pH reverse phase chromatography and fractions analysed  
4 by standard LC-MS/MS methods. Peptides were identified and quantified based on their iTRAQ reporter area;  
5 relative protein quantification was inferred from these values using a Bayesian model. All data are deposited in  
6 a searchable online database.

7

8 Each brain region was analysed in isolation, adding strength to our comparison of protein expression  
9 changes across multiple regions, since these were identified and quantified independently. Combining  
10 all protein identifications (at 1% false discovery rate) across the six experiments yielded a total of  
11 5,825 unique protein identifications across all regions. In our data, 990 proteins were quantified with  
12 only one or two spectra in any single region, and were subsequently omitted from our downstream  
13 cross-regional comparison in order to retain the proteins with the most precise quantification –  
14 optimisation data suggests that when the same sample is split and processed independently, >99% of  
15 proteins are defined as not being significantly different above this threshold (data not shown).  
16 However, many of these will be quantified correctly (we have previously validated expression  
17 changes based on a single spectrum, e.g. p53 in<sup>8</sup>), and as such these data have been included in  
18 Supplementary Table 2 and our online database. We thus quantified a total of 4,835 distinct proteins  
19 in at least one brain region, among which 3,302 proteins were common to at least three regions, and  
20 1,899 to all six regions (Fig. 2a). These data allow us to a) define protein changes as a result of AD in  
21 any given region of the human brain being studied, and b) identify differences in how distinct brain  
22 regions are affected in AD, and by extension protein changes which occur in multiple regions of the  
23 AD brain.

24

JX iTRAQ

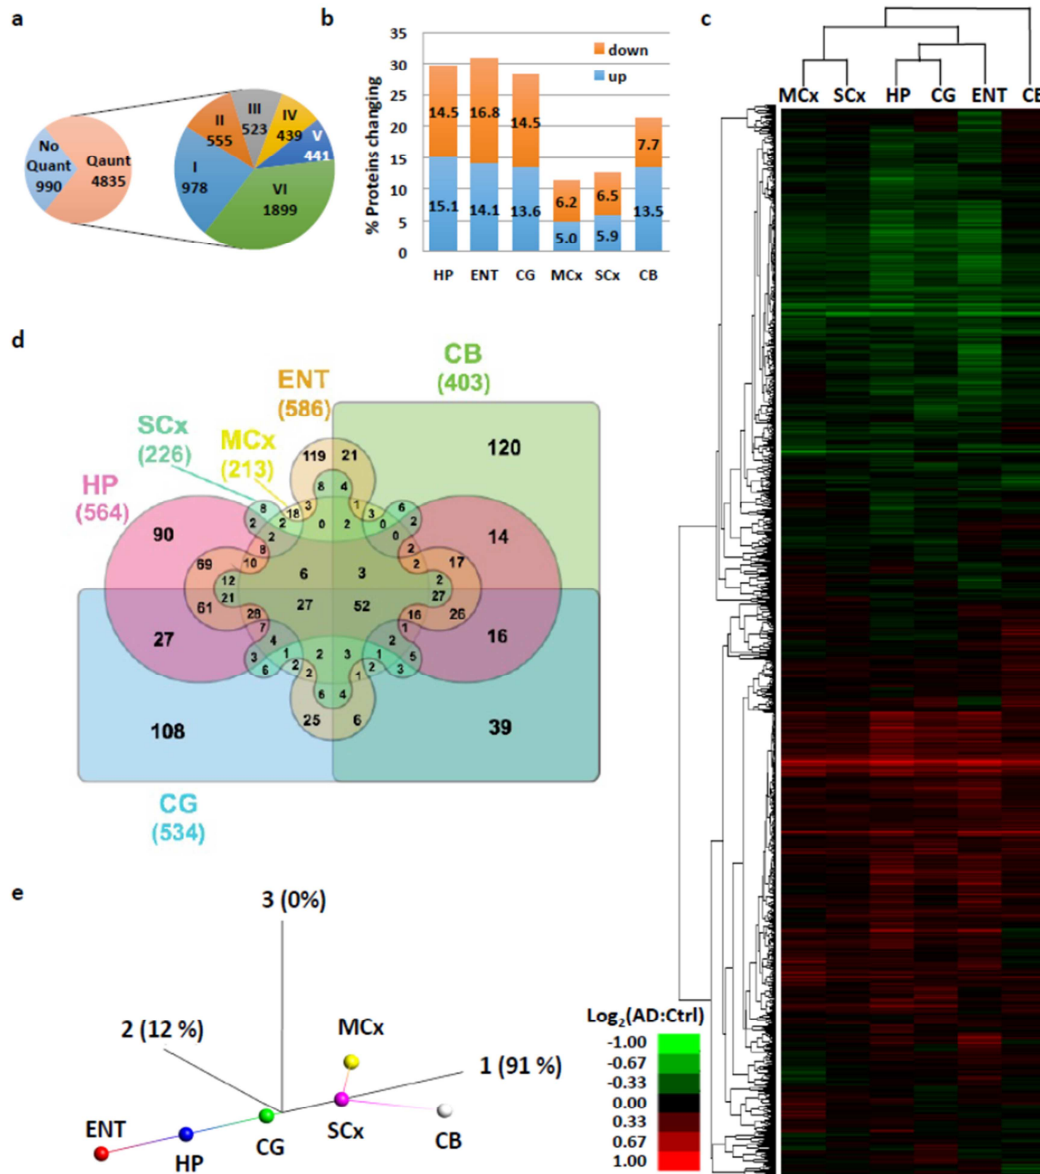

1

2 **Figure 2. Summary of protein expression data.** a) 5,825 proteins were identified, with 990 quantified with  
3 only one or two spectra and which were thus omitted from our primary comparative analysis. The remaining  
4 4,835 proteins are classified as to whether they were quantified in six or fewer distinct regions. b) Proportion of  
5 identified, quantified proteins showing a change in expression in AD in each of the six regions under study. c)  
6 Heat map and dendrogram showing the relationship between protein expression in each region mapped using  
7 proteins present in all six regions, with three distinct ‘groups’ based on highly affected (HP, ENT, CG),  
8 moderate (MCx, SCx) and spared (CB) clearly visible. d) Edwards-Venn diagram showing the overlap of  
9 protein expression changes between brain regions, including only proteins quantified in all regions. e) Isometric  
10 mapping (Isomap) representation of protein expression data between brain regions showing a broadly linear  
11 relationship from non-affected towards affected regions, with the exception of cerebellum, which shows distinct  
12 patterns of protein expression in AD.

## JX iTRAQ

1

2 Comparison of the total number of proteins whose expression is altered in each region reveals,  
3 perhaps unsurprisingly, that the more severely affected areas in AD (HP, ENT, CG) show the largest  
4 number of changes in protein expression (~30% of quantified proteins), while less affected regions  
5 (MCx, SCx) have fewer changes (11-13%). Strikingly, the CB, which many think to be pathologically  
6 'unaffected', shows a substantial number of protein changes (20%; Fig. 2b). This observation  
7 accurately recapitulates data from our previous study of the metabolome on these brain samples<sup>14</sup>.  
8 Unsupervised hierarchical clustering of protein expression changes from all six regions demonstrates  
9 that the changes observed in CB are distinct from those seen in the affected HP, CG and ENT (Fig.2c).  
10 This is supported by an Edwards-Venn representation of the data which shows that 120/403 (29.8%)  
11 of changes in CB are not seen elsewhere (Fig.2d; Supplementary Table 3). While it has long been  
12 reported that the CB in AD can contain amyloid plaques<sup>15</sup>, it is considered to be relatively 'spared' in  
13 AD. There is a lack of neurofibrillary tangles in cerebellum<sup>16</sup>, and this region does not appear to  
14 develop significant neuronal loss, such that this region is often used as a control in imaging studies of  
15 the AD brain<sup>17,18</sup>. However, recent work by Guo *et al.* suggests a distinct pattern of cerebellar atrophy,  
16 which spreads from intrinsic connectivity networks within the cerebrum<sup>19</sup>, and alterations in  
17 cerebellar glucose metabolism have been reported in late stages of the disease<sup>20,21</sup>. Our data strongly  
18 suggest that the CB is heavily affected by AD at the molecular level, at least in late stage disease, and  
19 is so to a greater extent than other regions associated with later degeneration such as MCx or SCx,  
20 where protein changes were fewer and encompass those seen in the more severely affected regions.  
21 That the changes in CB are different from those seen elsewhere in the brain raises the possibility that,  
22 rather than being 'spared', the CB is affected in a different way to other brain regions and that, given  
23 it shows little pathology, these changes may reflect some level of active protection.

24

25 Hereinafter, we refer to HP, ENT and CG as the severely affected, and MCx and SCx as the less  
26 affected regions based on the number of significantly altered proteins and pathways observed within  
27 this study.

28

29 Unsupervised clustering of brain regions based on their protein expression, by performing a  
30 dimensionality reduction on these data using isomeric feature mapping (Isomap), clearly shows this  
31 hypothesized 'evolution' of the disease from the least affected cortical regions to the most affected,  
32 with cerebellum following a distinct pathway from the inception of disease (Figure 2e). This non-  
33 linear approach has been shown to be an improvement over the more standard PCA approach for  
34 analysis of gene and signalling networks<sup>22</sup>. These data also further support our previous observation  
35 that CB stands out as a single, uniquely affected brain region based on the distinctive patterns of

## JX iTRAQ

1 changes found here while the other regions line up along the same vector in accordance with disease  
2 severity. Previous studies using gene co-expression networks and transcriptomics analysis have  
3 demonstrated a pattern where the molecular signatures in less-affected areas of the brain overlap with  
4 but are less marked than the grossly affected areas, and have implied that these overlapping changes  
5 represent those which occur early in AD-related neurodegeneration<sup>23</sup>. Our data at the protein level  
6 would support this conclusion - the less affected regions (MCx and SCx) contain very few protein  
7 changes which are not seen elsewhere, and a clustering analysis suggests that these regions are simply  
8 at an earlier stage down a similar pathway. Therefore, our data shows that by comparing more and  
9 less affected brain regions in a multi-regional approach we can observe different stages of the same  
10 disease process, enabling identification of early molecular changes, even in patients with late-stage  
11 disease.

12

13 To probe the differences in AD-related protein expression between brain regions in more mechanistic  
14 detail, we performed a pathway enrichment analysis for all differentially expressed proteins for each  
15 region. Such analyses enable us to visualise which processes are affected in the AD brain, and also  
16 whether two (or more) regions are showing dysregulation in the same pathway even if different  
17 subsets of proteins are identified as ‘changing’. These data are summarised in Figs 3a-f (and  
18 Supplementary Table 4).

19

20 Reflecting the individual protein expression data, HP and CG showed the highest number of  
21 biological pathways being affected by AD. The changes in specific molecular pathways were  
22 comparable between HP, ENT, and CG. CB, on the other hand, showed altered regulation of a set of  
23 molecular pathways with limited overlap with those affected in the other five brain regions, again  
24 arguing for the presence of a distinct cellular response to disease in this region.

25

26 One of the most consistent features across all brain regions was a significant change in proteins and  
27 pathways involved with the innate immune response. In AD, aggregates of A $\beta$  can trigger both  
28 pathogen-associated and initiate immune responses, and a persisting elevation of A $\beta$  may elicit a  
29 chronic reaction of the innate immune system<sup>24</sup>. In this study, we observed strong evidence for the  
30 global activation of the innate immune response, including of the acute-phase response, the  
31 complement system (classical and alternative pathways) and the coagulation system, consistent with  
32 widespread neuroinflammation, suggesting that this may be a relatively early (prior to atrophy) event  
33 in pathogenesis. Previous studies have also implicated complement family proteins as potential AD  
34 biomarkers<sup>25</sup>, and GWAS studies have identified AD risk loci in a number of complement pathway  
35 genes<sup>26-28</sup>. It is worthy of note that these studies do not directly inform on the activation state of the

## JX iTRAQ

1 complement pathway, and indeed in our study we see upregulation of SerpinG1, which inhibits  
2 complement C4 cleavage by C1 and MASP2, as well as increased levels of C4, C3 and various  
3 regulators in AD. While it is highly likely that dysregulation of this pathway plays a role in AD, the  
4 precise nature of this role remains to be determined. Overall, HP, ENT and CG showed substantive  
5 evidence for a broader spectrum of changes in immune responses compared to MCx, SCx and CB.  
6 These included specific cellular pathways including granulocyte adhesion and dendritic cell  
7 maturation (Fig. 3a–f, Supplementary Data Table 4 and 5), implying that the innate immune system  
8 becomes activated early, and that the adaptive immune response plays a role later in the disease  
9 process. However the interplay between these two systems is complex and it is yet to be determined if  
10 these changes are a cause, or a consequence of other aspects of AD pathogenesis<sup>29</sup>.

11

12 This pathway-level analysis also identified signaling pathways involved in apoptosis and cell cycle  
13 regulation as being widely dysregulated in severely affected regions of AD brain, including the  
14 HIPPO, ERK/MAPK, PI3K/AKT, and Wnt/ $\beta$ -catenin pathways (Fig.3a, b, d), all known to be  
15 critically involved in regulation of apoptosis and the cell cycle. Reduced abundance of proteins  
16 involved in Polo-Like Kinase signaling and G2/M DNA Damage Checkpoint Regulation are likely a  
17 cause of impaired cell cycle regulation, marking these pathways out as potentially key contributors to  
18 neuronal cell death in AD. Strikingly, less affected regions SCx and MCx do not show large changes  
19 in these pathways (Fig.3e, f), reflecting reduced levels of apoptosis seen in these areas. The only  
20 exceptions are the G2/M checkpoint and the Hippo pathway, whose members are significantly  
21 decreased in these regions, suggesting that inactivation of this key developmental pathway, possibly  
22 via the observed upregulation of CD44<sup>30</sup>, or altered regulation of associated proteins such as the  
23 synaptic scaffolding proteins DLG2, DLG3, and DLG4, all of which are downregulated, is an early  
24 event in AD development. In CB, only granzyme A signaling was identified as an apoptosis-related  
25 pathway, indicative of fewer cell death signals in this region.

26

JX iTRAQ

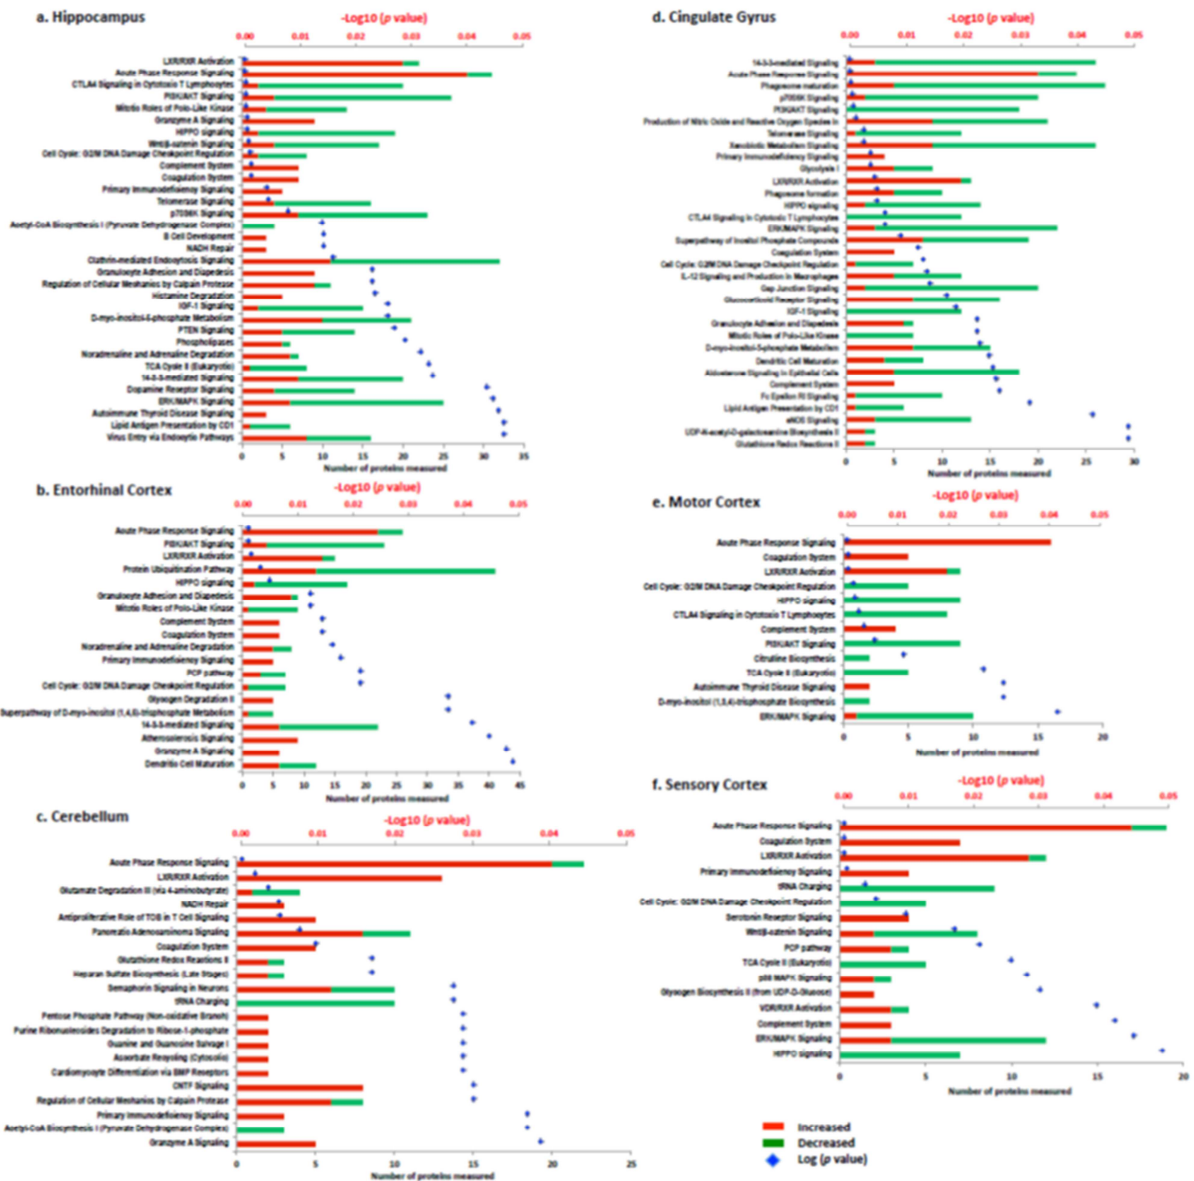

1  
 2 **Figure 3. Network analysis summary.** Alterations of molecular pathways in human Alzheimer's  
 3 disease brain across six distinct regions, namely a) Hippocampus, b) Entorhinal cortex, c) Cerebellum,  
 4 d) Cingulate gyrus, e) Motor cortex, and f) Sensory cortex. In each plot, the numbers of increased and  
 5 decreased proteins are indicated by the red/green bars, while the blue spots indicate the  $\log_{10}(p\text{-value})$   
 6 for each pathway.

7  
 8  
 9  
 10



## JX iTRAQ

1 We also observed both global and regional metabolic impairments in the AD brain. Defects in brain  
2 metabolism and energetics are central to the pathogenesis of AD as evidence by epidemiological,  
3 neuropathological, and functional neuroimaging studies<sup>31</sup>. The AD brain characteristically exhibits  
4 defective cerebral perfusion<sup>32</sup> and glucose uptake<sup>33</sup>, which is believed to underlie hypometabolism and  
5 cognitive decline<sup>34</sup>. Alterations in pathways of monosaccharide/glucose metabolism are highly  
6 significant in severely affected brain regions and CB (Fig.3a – f, Supplementary Data Table 4),  
7 consistent with our previous finding of elevated free glucose levels in AD brain<sup>21</sup>. TCA enzyme  
8 abundance was generally decreased in all regions of AD brain, going some way to explaining the  
9 previously observed shift from primarily aerobic glycolysis (i.e. glycolysis followed by complete  
10 oxidation in mitochondria) to the ketogenic/fatty acid  $\beta$ -oxidation pathway, with impaired  
11 mitochondrial bioenergetics<sup>35</sup>. Severely affected brain regions also showed substantial alterations in  
12 signals related to altered regulation of neurotransmitters/hormones (noradrenaline/adrenaline,  
13 dopamine, and aldosterone) that were not observed in less affected regions. While this might suggest  
14 that altered neurotransmitter biology is a late or downstream process in pathogenesis, it is notable that  
15 the enzymes in a key upstream pathway of neurotransmitter production which results in the  
16 production of tetrahydrobiopterin (BH4), a precursor of dopamine, noradrenaline and serotonin, is  
17 significantly upregulated in all regions studied. Previous work has suggested a decrease in BH4 levels  
18 in AD brain<sup>36</sup> and the observations at the protein level may reflect a feedback loop where the cell is  
19 responding to decreased BH4. The presence of this dysregulation early in disease suggests it is a  
20 target which deserves closer attention.

21

22 While comparison of affected regions yields a range of interesting and novel observations about the  
23 molecular underpinning of AD, the presence of a large number of changes in ‘unaffected’ cerebellum  
24 provides a surprising finding, even more so when one observes that these changes are distinct from  
25 those manifest elsewhere. To investigate this population of protein changes further, we analysed  
26 proteins uniquely affected in CB using both DAVID and STRING. These analyses supported our  
27 earlier global pathway analysis in demonstrating that CB additionally showed alteration in  
28 Semaphorin and ciliary neurotrophic factor (CNTF) pathway members which play important roles in  
29 neuronal survival and neurodevelopment/neuronal regeneration (Fig.3c and Fig.4a, b). SEMA7A,  
30 shown here to be upregulated in CB of AD brains, is known to be involved in repair of the glial scar  
31 following spinal cord injury and to play a role in the development of multiple sclerosis, but has not  
32 previously been linked to the disease process in AD<sup>37</sup>. CB also showed a significant reduction in  
33 levels of both nuclear and mitochondrial aminoacyl-tRNA synthetases. In CB, significantly depleted  
34 aminoacyl tRNA synthetases, including those encoded in the mitochondrial genome as well as those  
35 from the nuclear genome (Fig.3c and Supplementary Data Table 3), could disrupt translational  
36 fidelity, leading to accumulation of misfolded proteins<sup>38</sup>. However, these proteins are multifunctional.



## JX iTRAQ

1 For example, Ishimura *et al.* have shown that misregulated tRNA processing can lead to  
 2 neurodegeneration<sup>39</sup>, and tRNA synthetases have also been shown to be mediators of inflammation  
 3 <sup>40</sup>thus downregulating these proteins may confer some level of protection. This finding could also  
 4 provide a supportive mechanism for the hypothesis that ribosomal dysfunction is an early event in  
 5 AD<sup>41</sup>. Taken together with its known roles in inflammation and signaling, and in several other  
 6 neurodegenerative disorders<sup>42</sup>, our data suggest that the role of tRNA synthetases in Alzheimer's  
 7 disease is worthy of significant further investigation.

8

9 One of the most distinct changes observed in this CB-specific analysis was that a much greater  
 10 number of proteins of electron transport chain (ETC) complex 1 were consistently more reduced in  
 11 abundance (Fig.4b, c Supplementary Data Table 5) than was found in other areas. Furthermore, CB  
 12 showed increases in oxidative defense proteins involved in glutathione redox reactions and ascorbate  
 13 recycling (Fig.3c). These data provide strong additional evidence for a protective mechanism in CB  
 14 that decreases ROS-production by ETC while simultaneously increasing ROS defenses. Another  
 15 interesting observation in CB was the activation of a Purine Ribonucleosides Degradation pathway,  
 16 which could not only contribute substrate to the pentose phosphate pathway, but also participate in  
 17 guanine/guanosine production in this brain region. Combined with the observed activation of Guanine  
 18 and Guanosine Salvage I pathway, and an increase in guanosine level in CB as previously reported by  
 19 our metabolomics analysis<sup>14</sup>, these changes may also confer a previously unknown neuroprotective  
 20 effect in this brain region<sup>43</sup>.

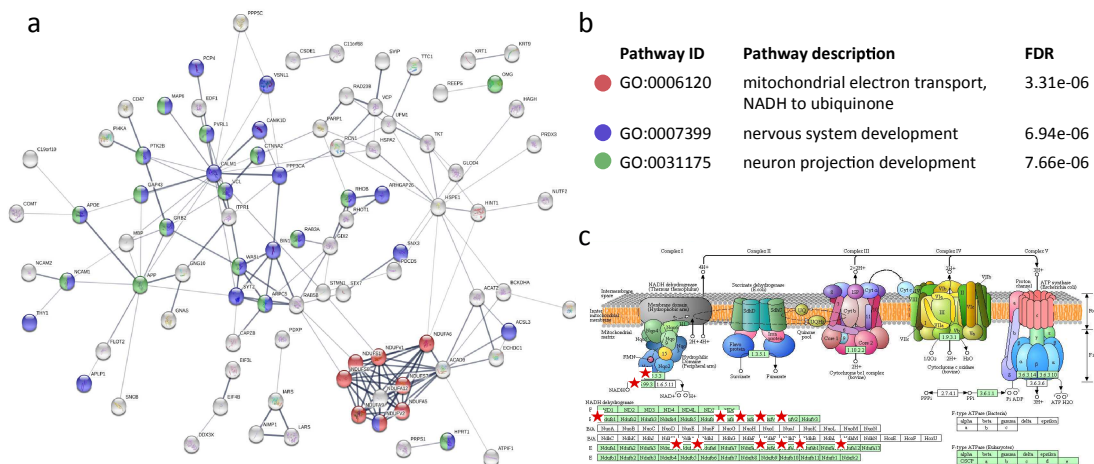

21

22 **Figure 4. CB-specific biological processes in AD brain.** a) 120 proteins that showed CB-specific  
 23 alterations were enriched for molecular processes in STRING using default setting. Each node  
 24 represents a protein, and proteins involved in b) significantly enriched pathways were highlighted. c)  
 25 Dysregulation of the mitochondrial electron transport chain was highlighted by pathway analysis, and

## JX iTRAQ

1 proteins affected mapped (red star) into the NADH dehydrogenase complex in KEGG oxidative  
2 phosphorylation map.

3

4 It is well established that CB does not display extensive apoptotic activation seen elsewhere in the  
5 brain in Alzheimer's disease, which is unsurprising given its structurally unaffected status. Our  
6 findings indicate that the lack of significant neurodegeneration in this region is not merely due to the  
7 absence of an apoptotic signal (e.g. Tau tangles) but instead that CB actively induces a unique pattern  
8 of upregulated neuronal survival pathways alongside protection against oxidative and inflammatory  
9 damage; a protective mechanism of gene/protein expression which limits disease-related degeneration  
10 in this region.

11

12 Given the apparently similarity in protein expression which we seen wining each group (severely  
13 affected and less affected), we next attempt to identify key regulators of what appears to be a  
14 coordinated alteration in protein expression across the brain in response to AD. We performed a  
15 correlation network analysis to identify key nodes which may be responsible for the programme of  
16 protein expression observed, using the Cytoscape ModuLand plug-in<sup>44</sup>. The resulting correlation  
17 network is shown in Figure 5a. Each cluster is coloured differently according to a distinct meta-node,  
18 the key regulators of which can be determined by visualizing higher levels of this hierarchy (Fig. 5b).  
19 Using this method, we can identify the most influential genes in this correlation network which we  
20 hypothesize to be key regulators of protein expression during the pathogenesis of AD. It is noteworthy  
21 that in this correlation matrix we are aiming to correlate what we believe to be two distinct processes  
22 – AD pathogenesis (seen in HP, ENT, CG, MCx and SCx) and a protective programme that we  
23 observe in CB. By overlaying protein expression data onto this network, we can identify which nodes  
24 are associated with which process. This overlay (Fig. 5c-h) clearly demonstrates that the correlation  
25 network is mainly constructed from proteins involved in AD pathogenesis in the affected regions –  
26 few proteins in the network are changed in CB despite the relatively large number of CB proteins  
27 which we observe to be changed in the complete dataset. This is to be expected as CB-specific protein  
28 changes have limited correlation to the remainder of the dataset. This network is therefore likely to  
29 provide a good representation of the key events in AD pathogenesis, and reveals four proteins with the  
30 most overall influence on the correlated expression networks: STXBP1 (syntaxin binding protein 1);  
31 CRMP1, (collapsin response-mediator protein 1); ACTR10, (actin-related protein 10 homologue); and  
32 AMPH (amphiphysin).

33

34 STXBP1 is the regulator with the most influence in this network. It is reportedly upregulated in AD<sup>45</sup>,  
35 has been linked to NFTs<sup>46</sup> and may interact with PS1<sup>47</sup>. It also plays a major role in neurotransmitter

JX iTRAQ

1 release. STXBP1 thus provides a potential mechanistic explanation for our observation that pathways  
 2 of neurotransmitter metabolism including dopamine-, noradrenaline-, and serotonin-related signalling  
 3 showed significant changes in severely affected regions and SCx, but not in MCx or CB. Another  
 4 important regulator of the network, CRMP1, is part of the semaphorin signalling pathway which is  
 5 known to guide axons in developing nervous tissue and participates in shaping of neural circuits<sup>48</sup>.  
 6 ACTR10 may affect prion susceptibility through its involvement in prion propagation and clearance<sup>49</sup>,  
 7 and has been identified by large scale computational network analyses as one of a large number of  
 8 potentially important genes in hippocampal ageing, but our finding is novel in AD<sup>50</sup>. The 4<sup>th</sup> key  
 9 network regulator identified here, AMPH, is a candidate AD risk gene that may participate in  
 10 receptor-mediated endocytosis and hence be involved in APP metabolism/clearance<sup>51</sup>. Our finding  
 11 that these four genes appear to be central to various pathological processes known to be involved in  
 12 AD development is important, and suggests that further work should be performed to focus on the role  
 13 of these potentially key mediators of Alzheimer's disease progression.

14

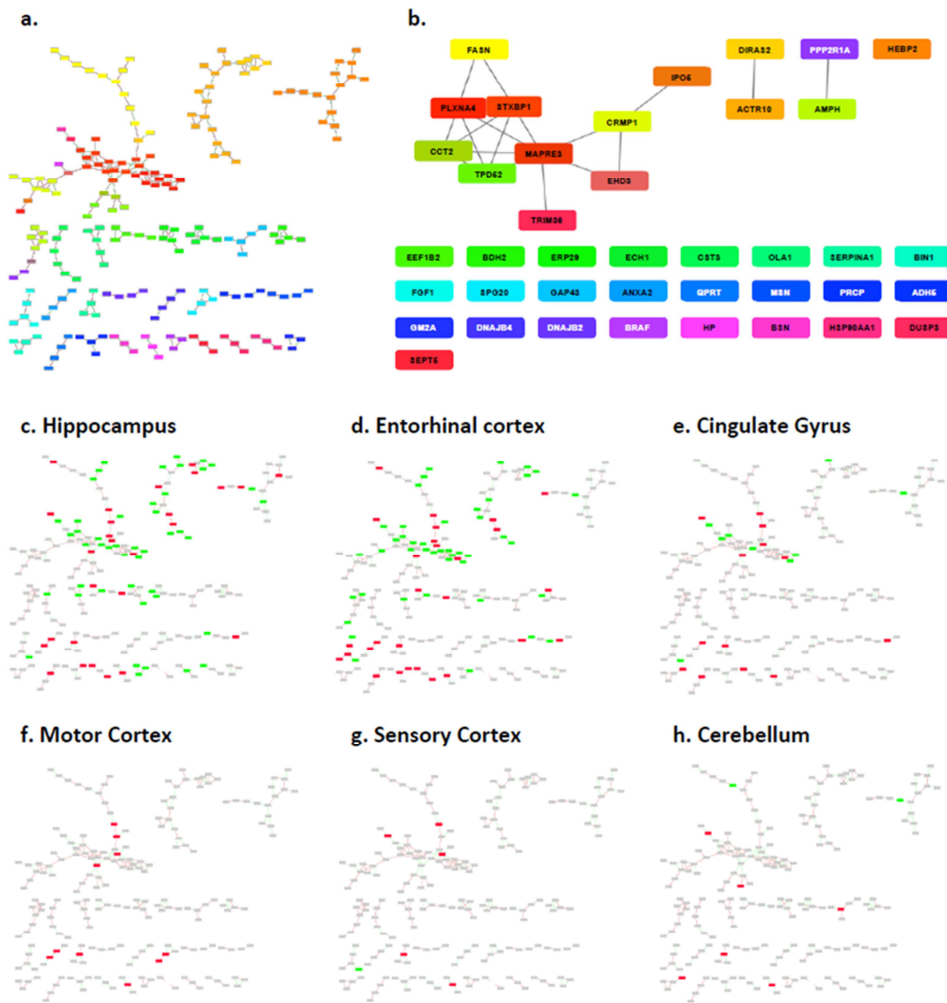

15

## JX iTRAQ

1 **Figure 5. Global networks analysis** was performed using Cytoscape ModuLand plug-in. a)  
2 Correlation network of altered proteins in AD brain, with differently coloured clusters representing  
3 different meta-nodes b) key regulators of each meta-node c-h) Overlays of protein expression data  
4 from each region and the correlation network.

5

6 Since one of the key factors in AD pathogenesis is thought to be the build-up of amyloid consisting of  
7 A $\beta$  peptide generated as a proteolytic product of the Amyloid precursor protein (APP) we examined  
8 our data for information about the levels and distribution of these molecules. We found no marked  
9 change in APP levels overall but significantly elevated A $\beta$  peptide levels (Supplementary Figure 2a-  
10 b), consistent with previous reports<sup>52</sup>. The extent of the increase in A $\beta$  between regions does not  
11 appear to follow a gradient of ‘affectedness’, albeit there may be a more pronounced increase in  
12 hippocampus. There is no way to determine the primary structure of the A $\beta$  peptide(s) present in each  
13 region from these data. Interestingly, while in the AD group almost all samples showed uniformly  
14 high levels of A $\beta$  peptide, there was marked variation in levels in control samples (Supplementary  
15 Figure 2c). While the quantification of A $\beta$  is necessarily from one peptide, these data emanate from  
16 between 5 and 12 unique spectra in each sample we consider this observation is likely robust. This  
17 variability is therefore likely to be due to inherent variations in the control population. Although all  
18 patients in this group were asymptomatic, it is likely that varying degrees of prodromal disease could  
19 have been present, given their age. This is most noticeable in our control 115. While initially  
20 assigned as a control, a pathological re-examination performed as a result of the findings of this study  
21 and our previous metabolomics analyses<sup>14</sup> re-classified this individual as a Braak II pre-clinical AD  
22 patient. This patient has the highest level of A $\beta$  of all of the control samples and interestingly appears  
23 to demonstrate some AD-related changes both in their metabolome and in some of the proteins which  
24 we observe to be changed in symptomatic disease. This observation supports the idea that increases in  
25 A $\beta$  levels may reflect varying degrees of prodromal disease in these elderly controls. It also  
26 demonstrates that studies of the type performed here in earlier stage presymptomatic patients will be  
27 critical to further tease out the very earliest events in AD pathogenesis.

28

29 In summary, this study provides a map of molecular changes that are present in human *post-mortem*  
30 brain tissue in patients with AD and matched controls, providing insights into the brain region  
31 specificity of disease at two levels; individual proteins and pathways. We observed global  
32 perturbation of protein expression in all six regions of the AD brain which we studied. An association  
33 between extent of molecular changes and affectedness was observed for five regions, allowing us to  
34 delineate probably ‘early’ and ‘late’ changes in protein expression and revealing previously novel  
35 involvement of several pathways and processes. The sixth region, CB, showed an unexpectedly

## JX iTRAQ

1 distinct pattern of protein changes, suggestive of induction of a protective response. Correlation  
2 network analysis identified four candidate genes STXBP1, CRMP1, ACTR10, and AMPH which may  
3 underpin significant portions of the protein expression response to AD. Finally, we recognize that  
4 these data have significant value to the community and that other researchers will no doubt wish to  
5 assess the status of other AD-related changes not discussed here. As such we have provided all results  
6 in an accessible format via a freely-available, searchable on-line database, to allow others to probe  
7 specific pathways or individual proteins and their expression in regions across the human Alzheimer's  
8 disease brain and matched controls.

9

10

## 11 References

- 12 1 Braak, H. & Braak, E. Evolution of neuronal changes in the course of Alzheimer's disease.  
13 *Journal of neural transmission. Supplementum* **53**, 127-140 (1998).
- 14 2 Dickson, D. W. Neuropathological diagnosis of Alzheimer's disease: a perspective from  
15 longitudinal clinicopathological studies. *Neurobiol Aging* **18**, S21-26 (1997).
- 16 3 Mattson, M. P. Pathways towards and away from Alzheimer's disease. *Nature* **430**, 631-639,  
17 doi:10.1038/nature02621 (2004).
- 18 4 Ferreira, I. L., Resende, R., Ferreira, E., Rego, A. C. & Pereira, C. F. Multiple defects in  
19 energy metabolism in Alzheimer's disease. *Current drug targets* **11**, 1193-1206 (2010).
- 20 5 Rudy, C. C., Hunsberger, H. C., Weitzner, D. S. & Reed, M. N. The role of the tripartite  
21 glutamatergic synapse in the pathophysiology of Alzheimer's disease. *Aging and disease* **6**,  
22 131-148, doi:10.14336/ad.2014.0423 (2015).
- 23 6 Chen, K. H., Reese, E. A., Kim, H. W., Rapoport, S. I. & Rao, J. S. Disturbed  
24 neurotransmitter transporter expression in Alzheimer's disease brain. *Journal of Alzheimer's*  
25 *disease : JAD* **26**, 755-766, doi:10.3233/jad-2011-110002 (2011).
- 26 7 Webster, S. J., Bachstetter, A. D., Nelson, P. T., Schmitt, F. A. & Van Eldik, L. J. Using mice  
27 to model Alzheimer's dementia: an overview of the clinical disease and the preclinical  
28 behavioral changes in 10 mouse models. *Frontiers in Genetics* **5**, 88,  
29 doi:10.3389/fgene.2014.00088 (2014).
- 30 8 Lu, R. *et al.* Systems-level dynamic analyses of fate change in murine embryonic stem cells.  
31 *Nature* **462**, 358-362, doi:10.1038/nature08575 [doi] (2009).
- 32 9 Hawkrige, A. M. & Muddiman, D. C. Mass spectrometry-based biomarker discovery:  
33 toward a global proteome index of individuality. *Annual review of analytical chemistry (Palo*  
34 *Alto, Calif.)* **2**, 265-277, doi:10.1146/annurev.anchem.1.031207.112942 (2009).
- 35 10 Andreev, V. P. *et al.* Label-free quantitative LC-MS proteomics of Alzheimer's disease and  
36 normally aged human brains. *J Proteome Res* **11**, 3053-3067, doi:10.1021/pr3001546 (2012).
- 37 11 Hondius, D. C. *et al.* Profiling the human hippocampal proteome at all pathologic stages  
38 of Alzheimer's disease. *Alzheimer's & Dementia* **12**, 654-668,  
39 doi:<http://dx.doi.org/10.1016/j.jalz.2015.11.002> (2016).
- 40 12 Musunuri, S. *et al.* Quantification of the brain proteome in Alzheimer's disease using  
41 multiplexed mass spectrometry. *J Proteome Res* **13**, 2056-2068, doi:10.1021/pr401202d  
42 (2014).
- 43 13 Manavalan, A. *et al.* Brain site-specific proteome changes in aging-related dementia.  
44 *Experimental & molecular medicine* **45**, e39, doi:10.1038/emm.2013.76 (2013).



JX iTRAQ

- 1 14 Xu, J. *et al.* Graded perturbations of metabolism in multiple regions of human brain in  
2 Alzheimer's disease: Snapshot of a pervasive metabolic disorder. *Biochimica et biophysica*  
3 *acta* **1862**, 1084-1092, doi:10.1016/j.bbadis.2016.03.001 (2016).
- 4 15 Braak, H., Braak, E., Bohl, J. & Lang, W. Alzheimer's disease: amyloid plaques in the  
5 cerebellum. *J Neurol Sci* **93**, 277-287 (1989).
- 6 16 Wegiel, J. *et al.* Cerebellar atrophy in Alzheimer's disease-clinicopathological correlations.  
7 *Brain Res* **818**, 41-50 (1999).
- 8 17 Dukart, J. *et al.* Differential effects of global and cerebellar normalization on detection and  
9 differentiation of dementia in FDG-PET studies. *NeuroImage* **49**, 1490-1495,  
10 doi:10.1016/j.neuroimage.2009.09.017 (2010).
- 11 18 Lyoo, C. H. *et al.* Cerebellum Can Serve As a Pseudo-Reference Region in Alzheimer  
12 Disease to Detect Neuroinflammation Measured with PET Radioligand Binding to  
13 Translocator Protein. *Journal of Nuclear Medicine* **56**, 701-706,  
14 doi:10.2967/jnumed.114.146027 (2015).
- 15 19 Guo, C. C. *et al.* Network-selective vulnerability of the human cerebellum to Alzheimer's  
16 disease and frontotemporal dementia. *Brain* **139**, 1527-1538, doi:10.1093/brain/aww003  
17 (2016).
- 18 20 Ishii, K. *et al.* Reduction of cerebellar glucose metabolism in advanced Alzheimer's disease.  
19 *Journal of nuclear medicine : official publication, Society of Nuclear Medicine* **38**, 925-928  
20 (1997).
- 21 21 Xu, J. *et al.* Elevation of brain glucose and polyol-pathway intermediates with accompanying  
22 brain-copper deficiency in patients with Alzheimer's disease: metabolic basis for dementia.  
23 *Scientific reports* **6**, 27524, doi:10.1038/srep27524 (2016).
- 24 22 Ivakhno, S. & Armstrong, J. D. Non-linear dimensionality reduction of signaling networks.  
25 *BMC systems biology* **1**, 27, doi:10.1186/1752-0509-1-27 (2007).
- 26 23 Ray, M. & Zhang, W. Analysis of Alzheimer's disease severity across brain regions by  
27 topological analysis of gene co-expression networks. *BMC systems biology* **4**, 136,  
28 doi:10.1186/1752-0509-4-136 (2010).
- 29 24 Heneka, M. T., Golenbock, D. T. & Latz, E. Innate immunity in Alzheimer's disease. *Nature*  
30 *immunology* **16**, 229-236, doi:10.1038/ni.3102 (2015).
- 31 25 Lovestone, S. *et al.* AddNeuroMed--the European collaboration for the discovery of novel  
32 biomarkers for Alzheimer's disease. *Ann N Y Acad Sci* **1180**, 36-46, doi:10.1111/j.1749-  
33 6632.2009.05064.x (2009).
- 34 26 Harold, D. *et al.* Genome-wide association study identifies variants at CLU and PICALM  
35 associated with Alzheimer's disease. *Nature genetics* **41**, 1088-1093, doi:10.1038/ng.440  
36 (2009).
- 37 27 Lambert, J. C. *et al.* Genome-wide association study identifies variants at CLU and CR1  
38 associated with Alzheimer's disease. *Nature genetics* **41**, 1094-1099, doi:10.1038/ng.439  
39 (2009).
- 40 28 Zhang, D. F. *et al.* CFH Variants Affect Structural and Functional Brain Changes and Genetic  
41 Risk of Alzheimer's Disease. *Neuropsychopharmacology : official publication of the*  
42 *American College of Neuropsychopharmacology* **41**, 1034-1045, doi:10.1038/npp.2015.232  
43 (2016).
- 44 29 Van Eldik, L. J. *et al.* The roles of inflammation and immune mechanisms  
45 in Alzheimer's disease. *Alzheimer's & Dementia: Translational Research & Clinical*  
46 *Interventions* **2**, 99-109, doi:<https://doi.org/10.1016/j.trci.2016.05.001> (2016).
- 47 30 Xu, Y., Stamenkovic, I. & Yu, Q. CD44 attenuates activation of the Hippo signaling pathway  
48 and is a prime therapeutic target for glioblastoma. *Cancer research* **70**, 2455-2464,  
49 doi:10.1158/0008-5472.CAN-09-2505 (2010).
- 50 31 Kapogiannis, D. & Mattson, M. P. Disrupted energy metabolism and neuronal circuit  
51 dysfunction in cognitive impairment and Alzheimer's disease. *The Lancet. Neurology* **10**, 187-  
52 198, doi:10.1016/s1474-4422(10)70277-5 (2011).
- 53 32 Bradley, K. M. *et al.* Cerebral perfusion SPET correlated with Braak pathological stage in  
54 Alzheimer's disease. *Brain* **125**, 1772-1781 (2002).

JX iTRAQ

- 1 33 Arnaiz, E. *et al.* Impaired cerebral glucose metabolism and cognitive functioning predict  
2 deterioration in mild cognitive impairment. *Neuroreport* **12**, 851-855 (2001).
- 3 34 Costantini, L. C., Barr, L. J., Vogel, J. L. & Henderson, S. T. Hypometabolism as a  
4 therapeutic target in Alzheimer's disease. *BMC neuroscience* **9 Suppl 2**, S16,  
5 doi:10.1186/1471-2202-9-s2-s16 (2008).
- 6 35 Yao, J., Rettberg, J. R., Klosinski, L. P., Cadenas, E. & Brinton, R. D. Shift in brain  
7 metabolism in late onset Alzheimer's disease: implications for biomarkers and therapeutic  
8 interventions. *Molecular aspects of medicine* **32**, 247-257, doi:10.1016/j.mam.2011.10.005  
9 (2011).
- 10 36 Foxton, R. H., Land, J. M. & Heales, S. J. Tetrahydrobiopterin availability in Parkinson's and  
11 Alzheimer's disease; potential pathogenic mechanisms. *Neurochemical research* **32**, 751-756,  
12 doi:10.1007/s11064-006-9201-0 (2007).
- 13 37 Eixarch, H., Gutiérrez-Franco, A., Montalban, X. & Espejo, C. Semaphorins 3A and 7A:  
14 potential immune and neuroregenerative targets in multiple sclerosis. *Trends in Molecular*  
15 *Medicine* **19**, 157-164, doi:10.1016/j.molmed.2013.01.003.
- 16 38 Lee, J. W. *et al.* Editing-defective tRNA synthetase causes protein misfolding and  
17 neurodegeneration. *Nature* **443**, 50-55, doi:10.1038/nature05096 (2006).
- 18 39 Ishimura, R. *et al.* Ribosome stalling induced by mutation of a CNS-specific tRNA causes  
19 neurodegeneration. *Science (New York, N.Y.)* **345**, 455-459, doi:10.1126/science.1249749  
20 (2014).
- 21 40 Tshori, S., Razin, E. & Nechushtan, H. Amino-acyl tRNA synthetases generate dinucleotide  
22 polyphosphates as second messengers: functional implications. *Topics in current chemistry*  
23 **344**, 189-206, doi:10.1007/128\_2013\_426 (2014).
- 24 41 Ding, Q., Markesbery, W. R., Chen, Q., Li, F. & Keller, J. N. Ribosome Dysfunction Is an  
25 Early Event in Alzheimer's Disease. *The Journal of Neuroscience* **25**, 9171 (2005).
- 26 42 Guo, M. & Schimmel, P. Essential nontranslational functions of tRNA synthetases. *Nature*  
27 *chemical biology* **9**, 145-153, doi:10.1038/nchembio.1158 (2013).
- 28 43 Lanznaster, D., Dal-Cim, T., Piermartiri, T. C. B. & Tasca, C. I. Guanosine: a  
29 Neuromodulator with Therapeutic Potential in Brain Disorders. *Aging and disease* **7**, 657-  
30 679, doi:10.14336/AD.2016.0208 (2016).
- 31 44 Szalay-Beko, M. *et al.* ModuLand plug-in for Cytoscape: determination of hierarchical layers  
32 of overlapping network modules and community centrality. *Bioinformatics (Oxford, England)*  
33 **28**, 2202-2204, doi:10.1093/bioinformatics/bts352 (2012).
- 34 45 Donovan, L. E. *et al.* Analysis of a membrane-enriched proteome from postmortem human  
35 brain tissue in Alzheimer's disease. *Proteomics Clin Appl* **6**, 201-211,  
36 doi:10.1002/prca.201100068 (2012).
- 37 46 Takahashi, M., Iseki, E. & Kosaka, K. Cdk5 and munc-18/p67 co-localization in early stage  
38 neurofibrillary tangles-bearing neurons in Alzheimer type dementia brains. *J Neurol Sci* **172**,  
39 63-69 (2000).
- 40 47 Inoue, M. *et al.* Human brain proteins showing neuron-specific interactions with gamma-  
41 secretase. *The FEBS journal* **282**, 2587-2599, doi:10.1111/febs.13303 (2015).
- 42 48 Uesaka, N. *et al.* Retrograde semaphorin signaling regulates synapse elimination in the  
43 developing mouse brain. *Science* **344**, 1020 (2014).
- 44 49 Brown, C. A. *et al.* In vitro screen of prion disease susceptibility genes using the scrapie cell  
45 assay. *Human molecular genetics* **23**, 5102-5108, doi:10.1093/hmg/ddu233 (2014).
- 46 50 Dempsey, K. M. & Ali, H. H. Identifying aging-related genes in mouse hippocampus using  
47 gateway nodes. *BMC systems biology* **8**, 62, doi:10.1186/1752-0509-8-62 (2014).
- 48 51 Talwar, P. *et al.* Genomic convergence and network analysis approach to identify candidate  
49 genes in Alzheimer's disease. *BMC genomics* **15**, 199, doi:10.1186/1471-2164-15-199 (2014).
- 50 52 Seyfried, N. T. *et al.* A Multi-network Approach Identifies Protein-Specific Co-expression in  
51 Asymptomatic and Symptomatic Alzheimer's Disease. *Cell systems* **4**, 60-72.e64,  
52 doi:10.1016/j.cels.2016.11.006 (2017).



JX iTRAQ

1

2 **Supplementary Information** is available in the online version of this paper

3

4 **Acknowledgements** The authors would like to thank the families and patients who supported this  
5 research by donation of brains to the New Zealand Neurological Foundation Human Brain Bank.  
6 This work was supported by Alzheimer's Research UK (ARUK-PPG2014B-7), the New Zealand  
7 Neurological Foundation, the Maurice Wilkins Centre for Molecular Biodiscovery (Tertiary  
8 Education Commission 9431-48507; and Doctoral Scholarship funding to Jingshu Xu), the  
9 University of Auckland (Doctoral Student funding to Jingshu Xu - JXU058 PReSS) and was  
10 facilitated by the Manchester Biomedical Research Centre and the Greater Manchester  
11 Comprehensive Local Research Network.

12

13 **Author Contributions** J.X., S.P., N.R., I.R-G., B.D.H, and H.W. performed the experiments  
14 presented in this manuscript. Initial Bayesian data analysis was developed by A.M.P., A.W.D. and  
15 R.D.U. R.H. and P.B. build the web-based data resource. J.X., A.S. and R.D.U. performed data  
16 interpretation and network analysis. R.L.M.F., G.J.S.C. and R.D.U. supervised the project. All  
17 authors wrote the manuscript.

18

19 **Author information** The authors declare no competing financial interests. Correspondence and  
20 request for materials, methods or data should be addressed to R.U. (r.unwin@manchester.ac.uk).

21



**Brain sample collection**

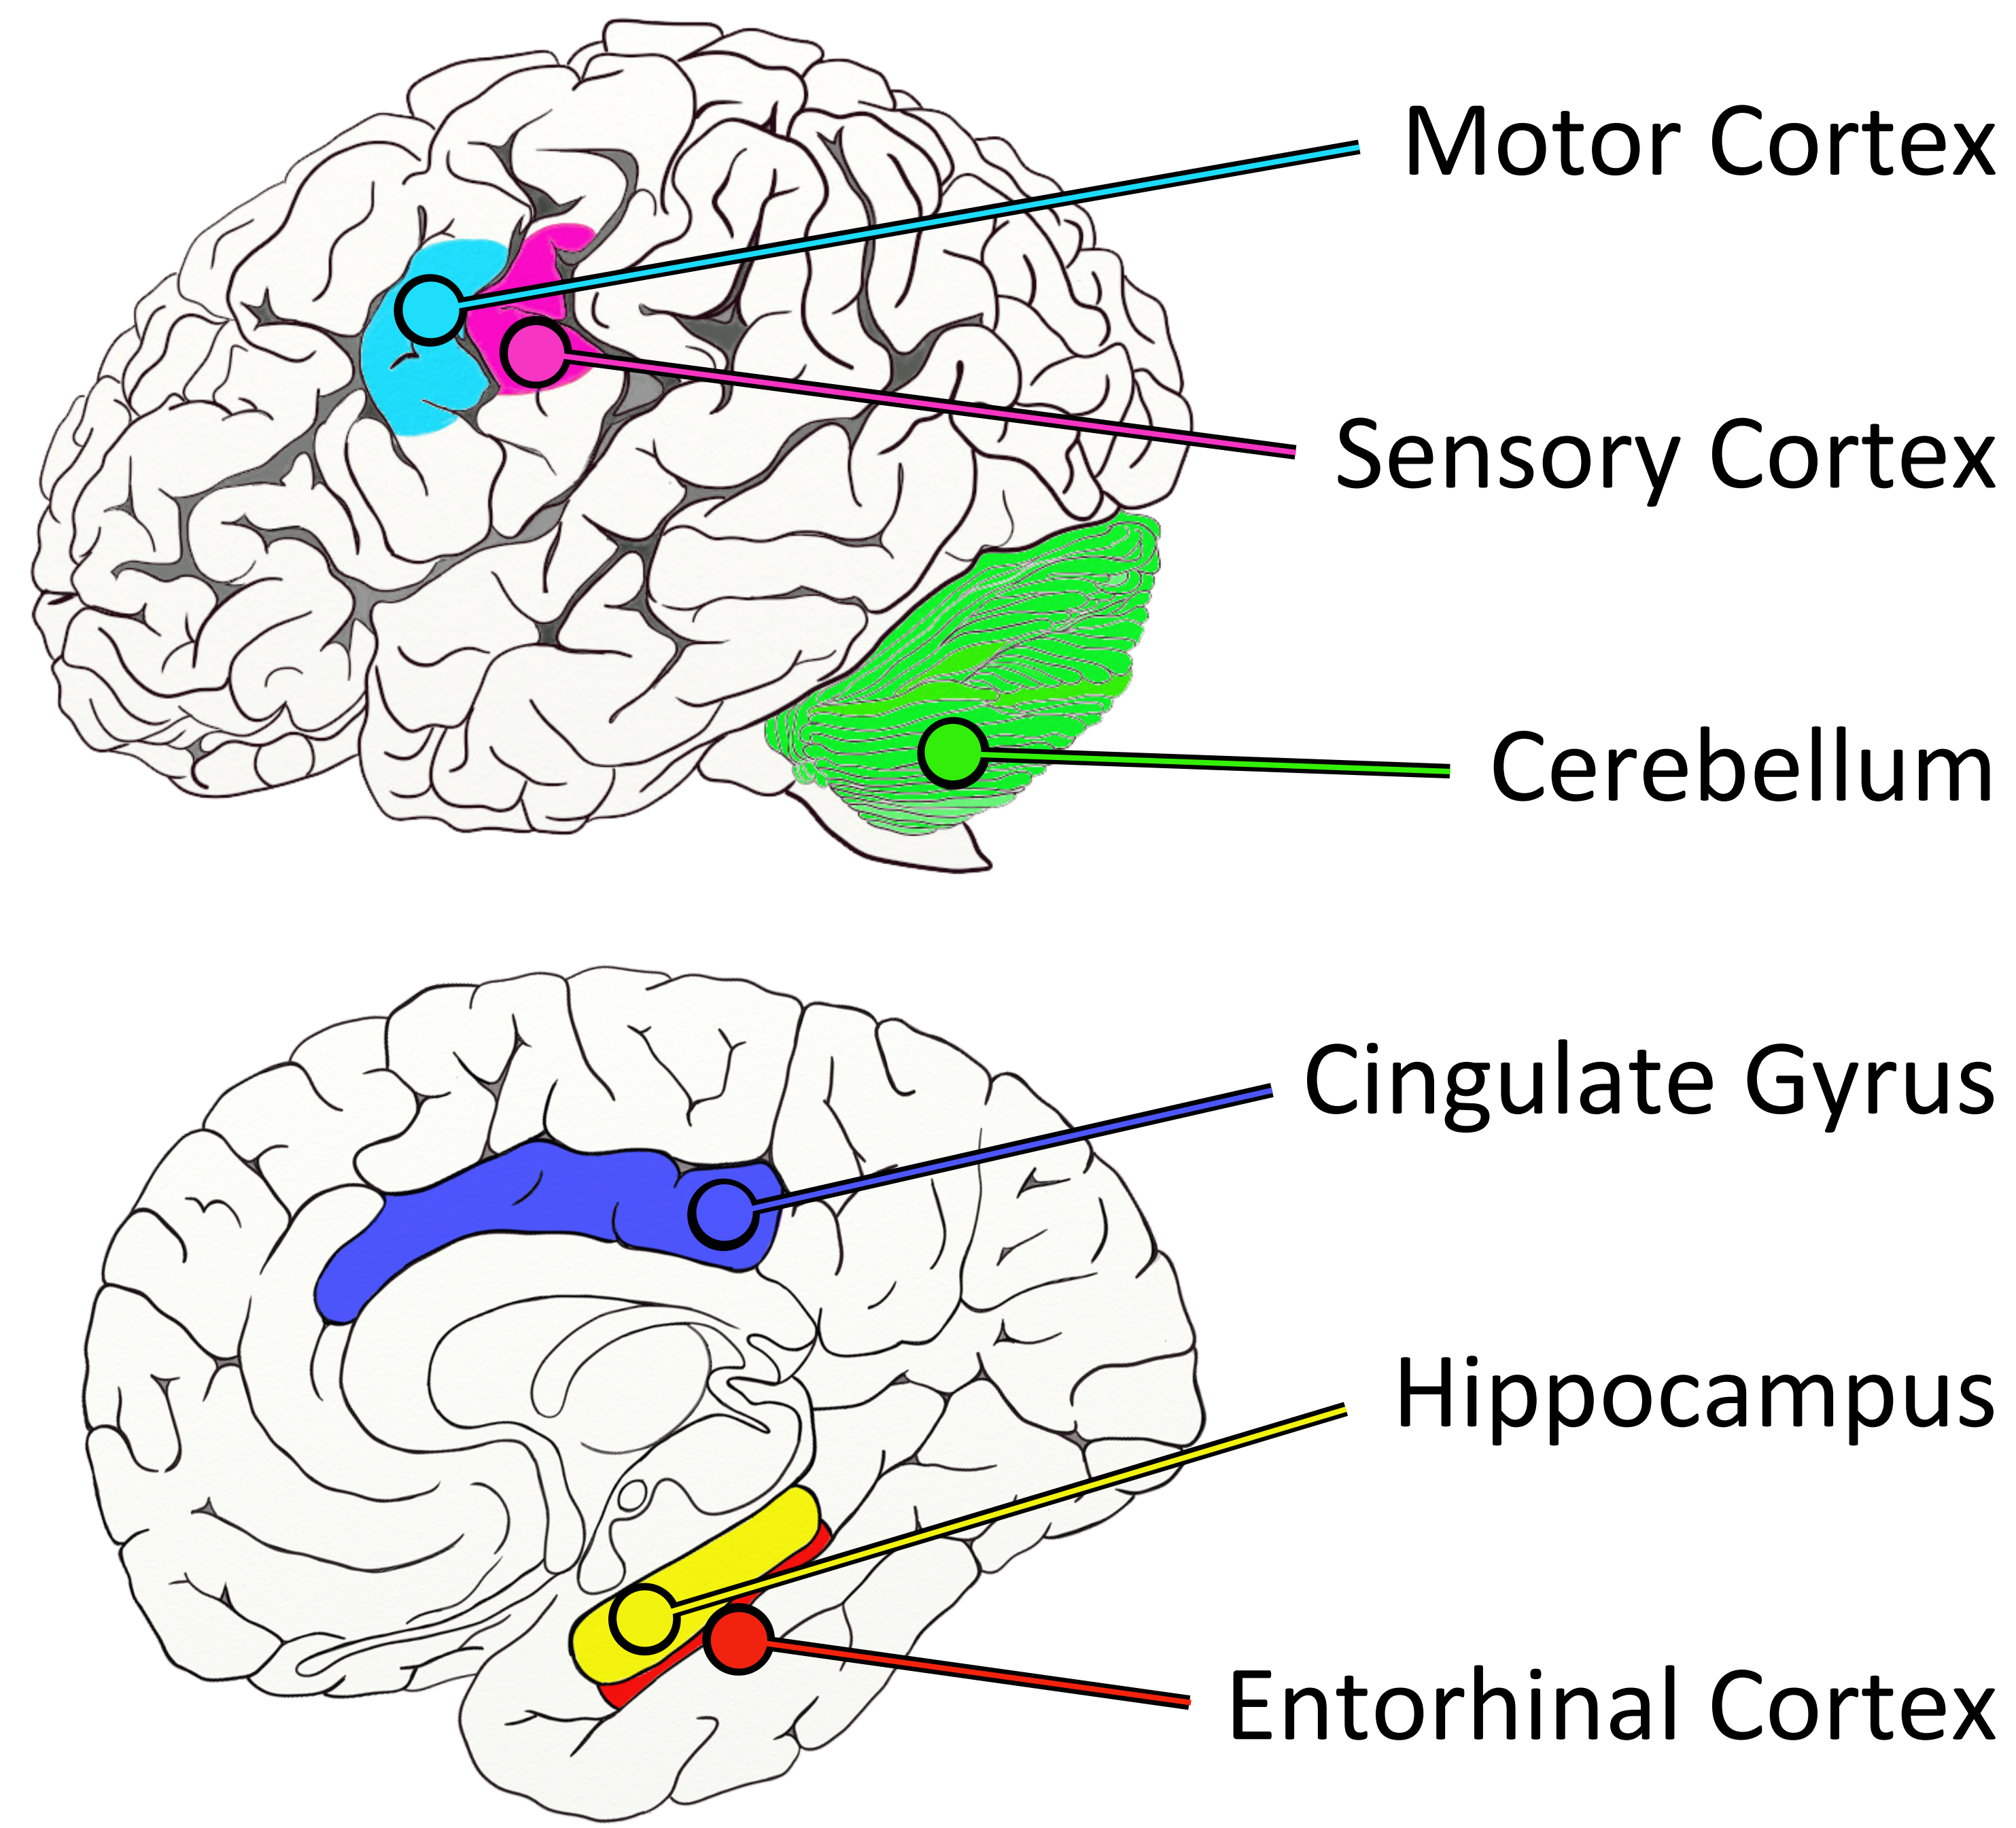

**Sample preparation**

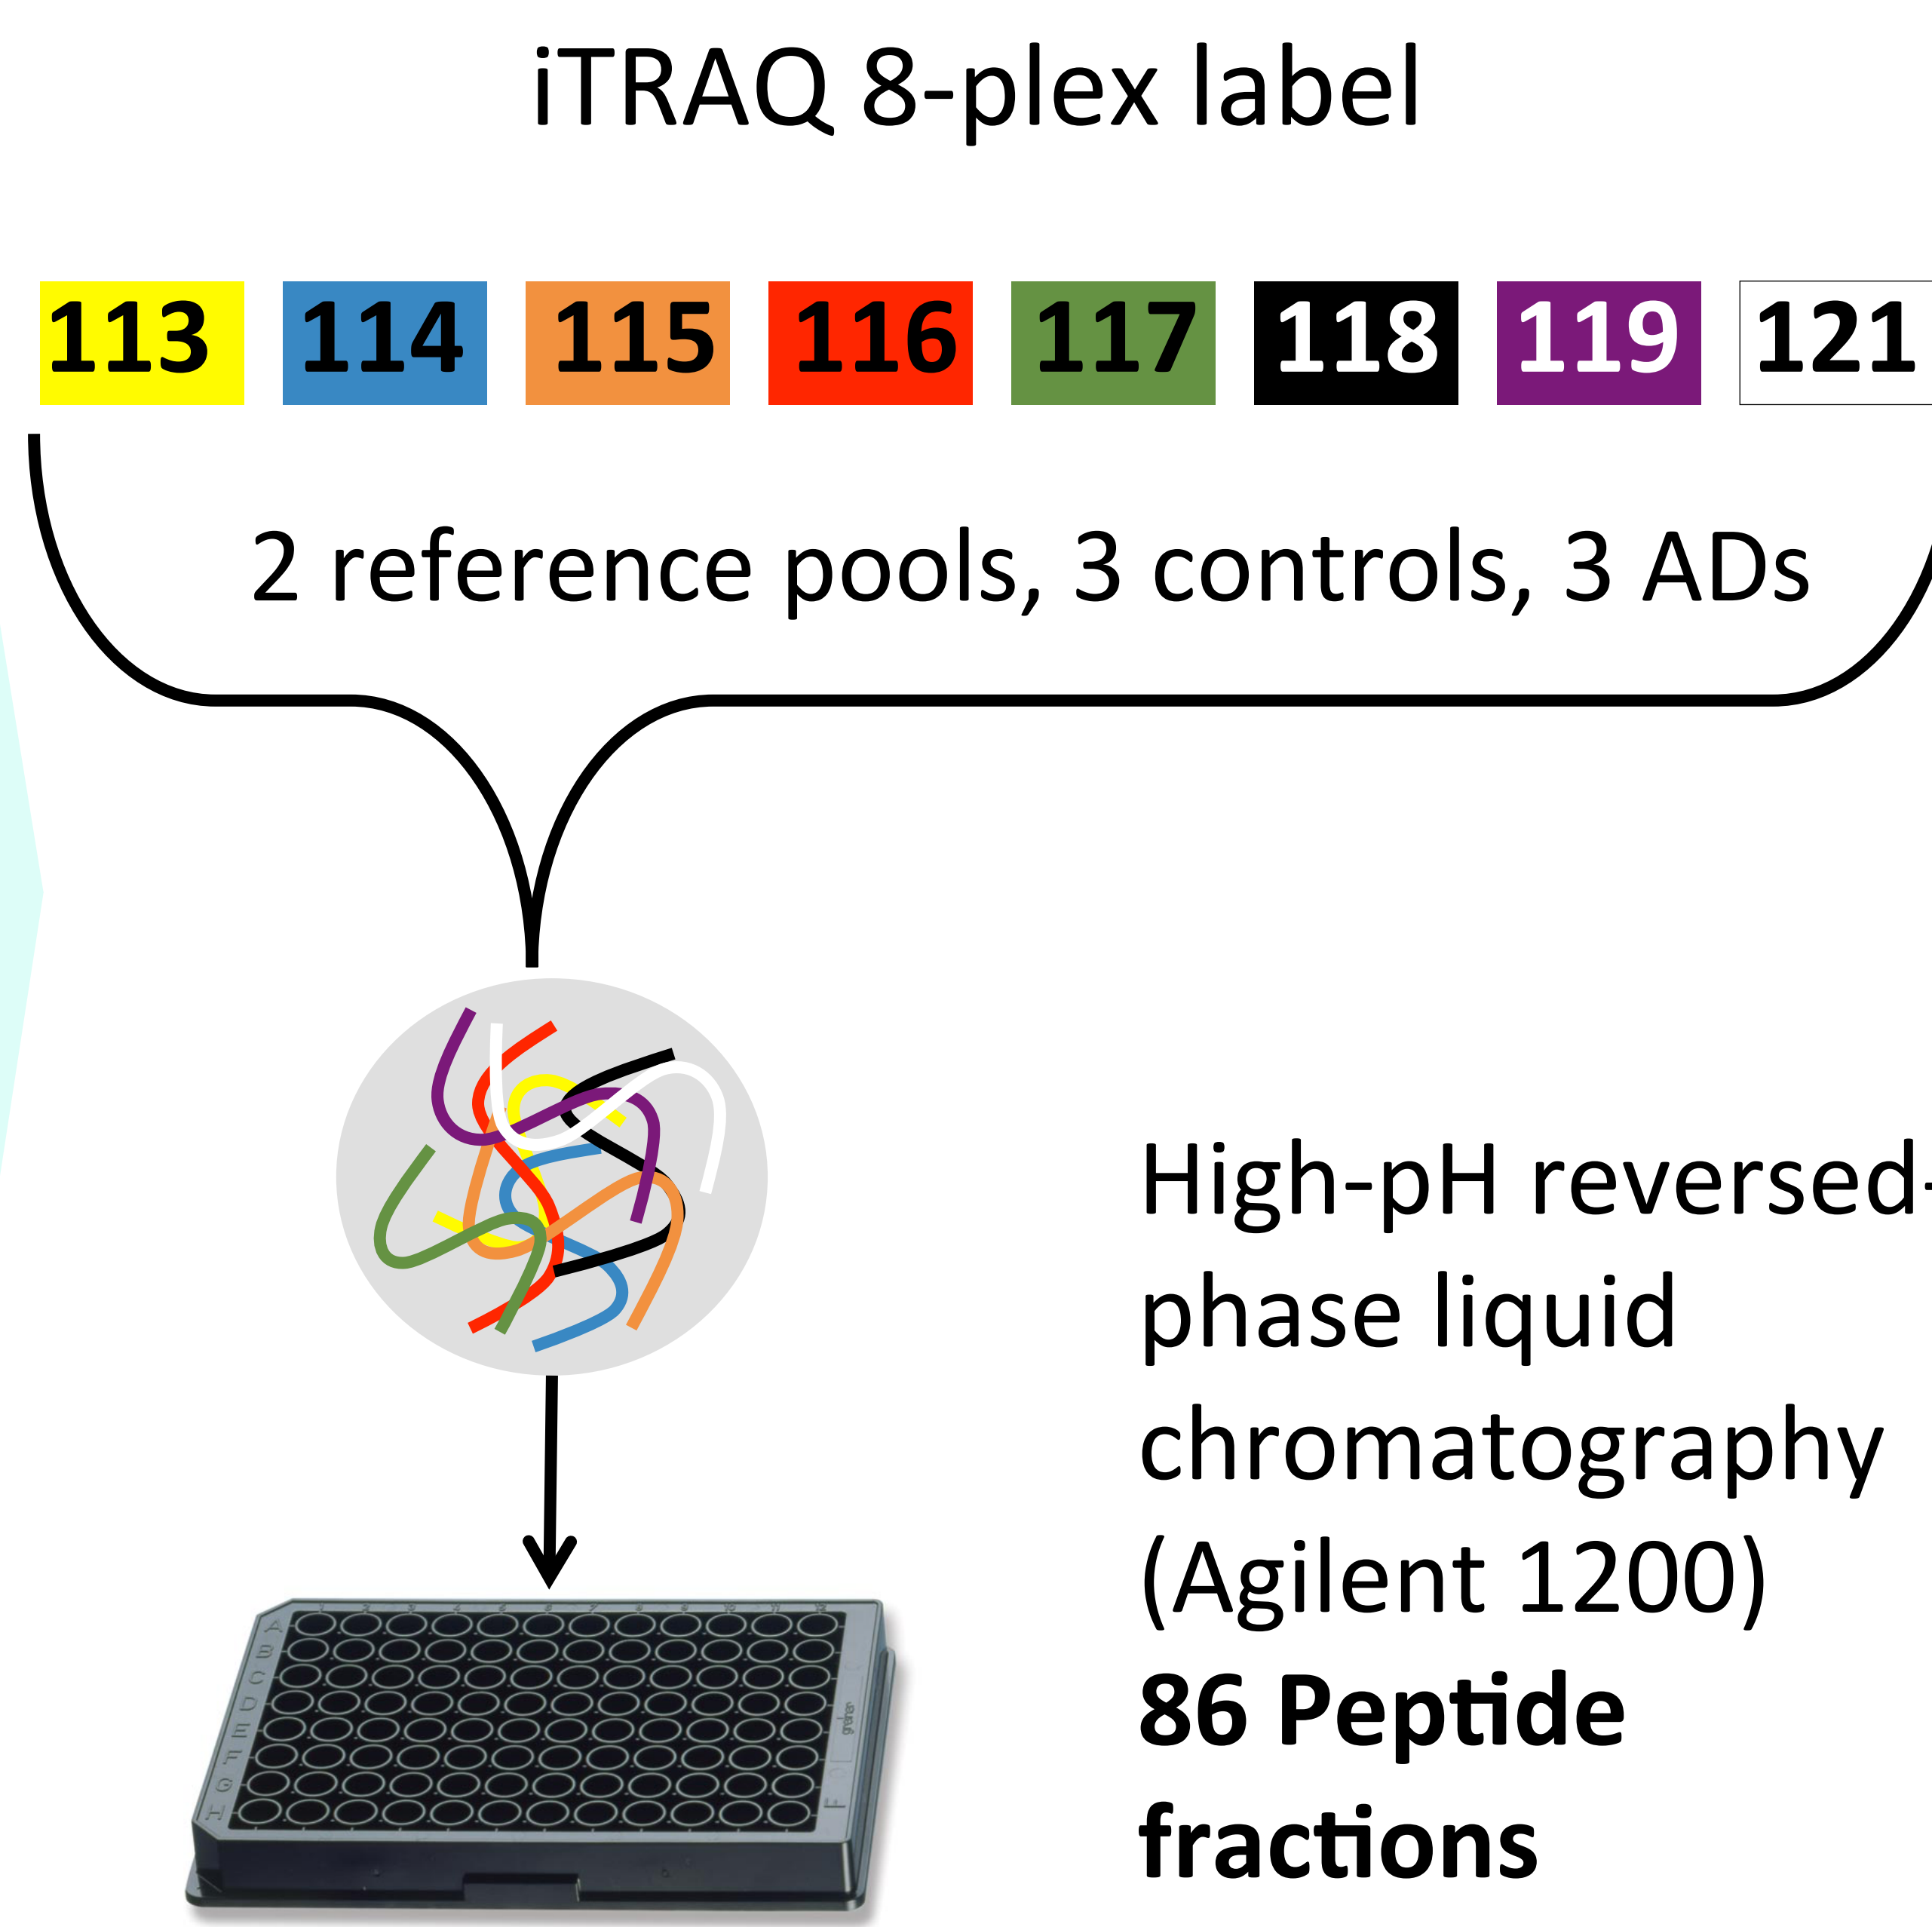

**MS data acquisition**

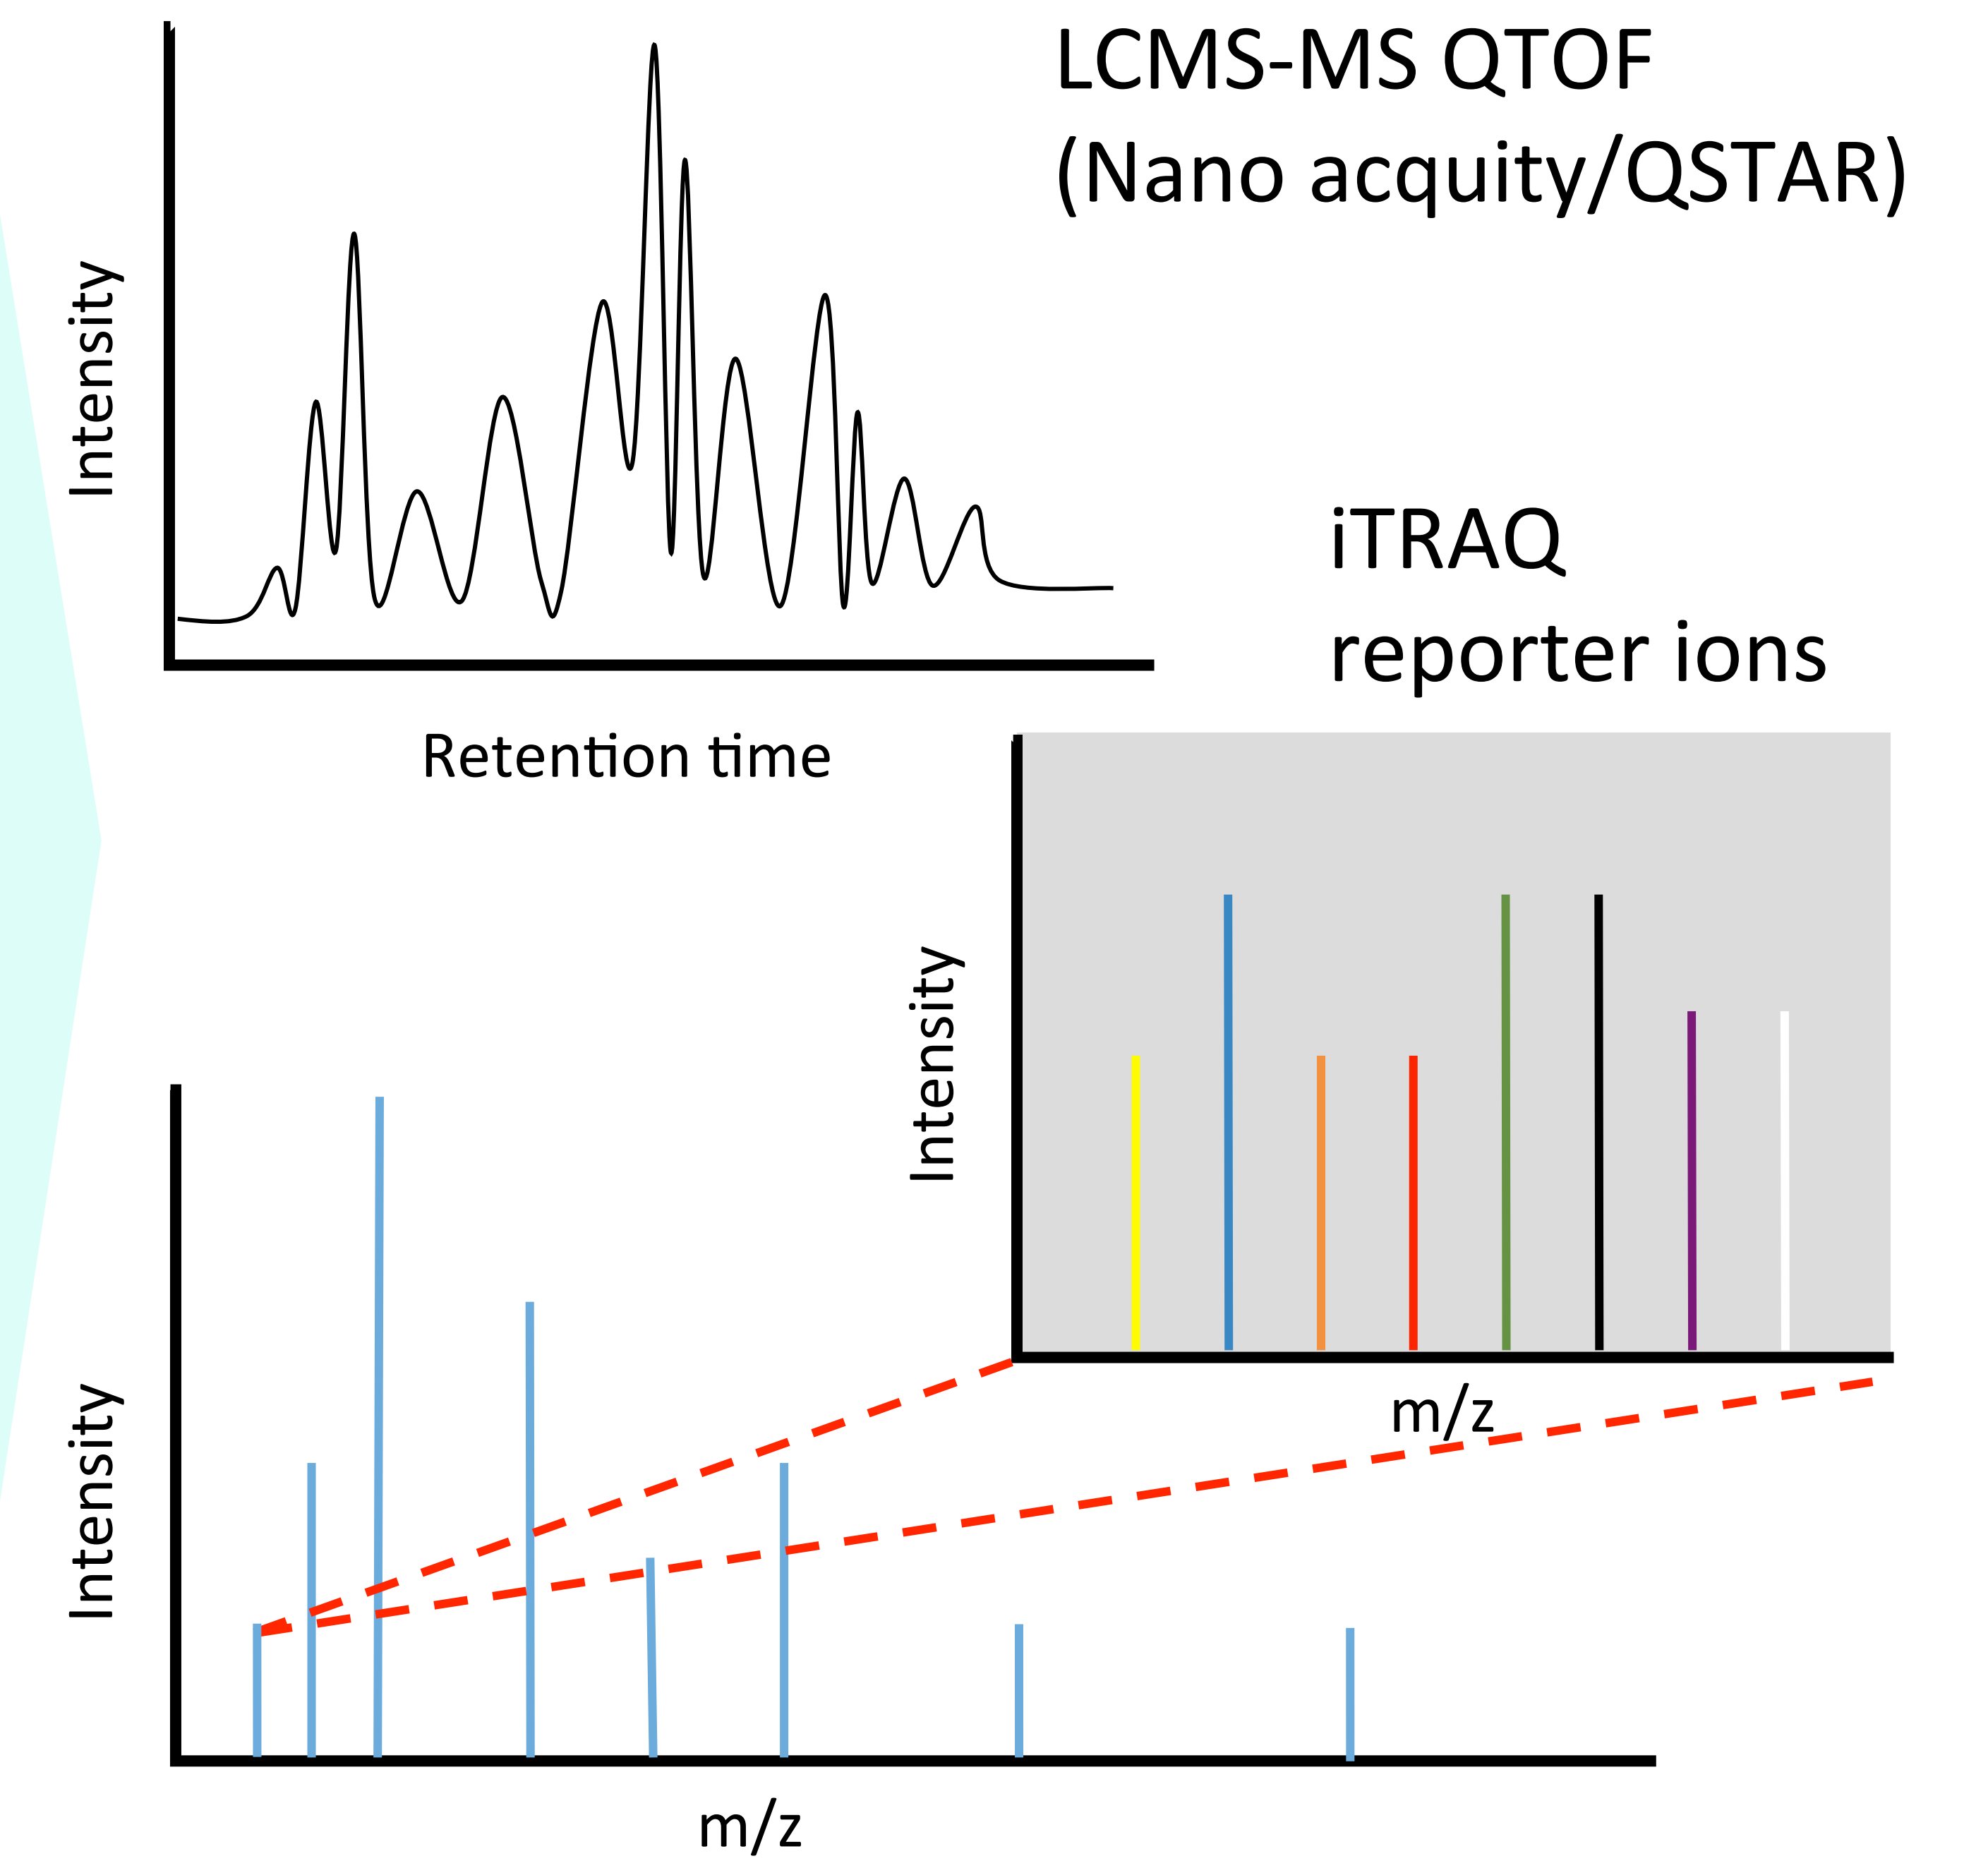

**Data analysis**

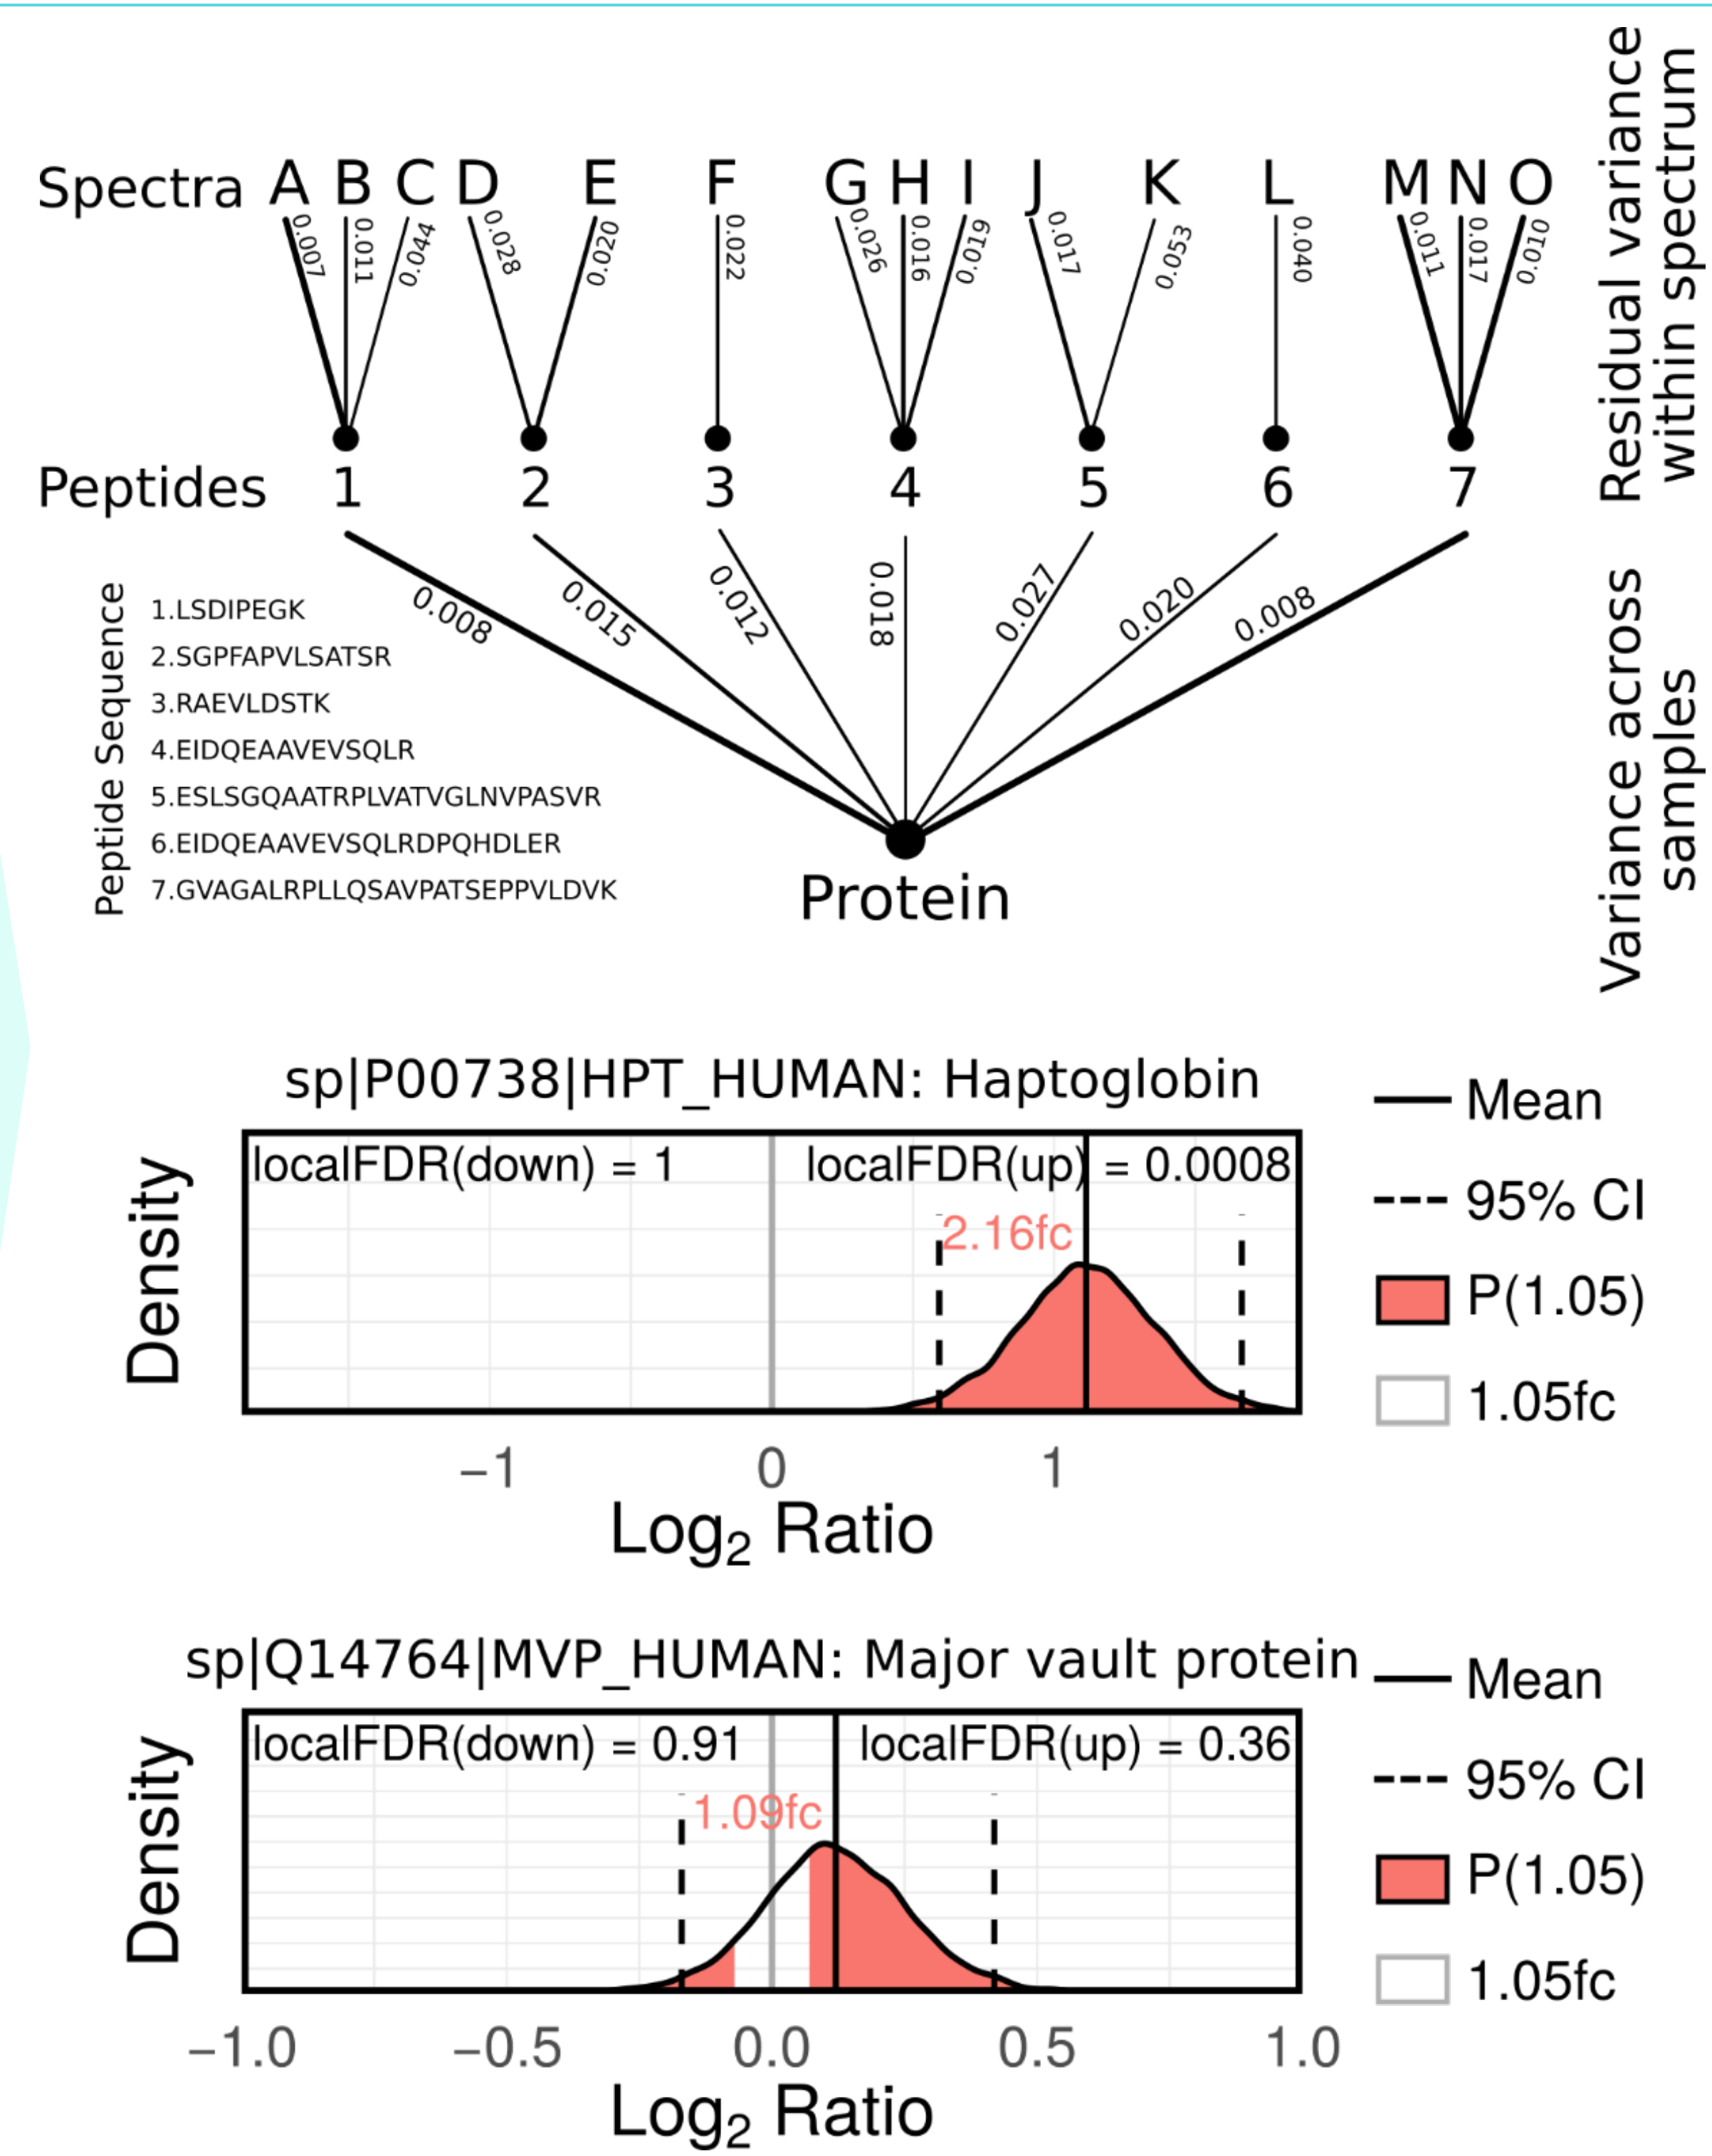

**Public database**

**Website**

[www.manchester.ac.uk/dementia-proteomes-project](http://www.manchester.ac.uk/dementia-proteomes-project)

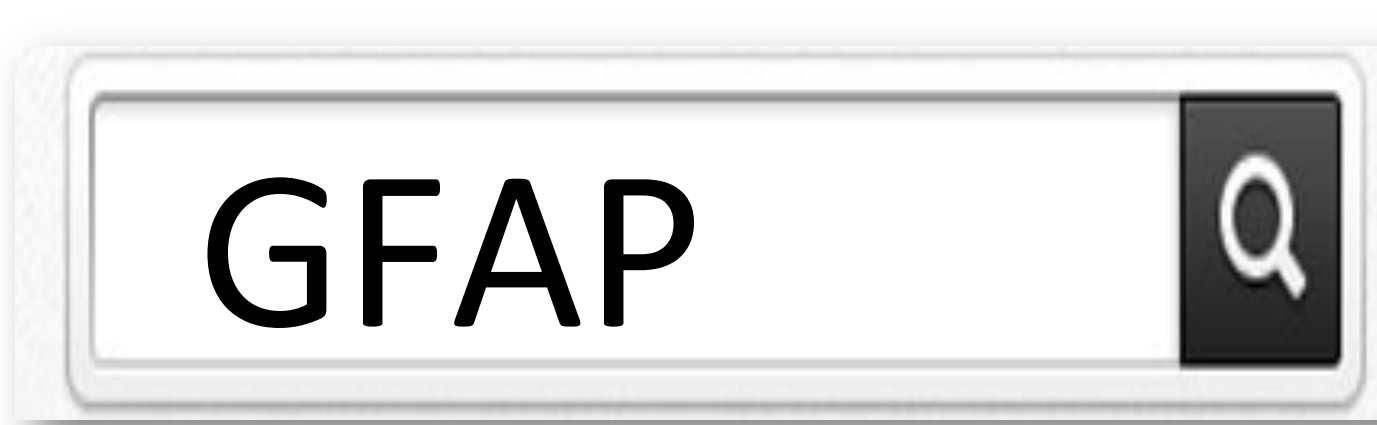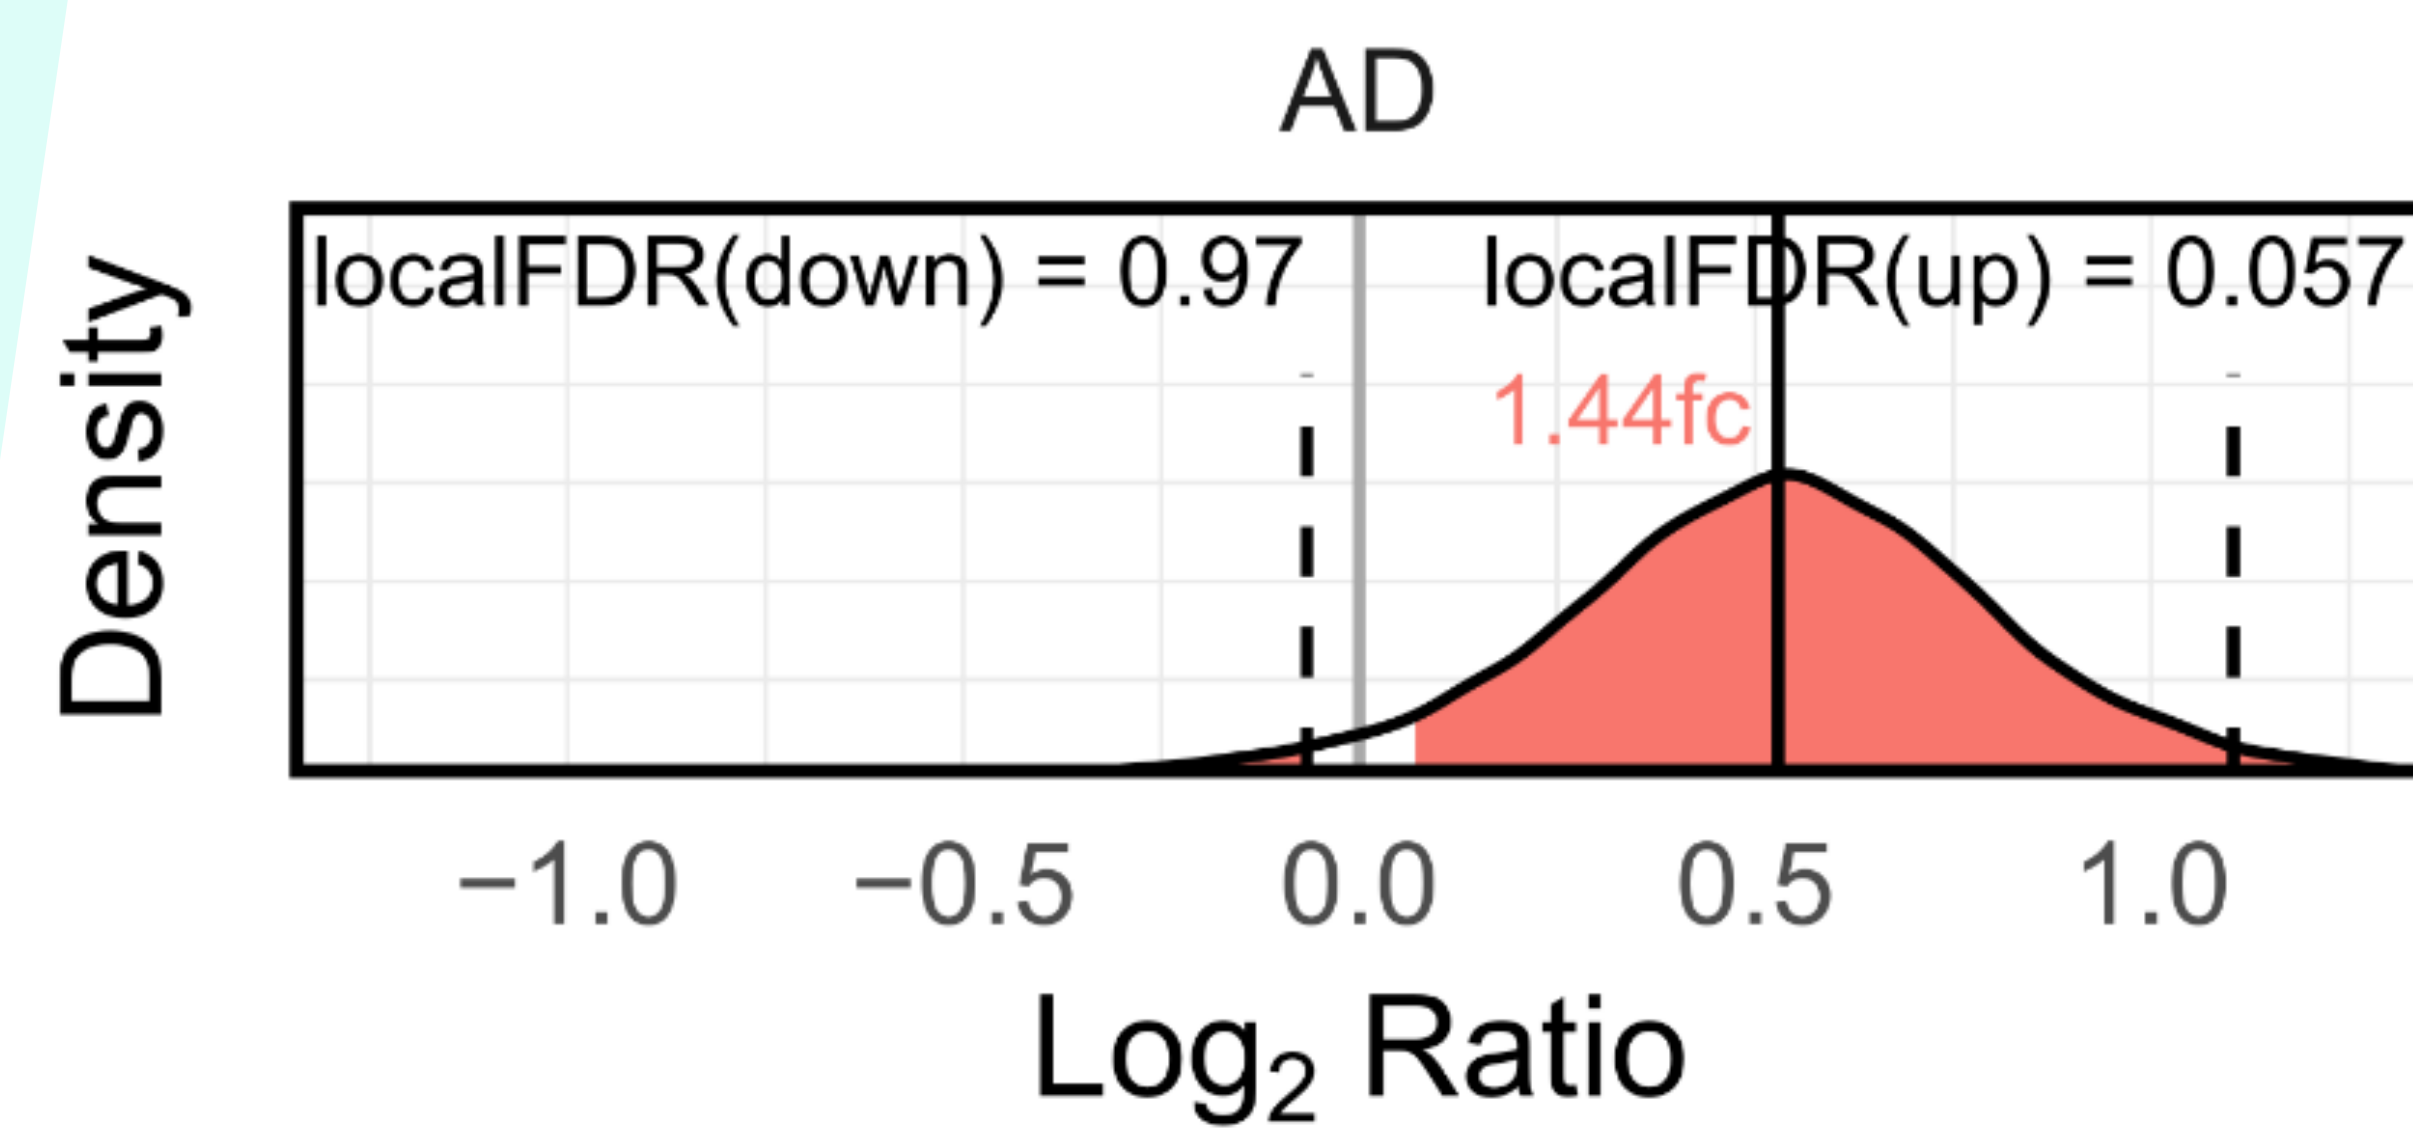

| Name | Description                       | SwissProt_AC | SwissProt_ID |
|------|-----------------------------------|--------------|--------------|
| GFAP | P1Glial fibrillary acidic protein | 4136         | GFAP_HUMAN   |

|     | Peptides | Spectra | Log2(fc) | lower  | upper | localFDR | globalFDR |
|-----|----------|---------|----------|--------|-------|----------|-----------|
| HIP | 95       | 1829    | 0.529    | -0.066 | 1.104 | 0.057    | 0.021     |
| MC  | 44       | 590     | 0.199    | -0.248 | 0.662 | 0.266    | 0.140     |
| SC  | 57       | 821     | 0.096    | -0.331 | 0.544 | 0.448    | 0.260     |
| CER | 61       | 794     | 0.211    | -0.153 | 0.571 | 0.195    | 0.088     |
| ERC | 70       | 1045    | 0.492    | -0.079 | 1.084 | 0.068    | 0.028     |
| CG  | 54       | 1211    | 0.469    | -0.169 | 1.094 | 0.096    | 0.040     |

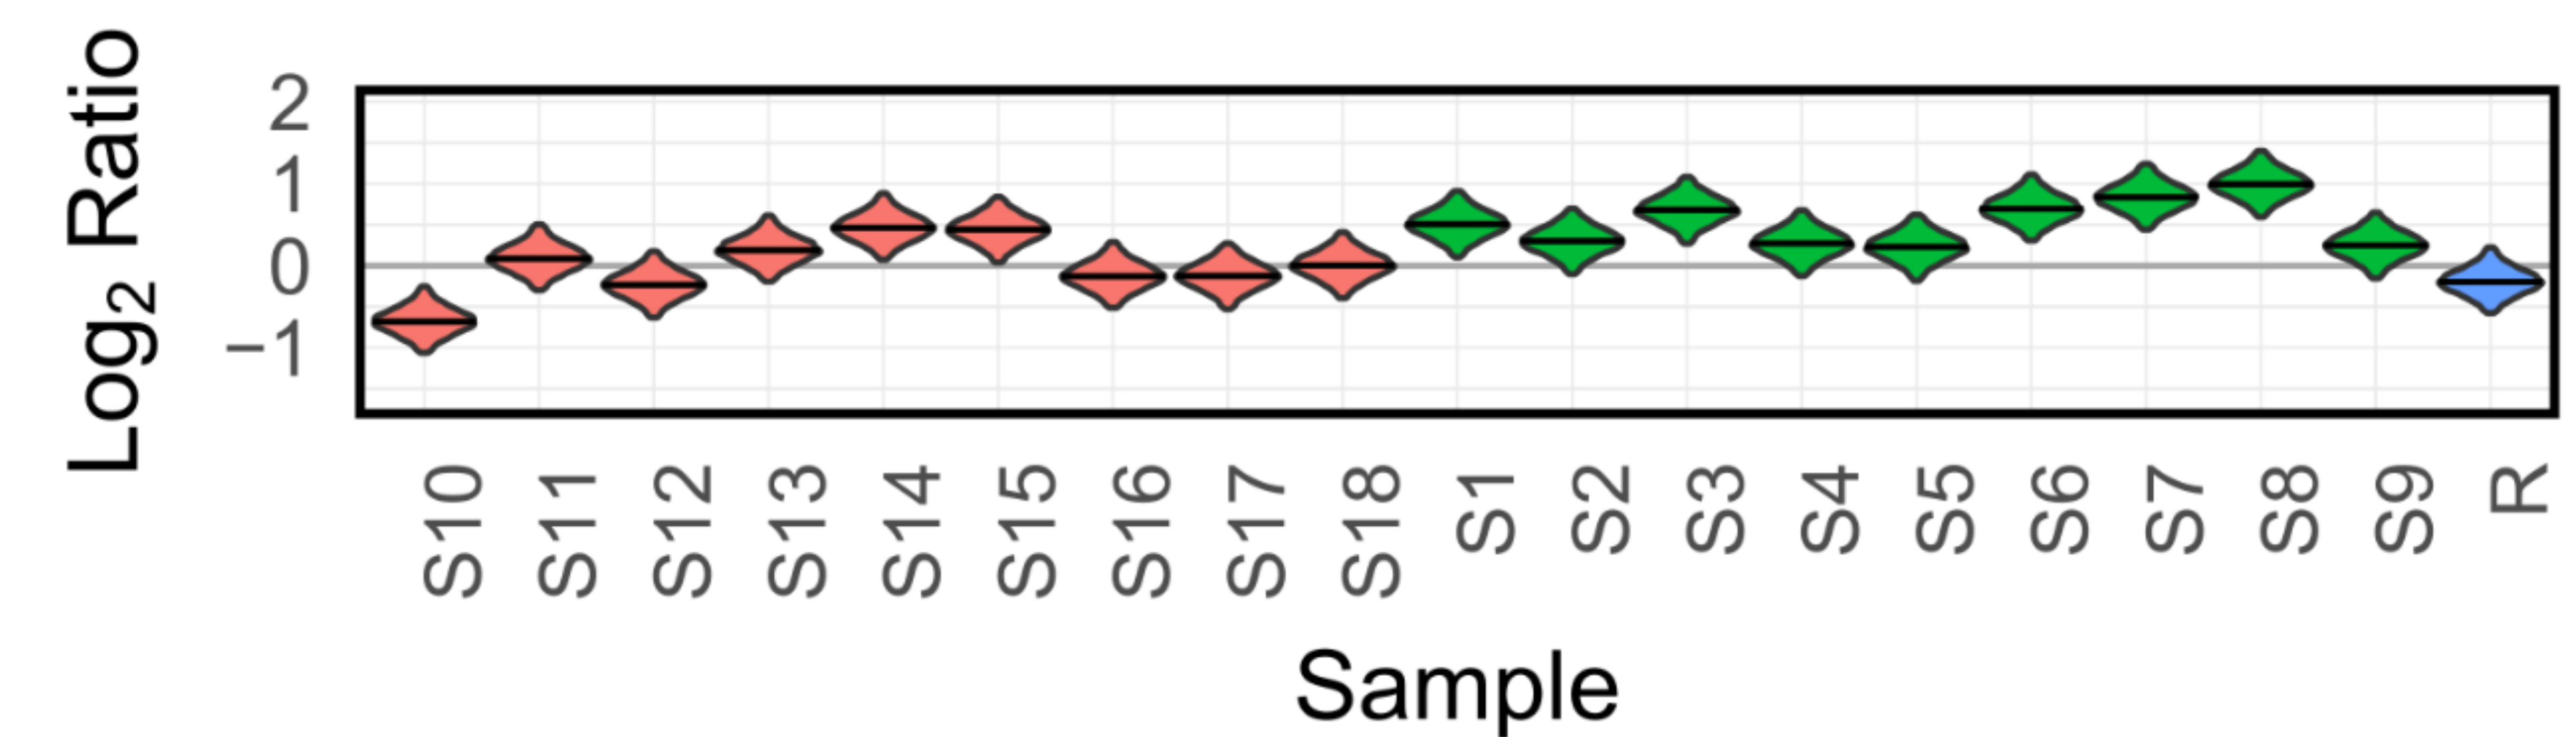



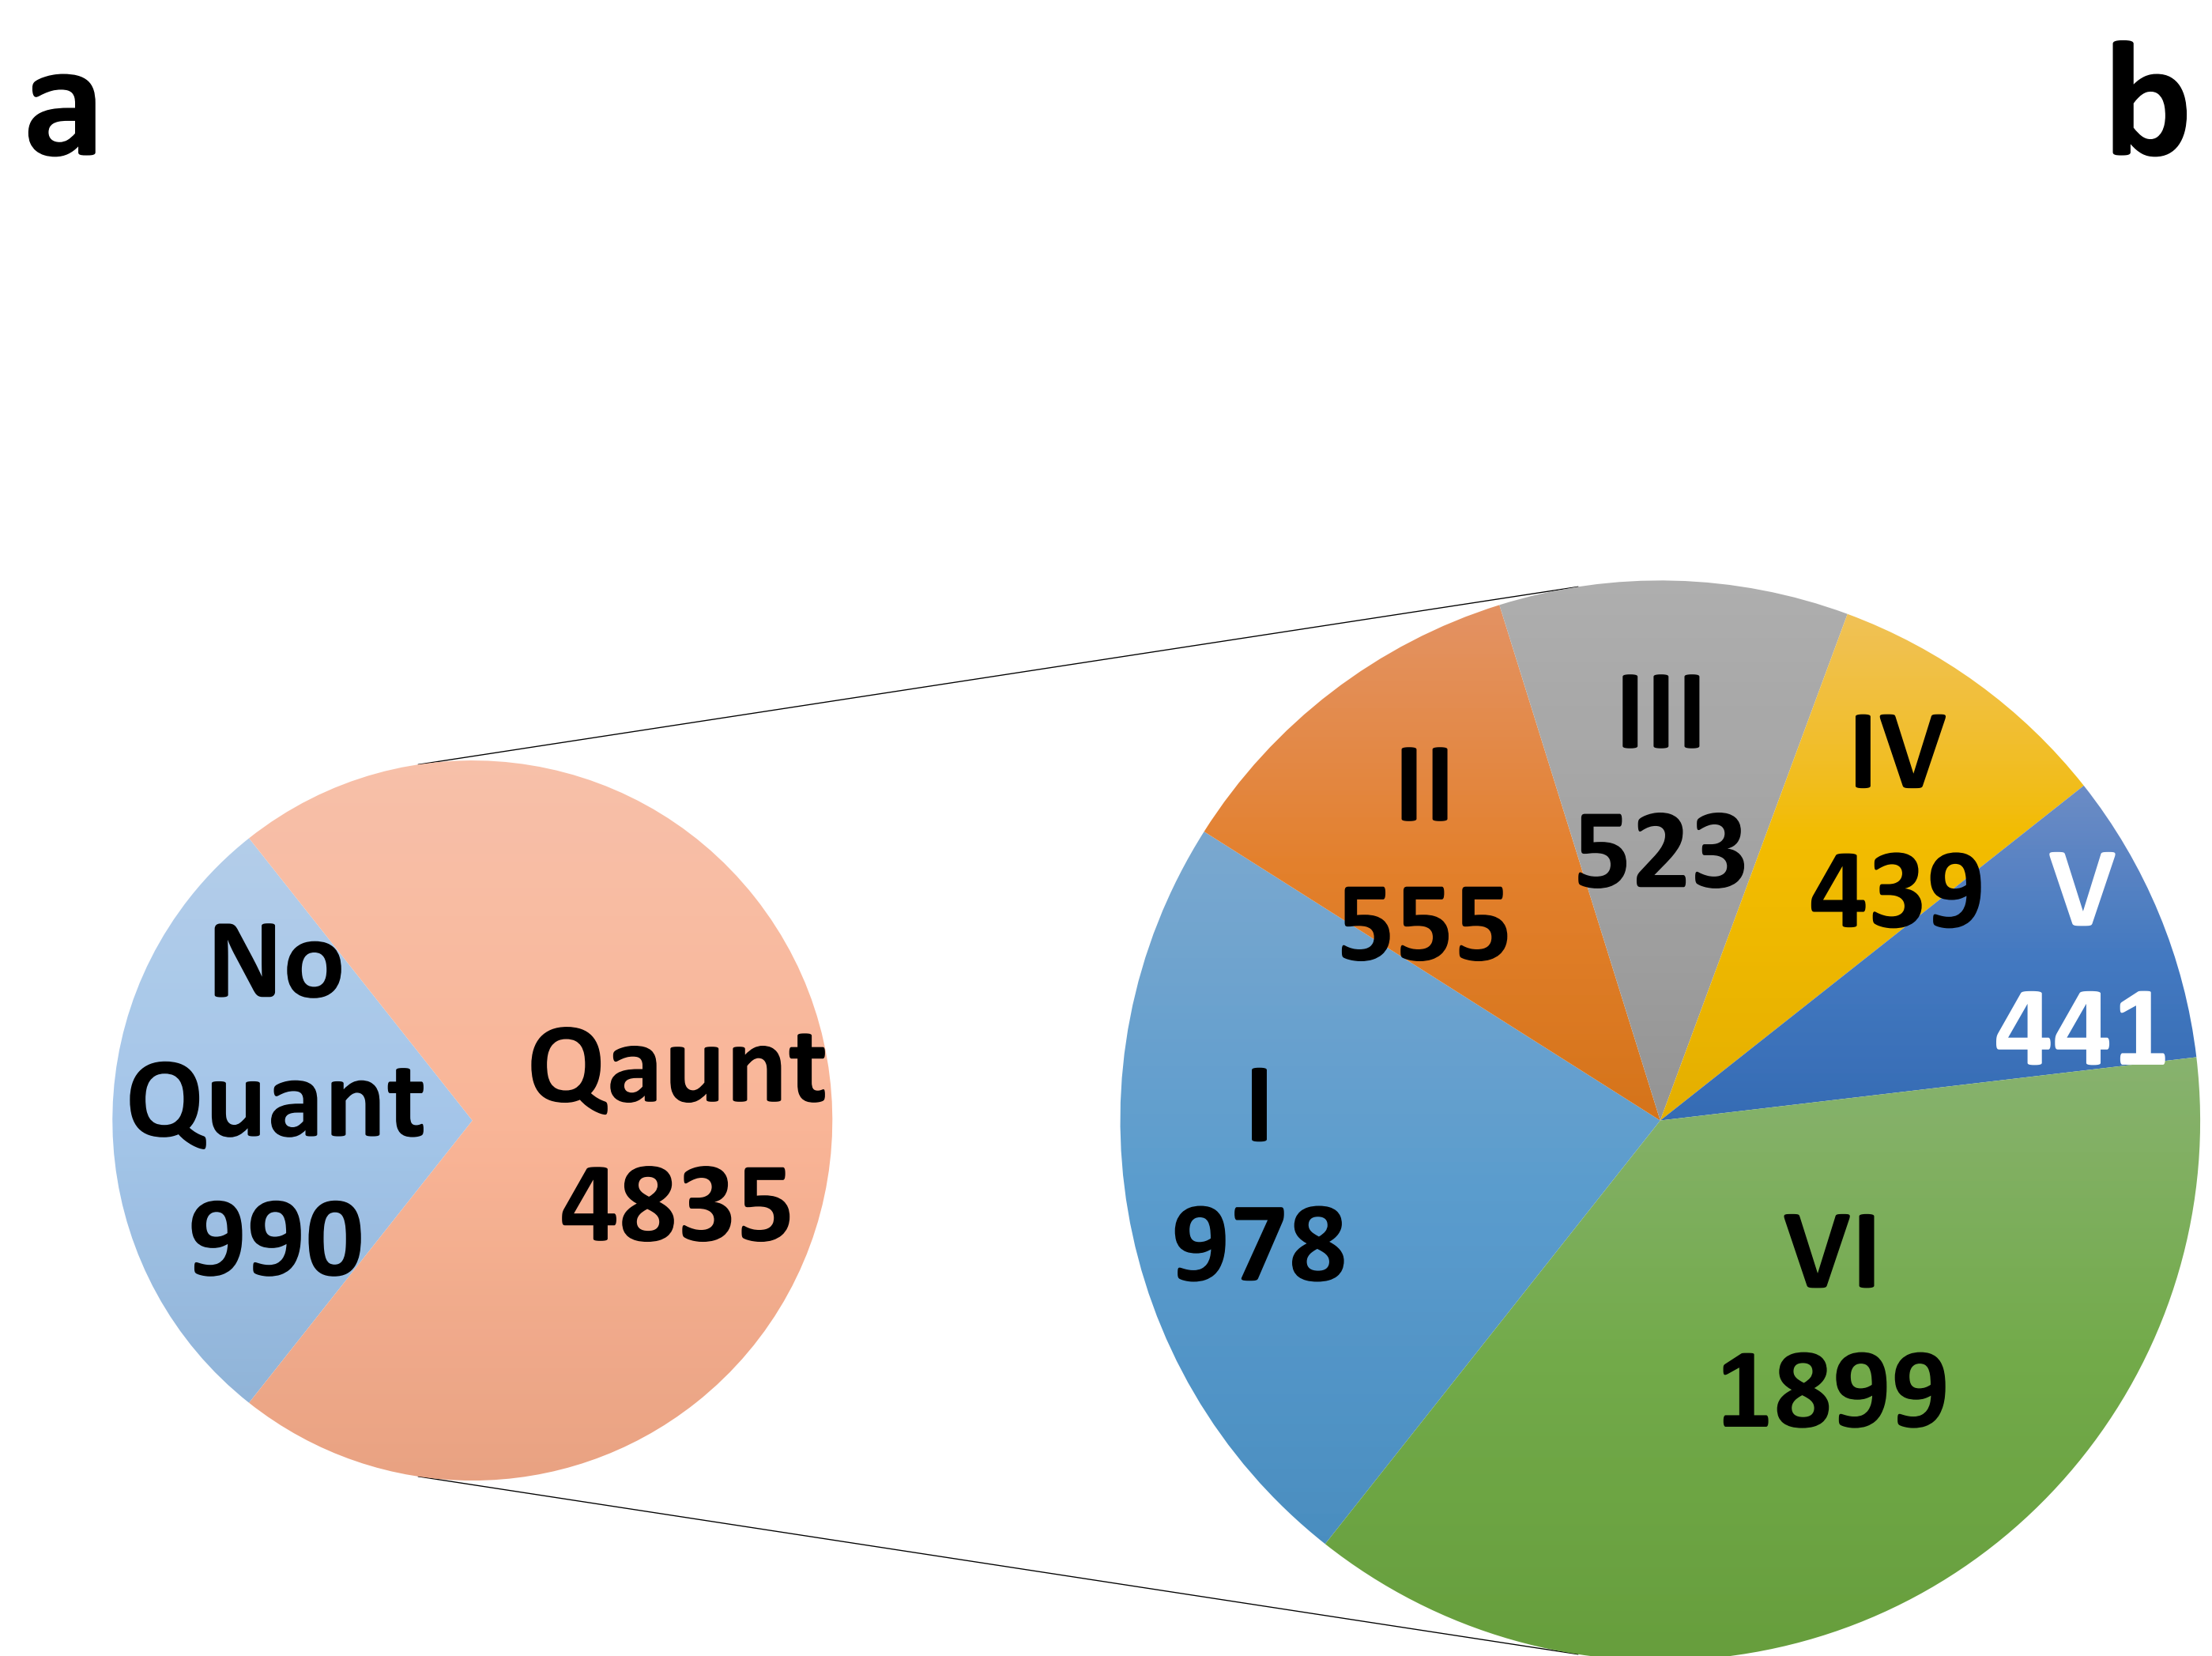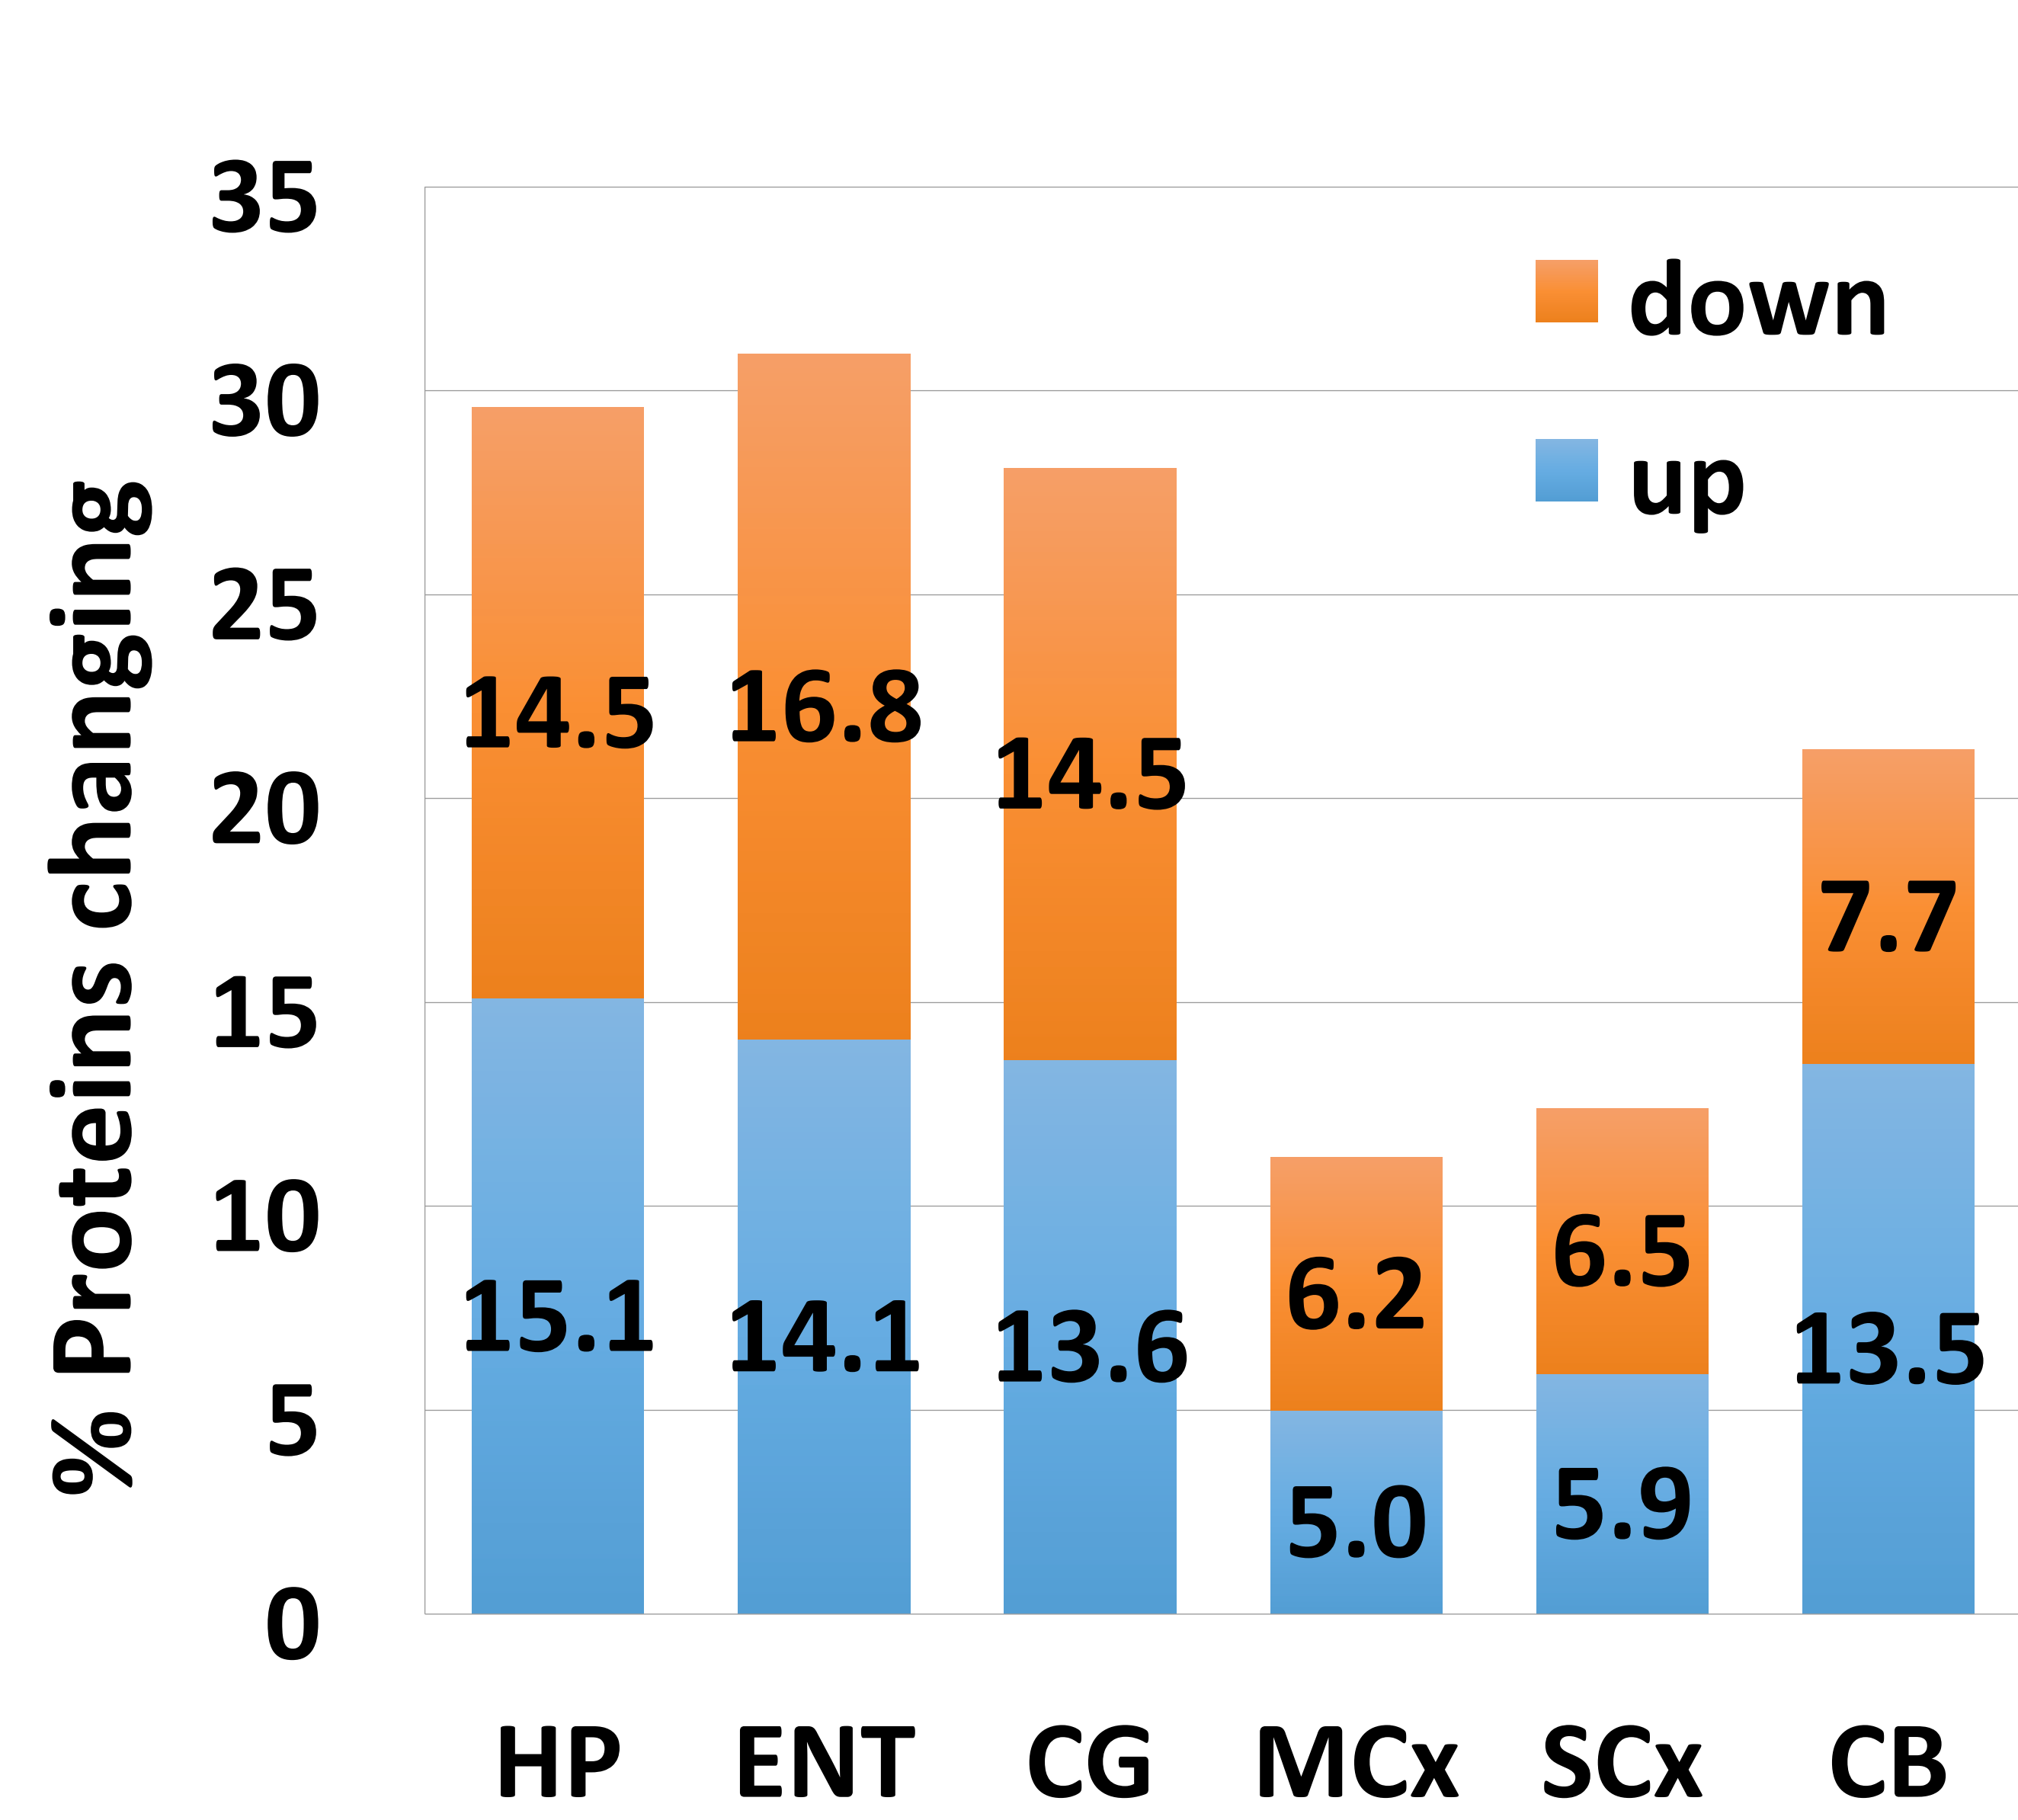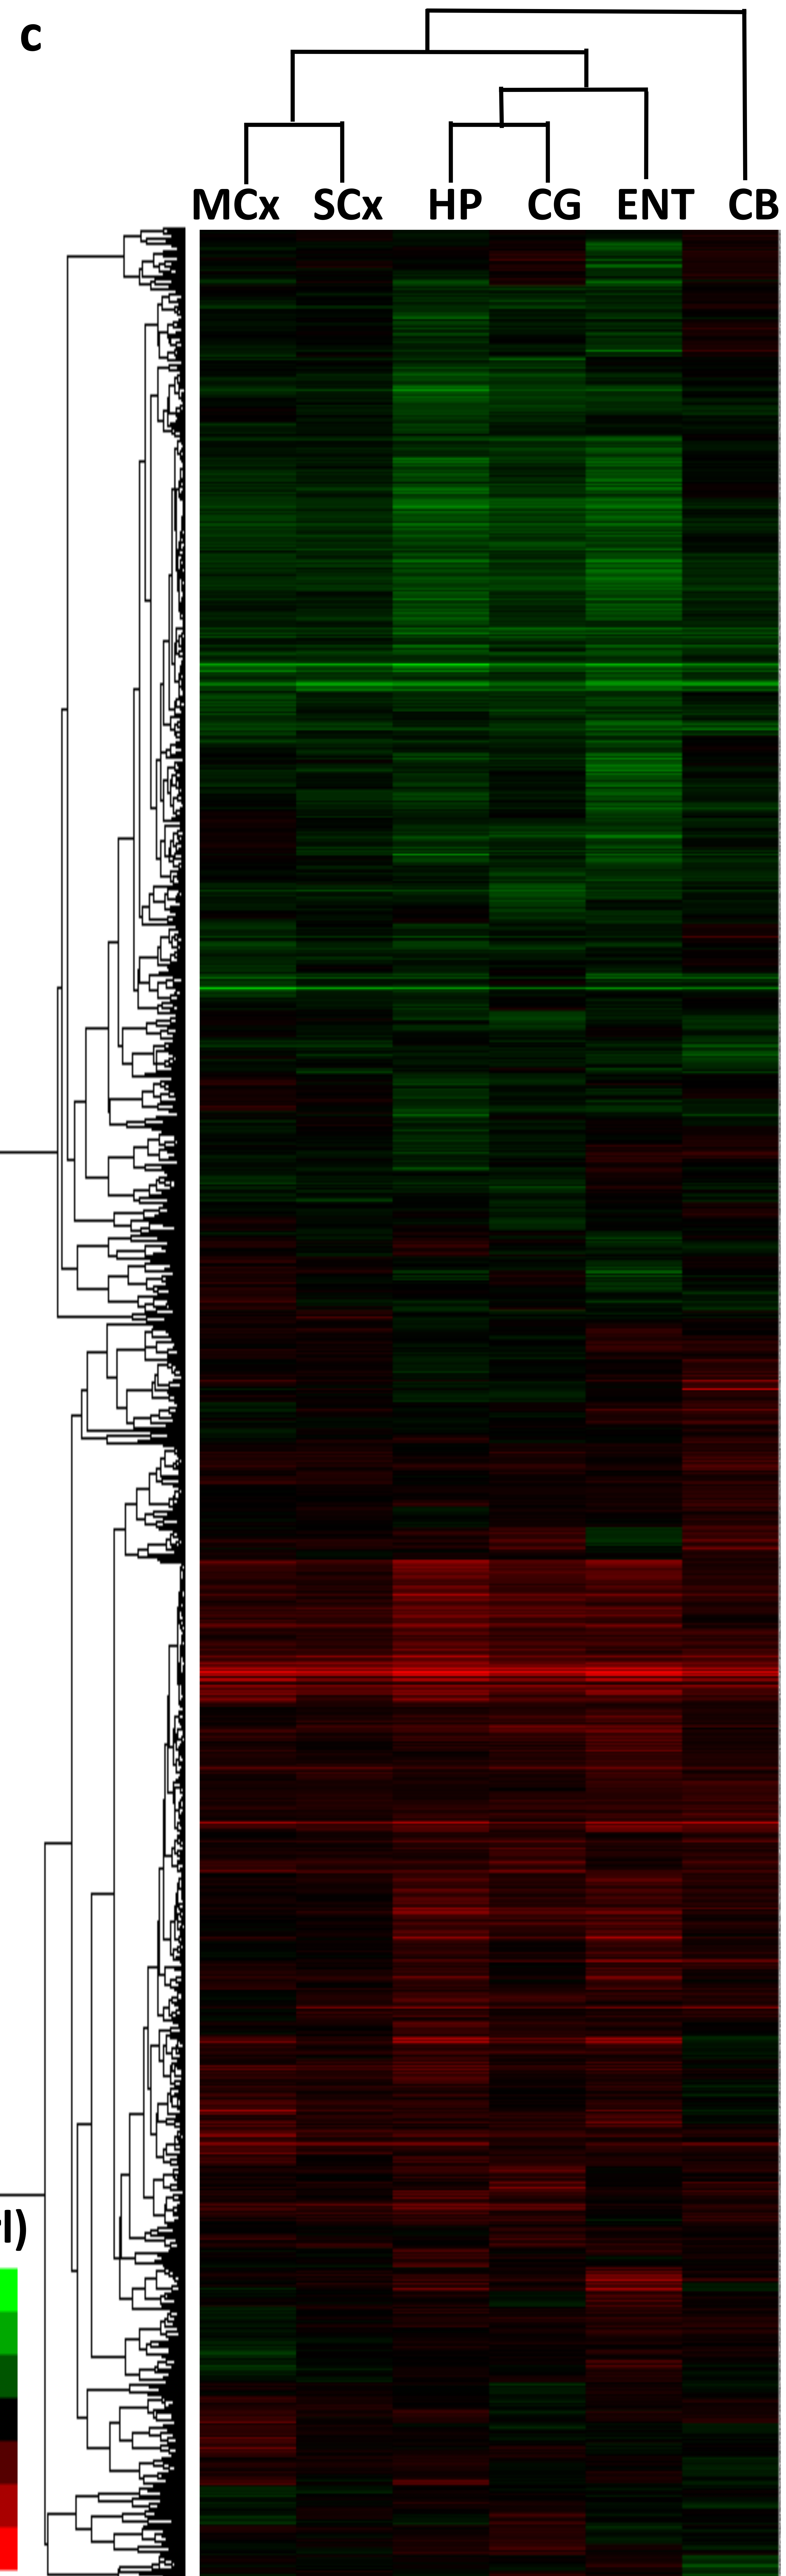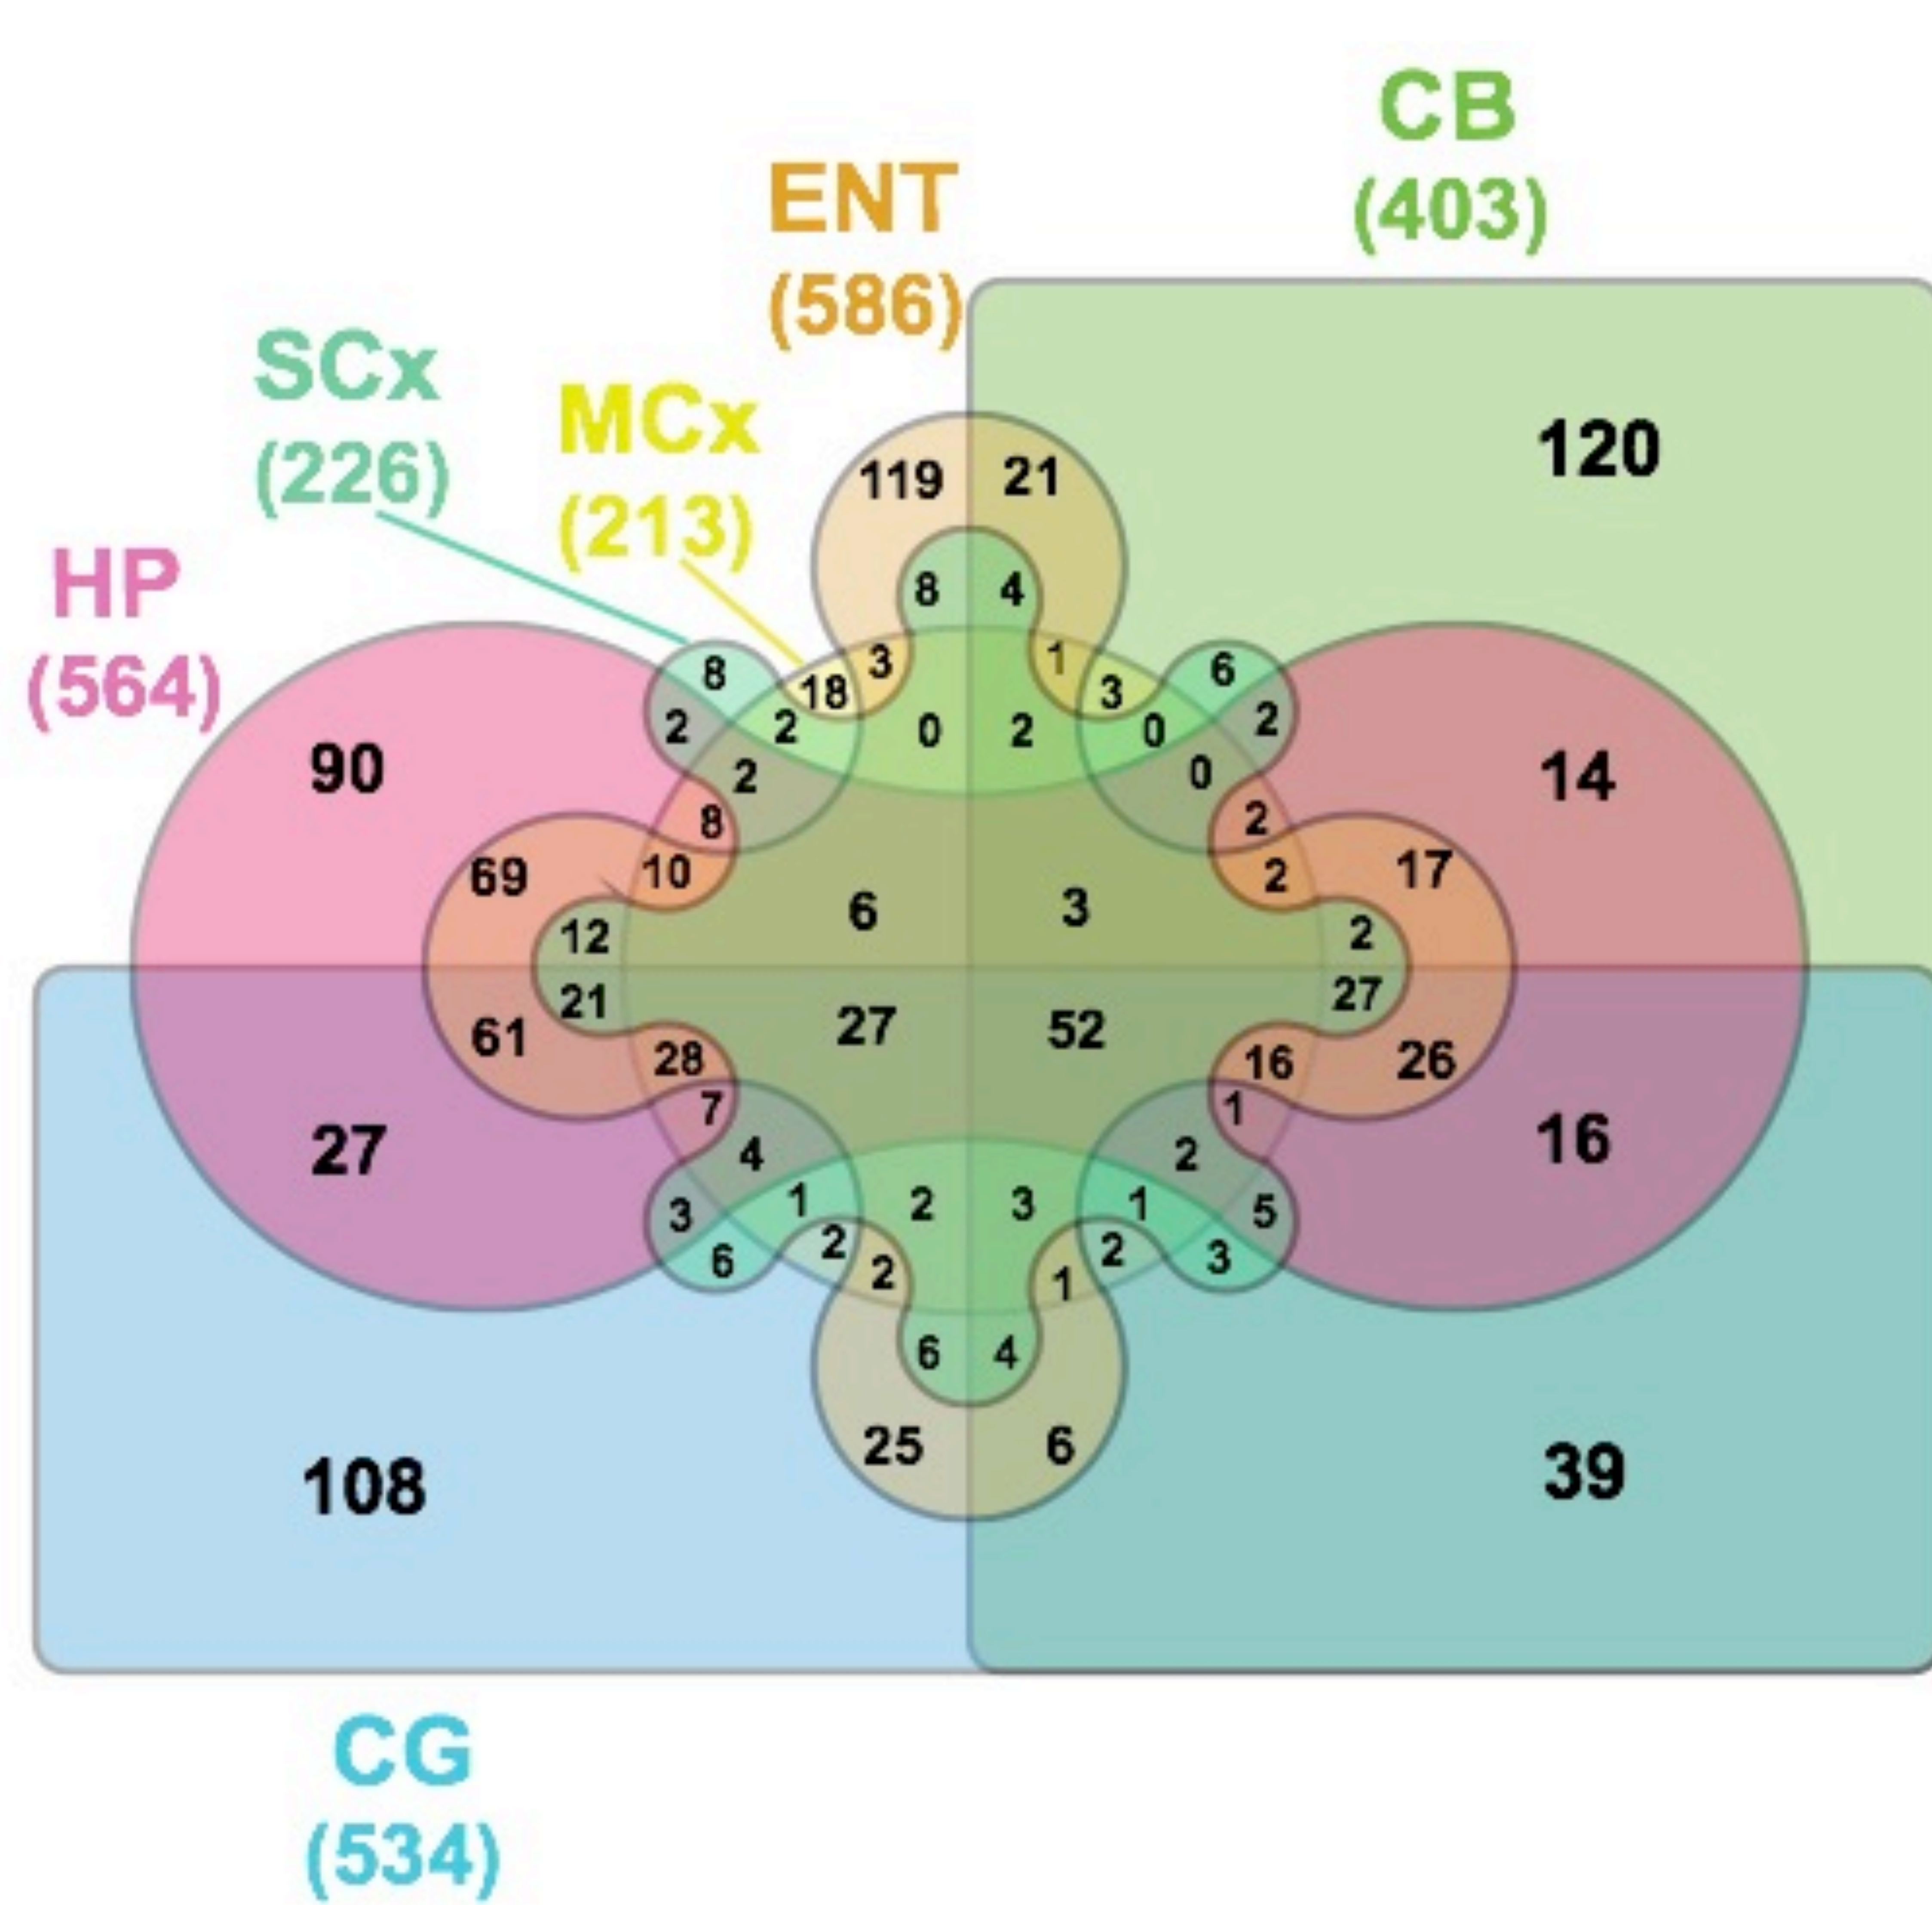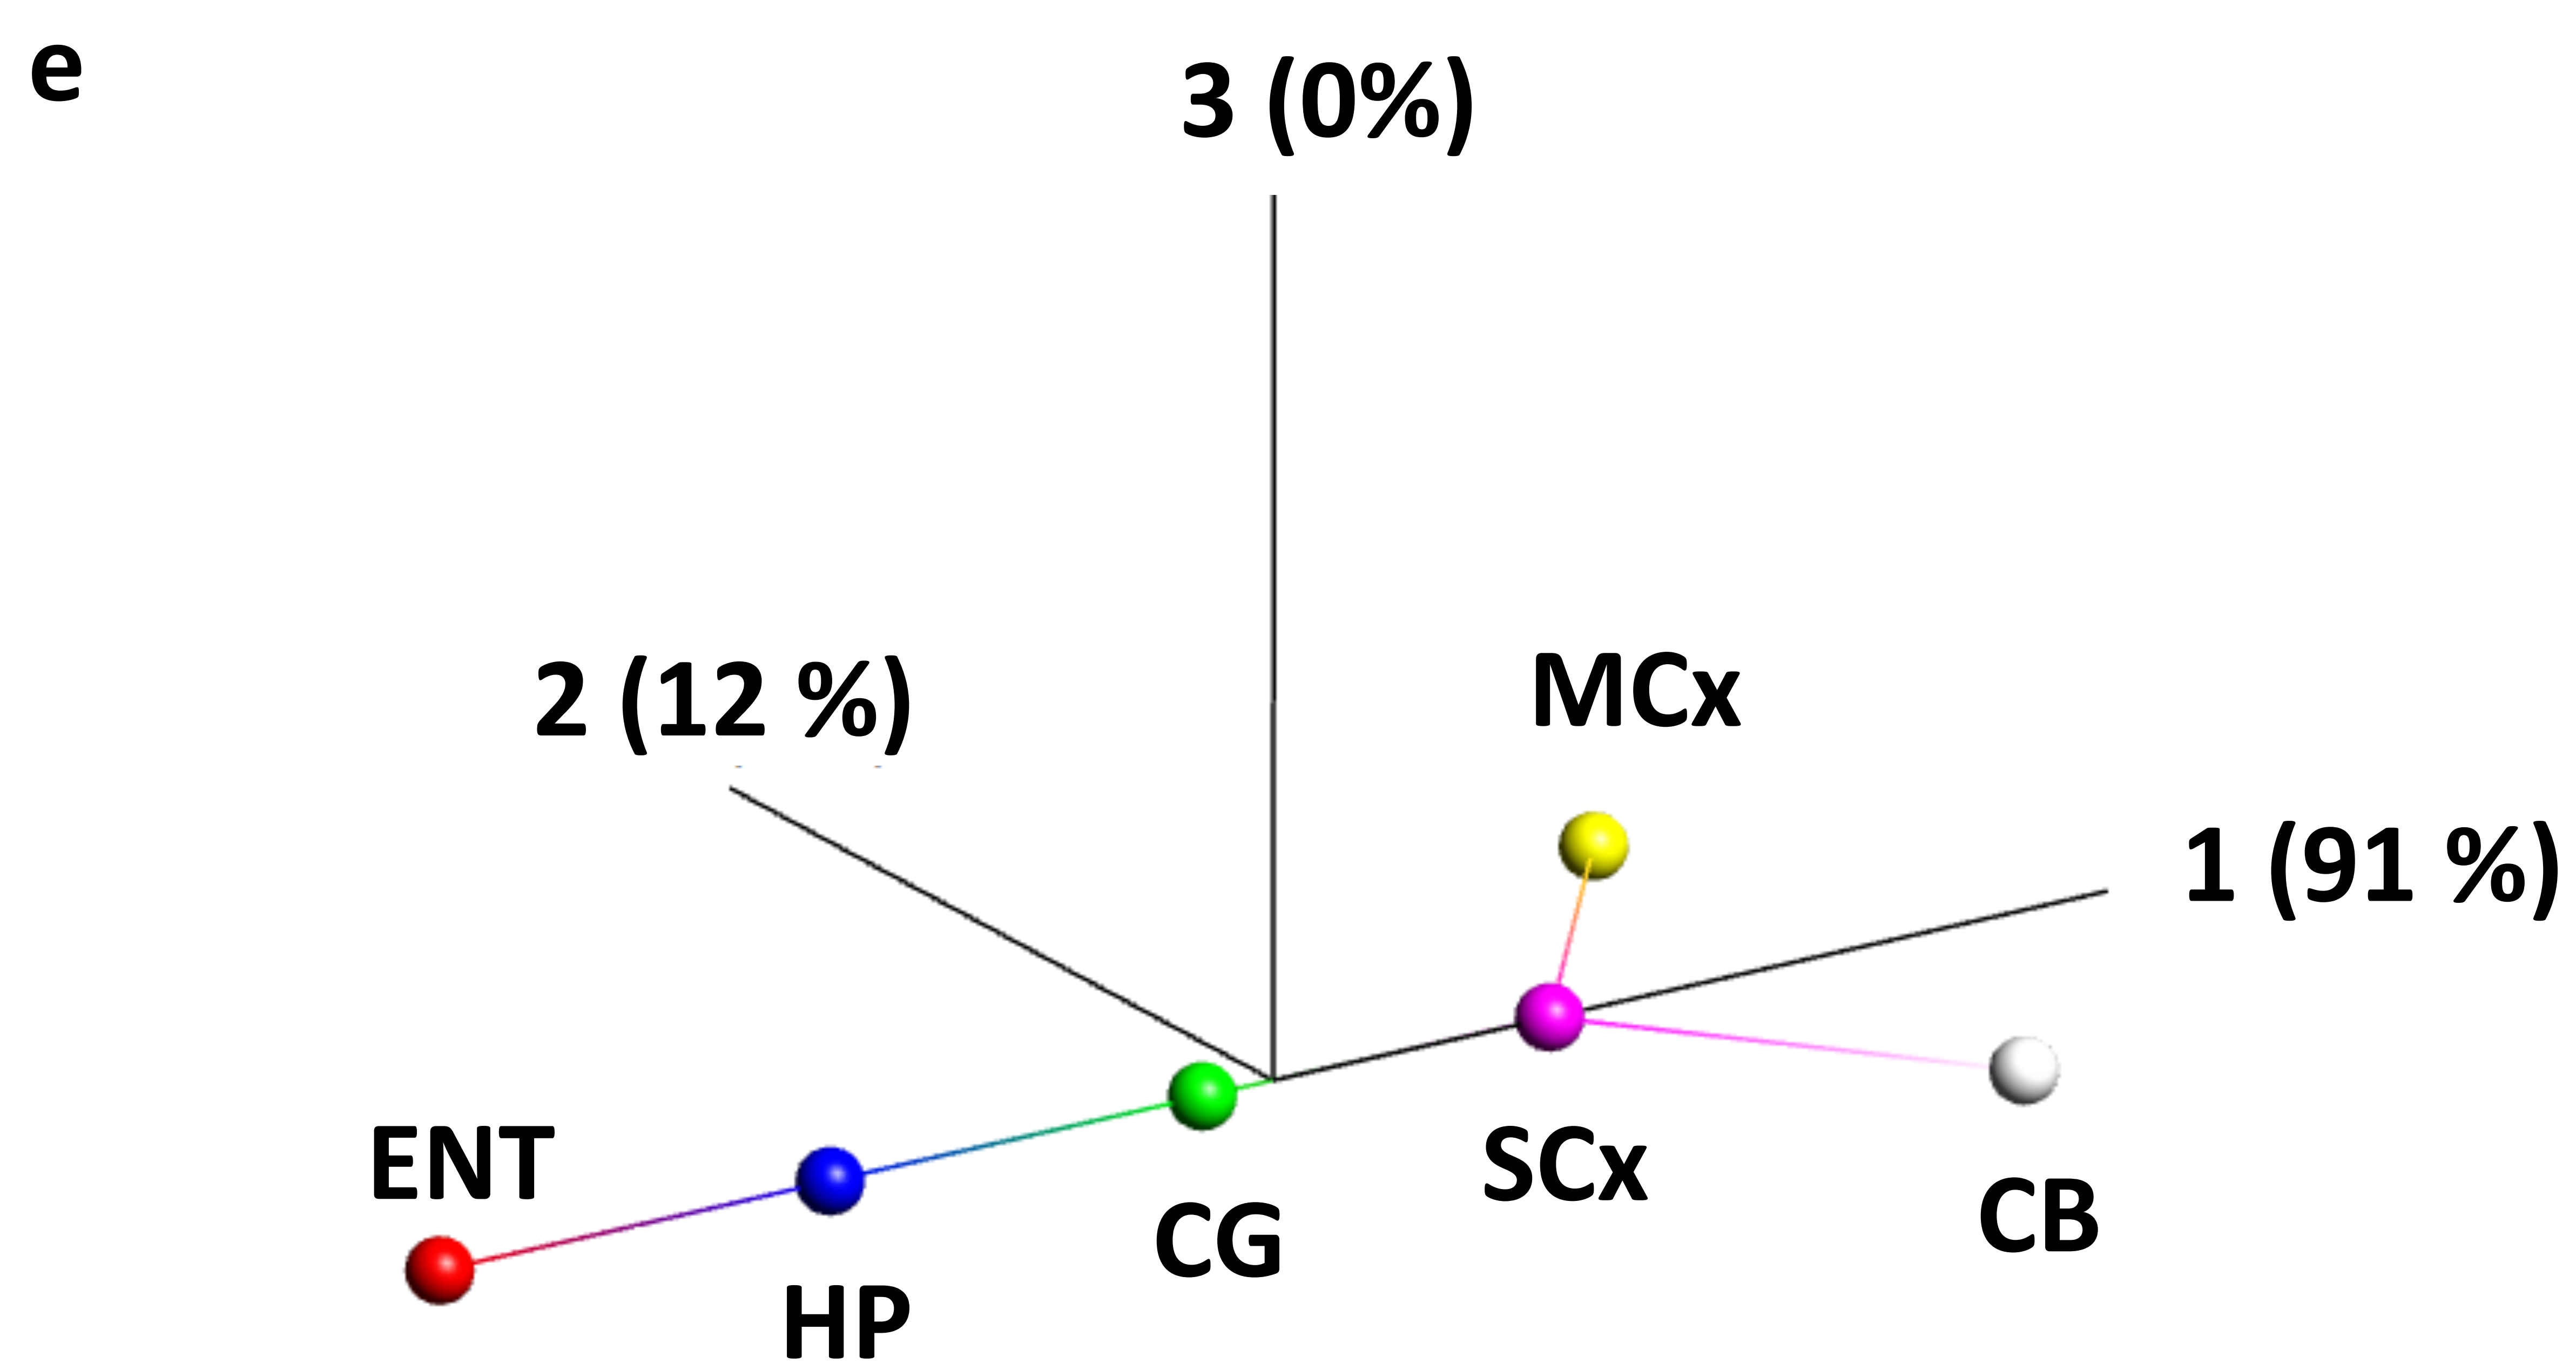



### a. Hippocampus

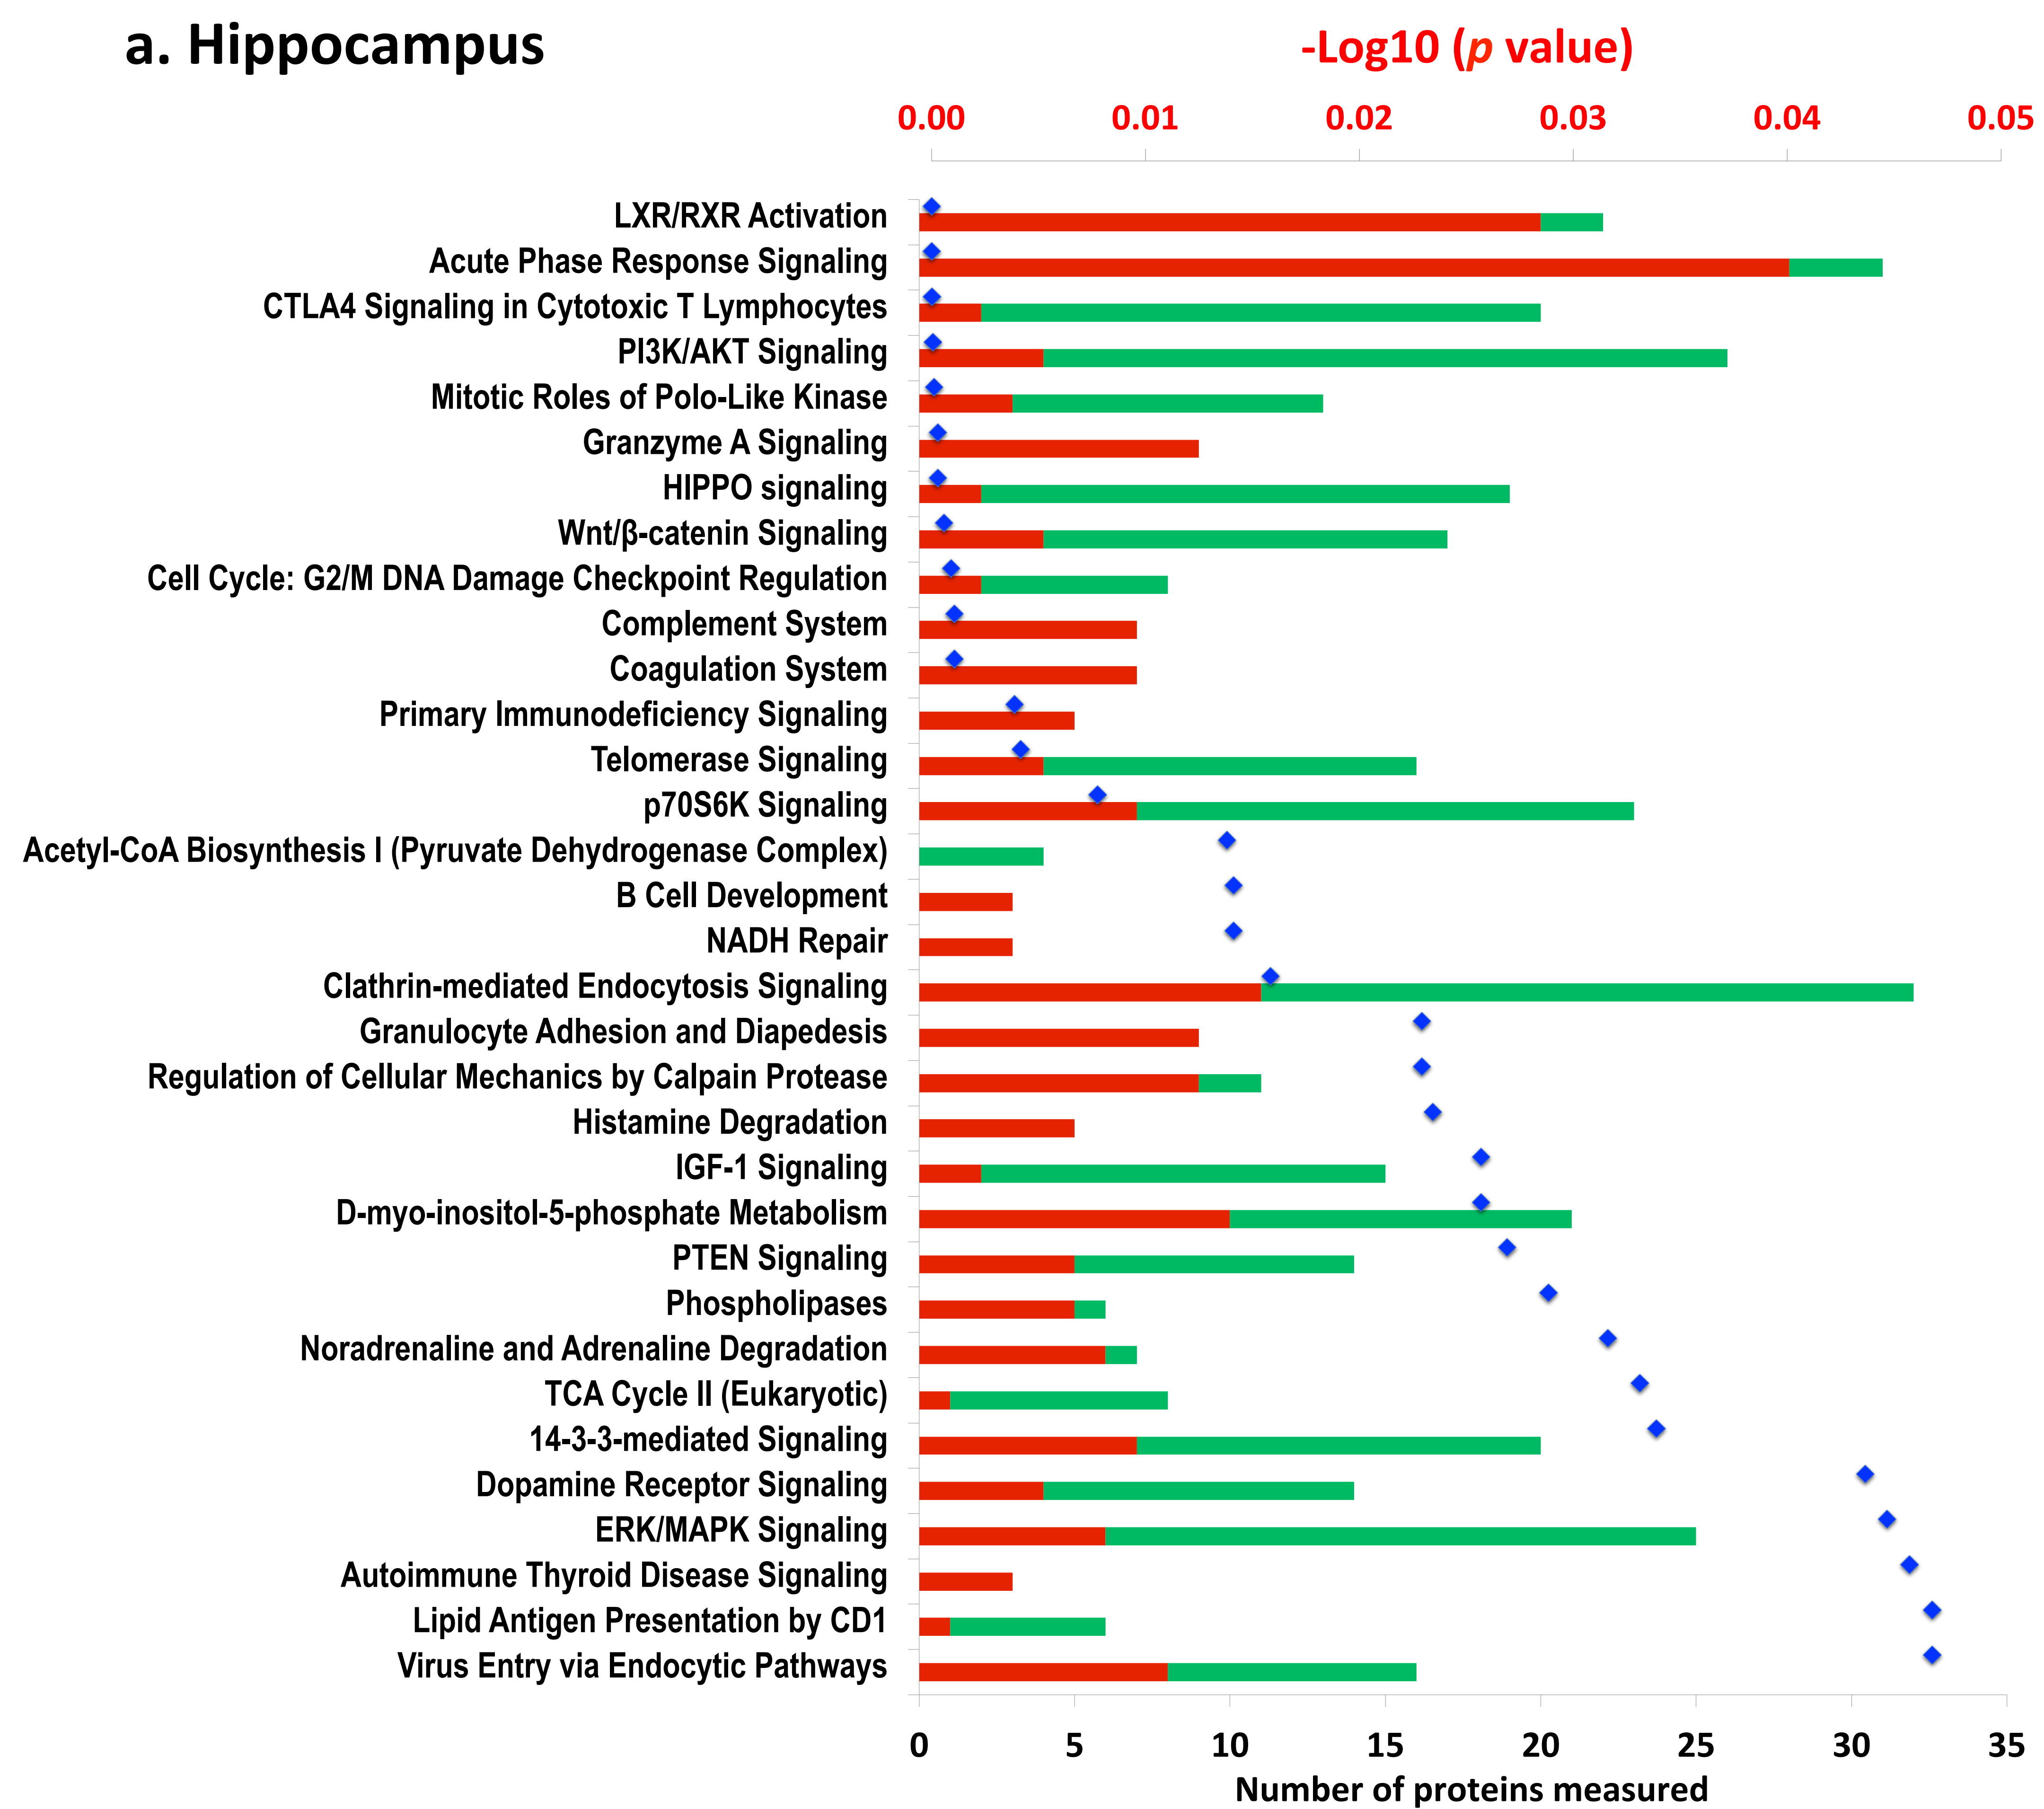

### b. Entorhinal Cortex

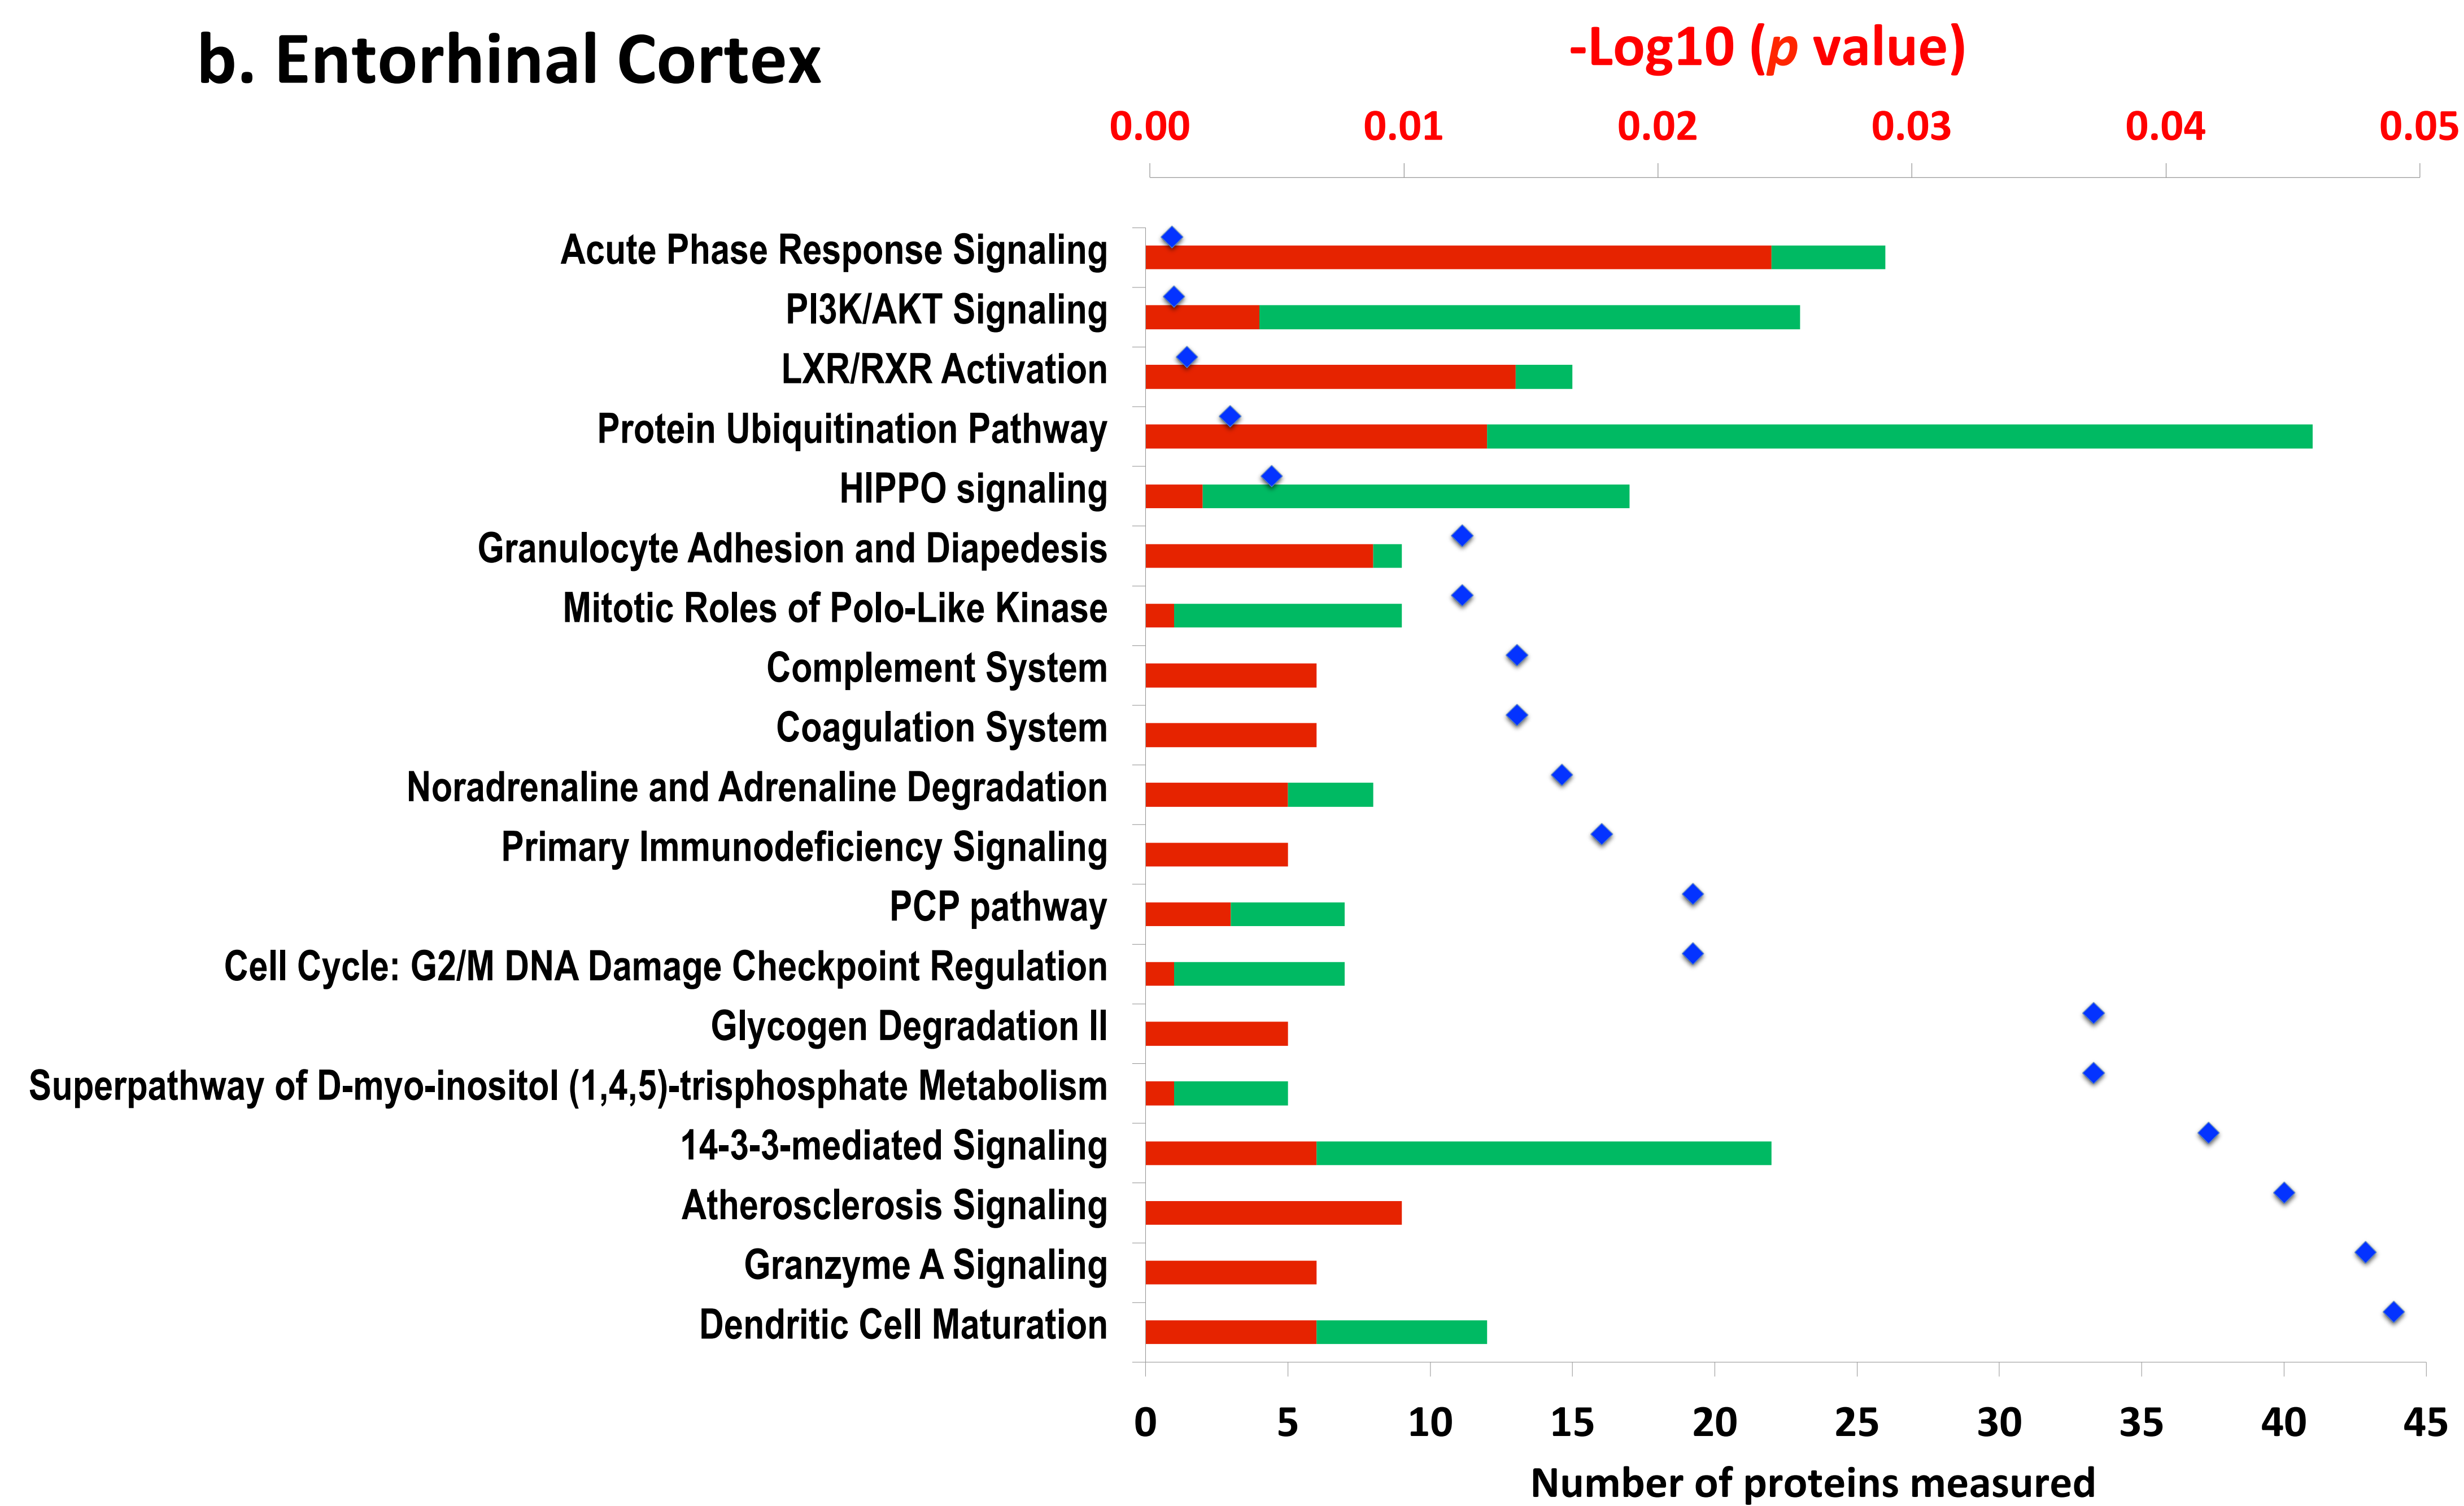

### c. Cerebellum

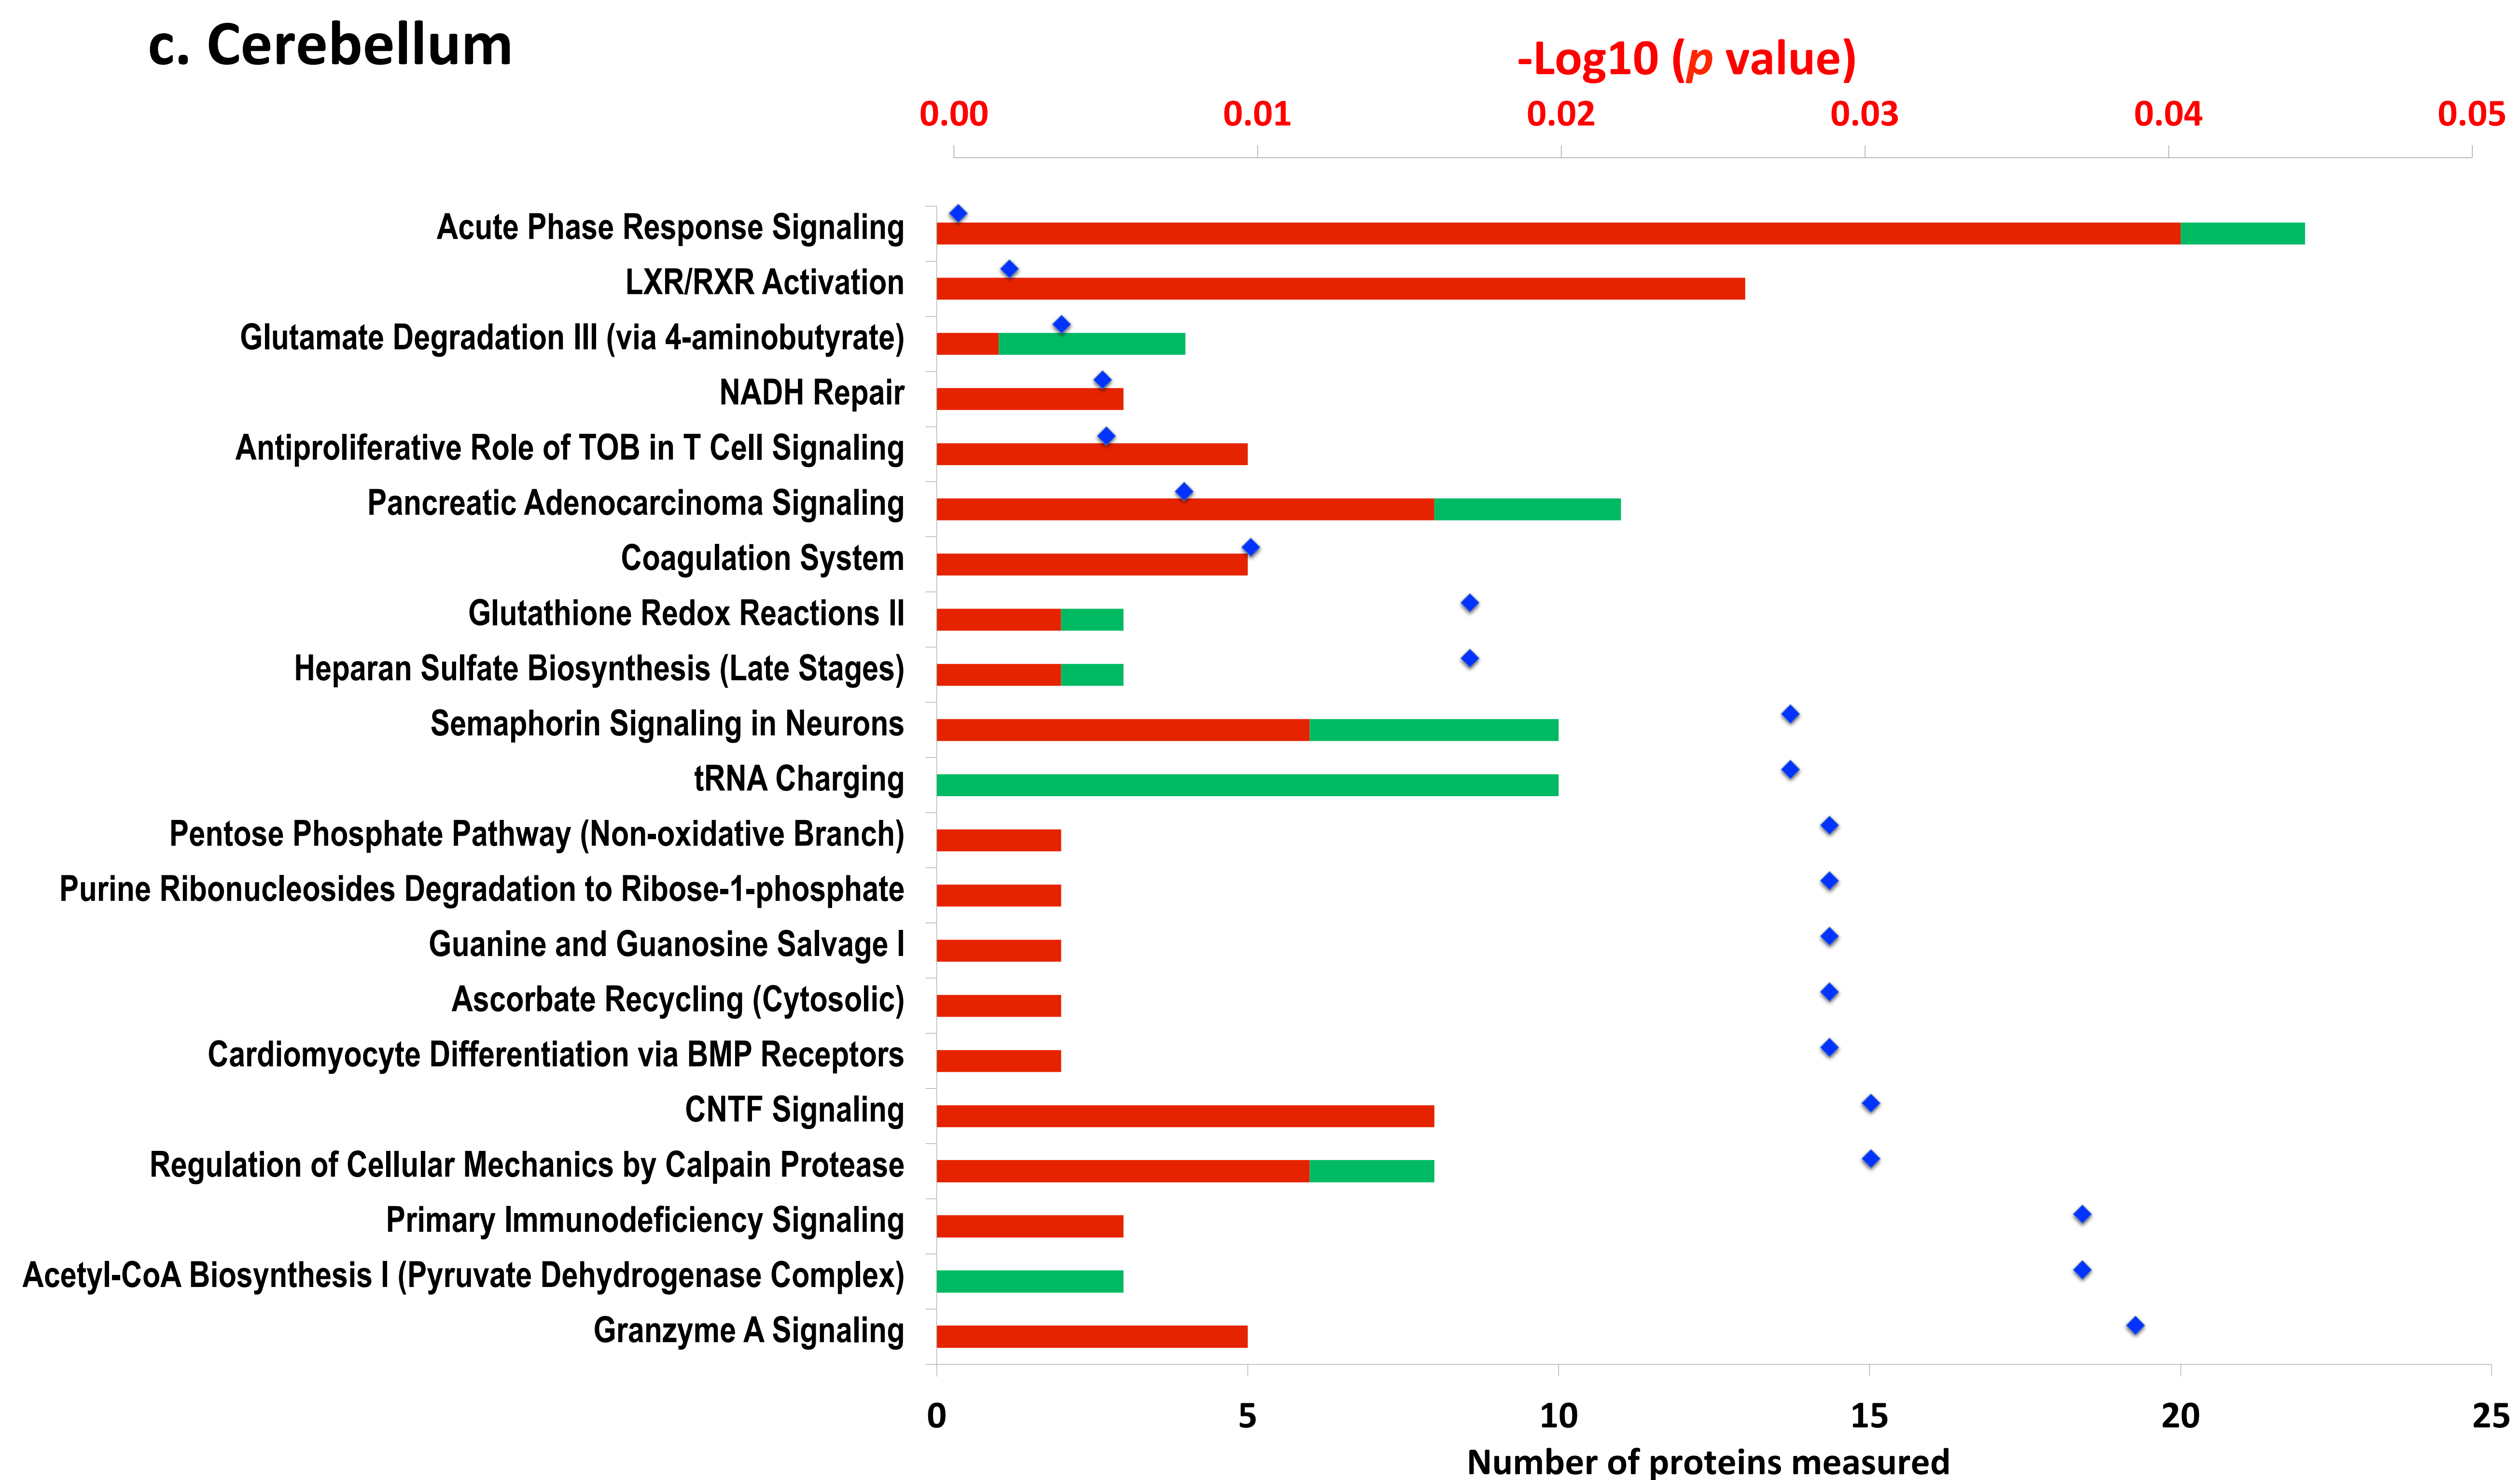

### d. Cingulate Gyrus

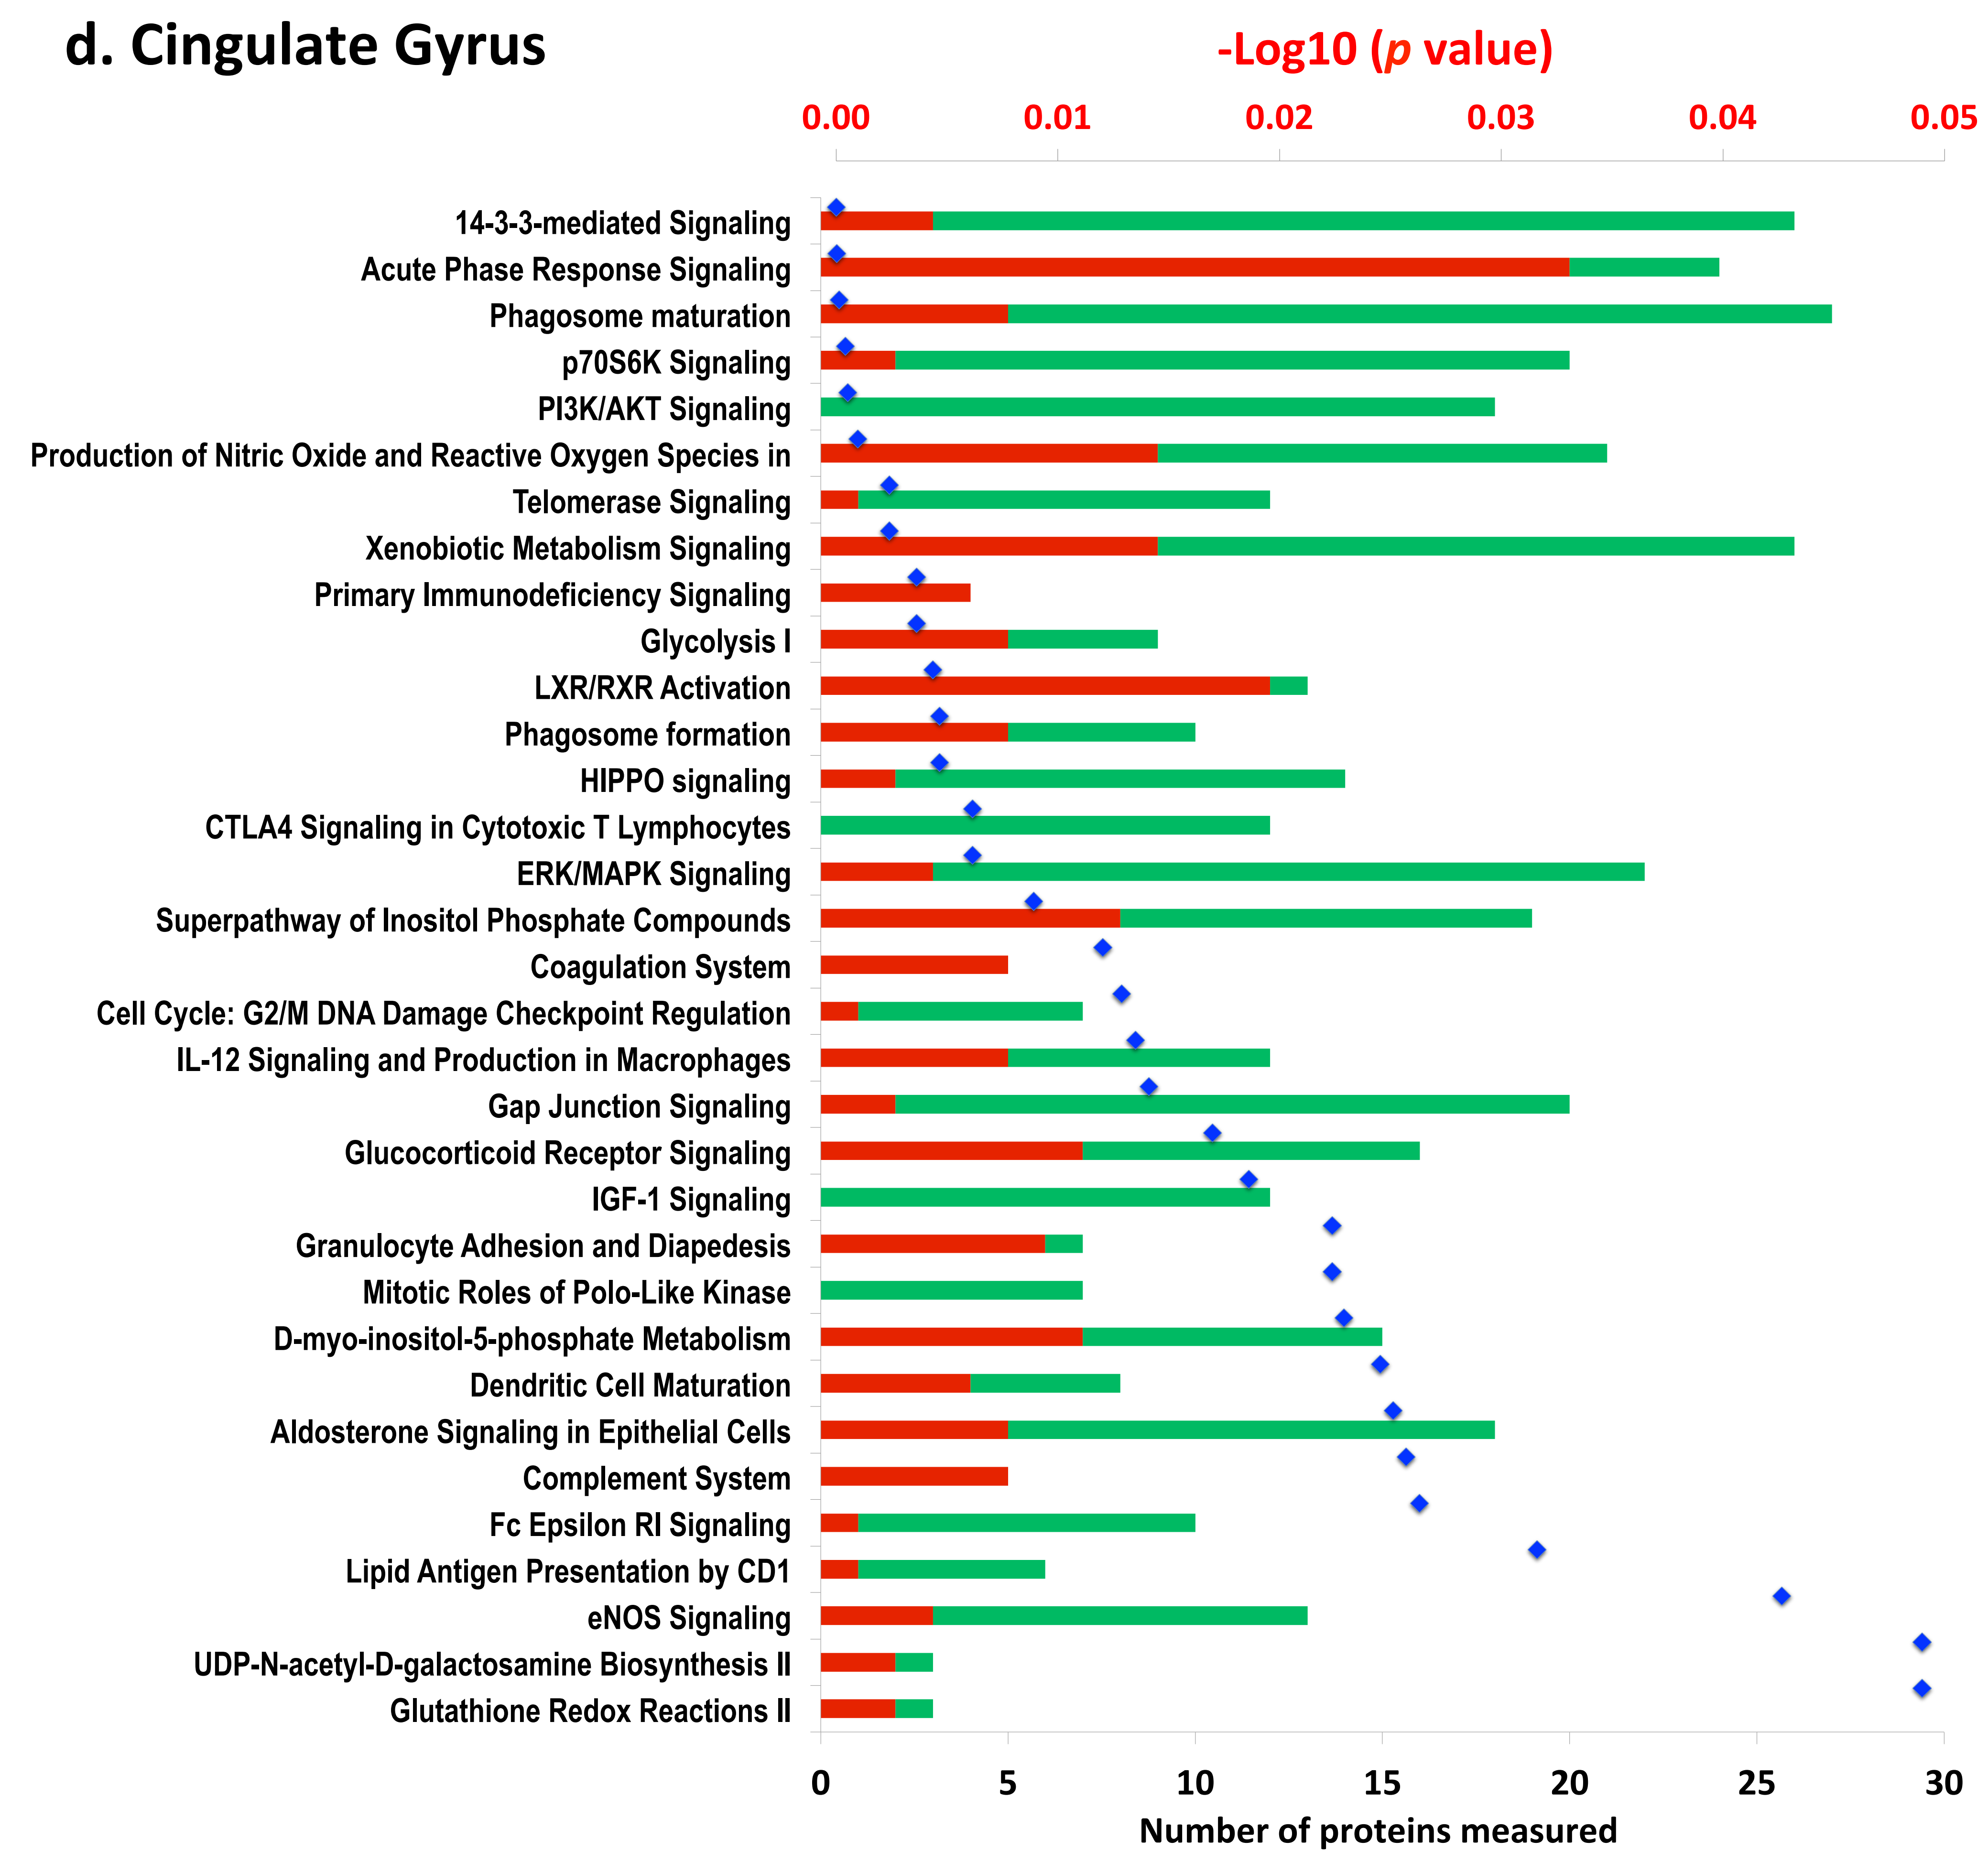

### e. Motor Cortex

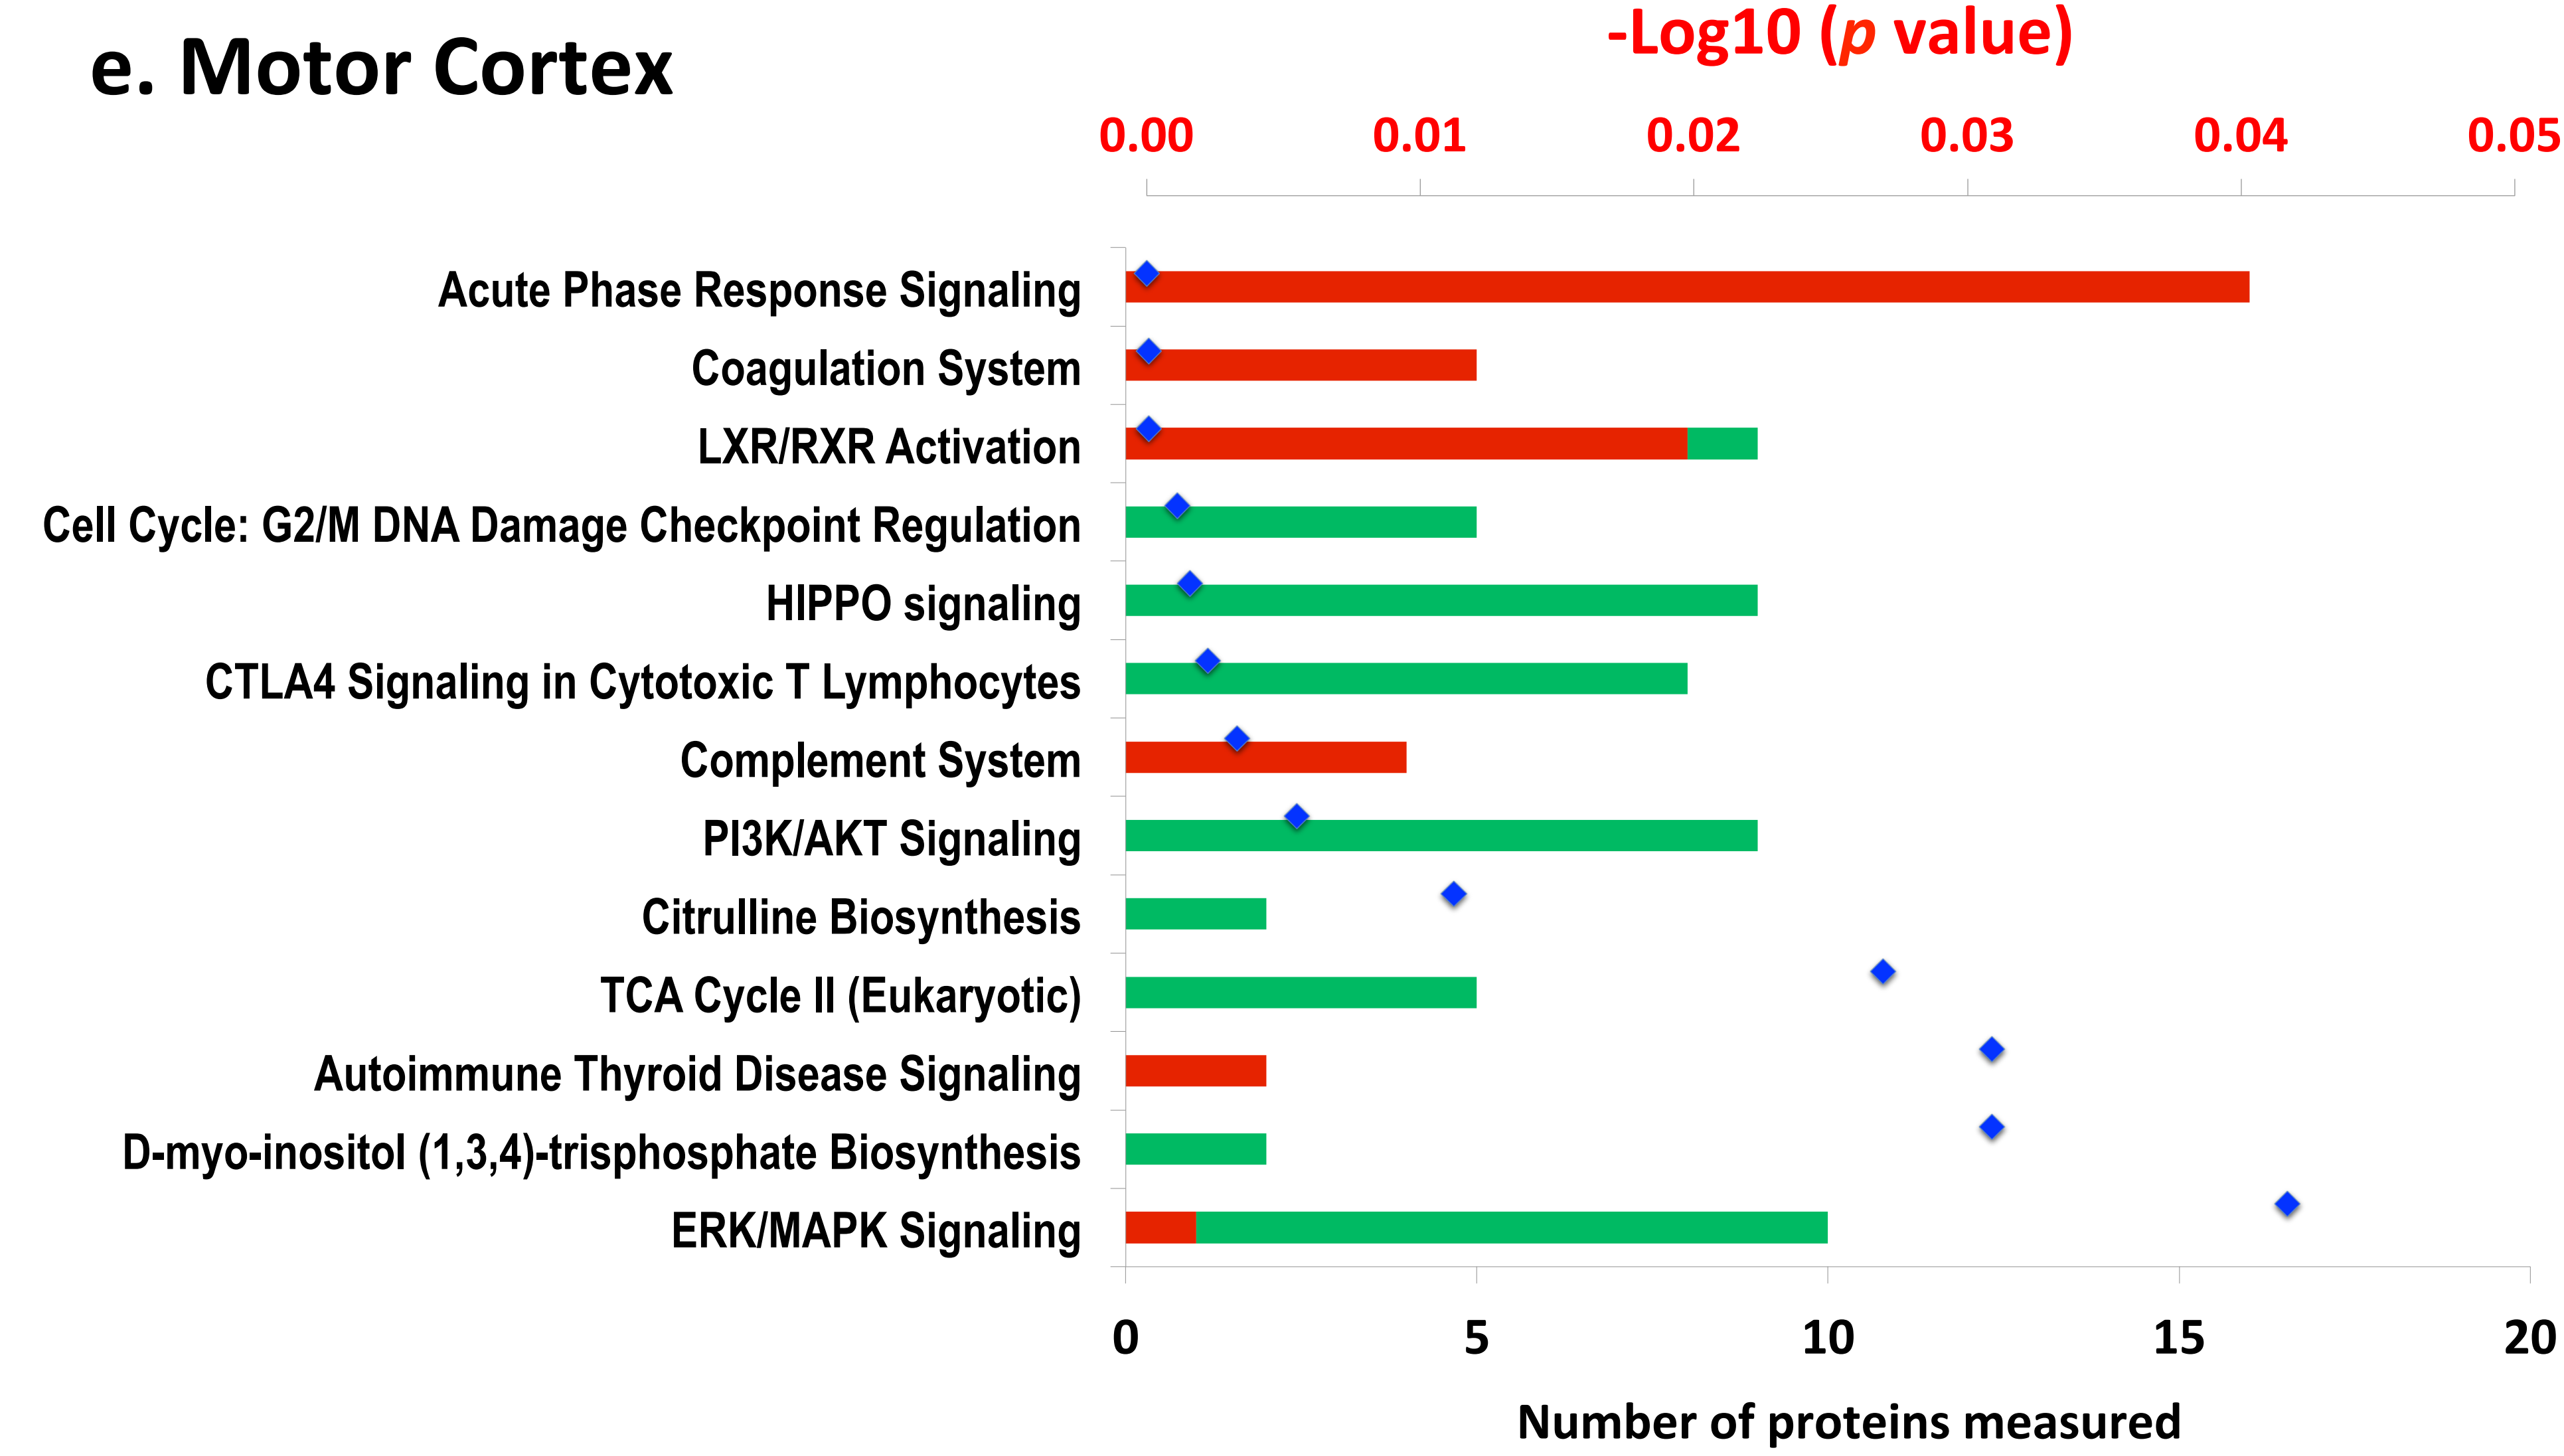

### f. Sensory Cortex

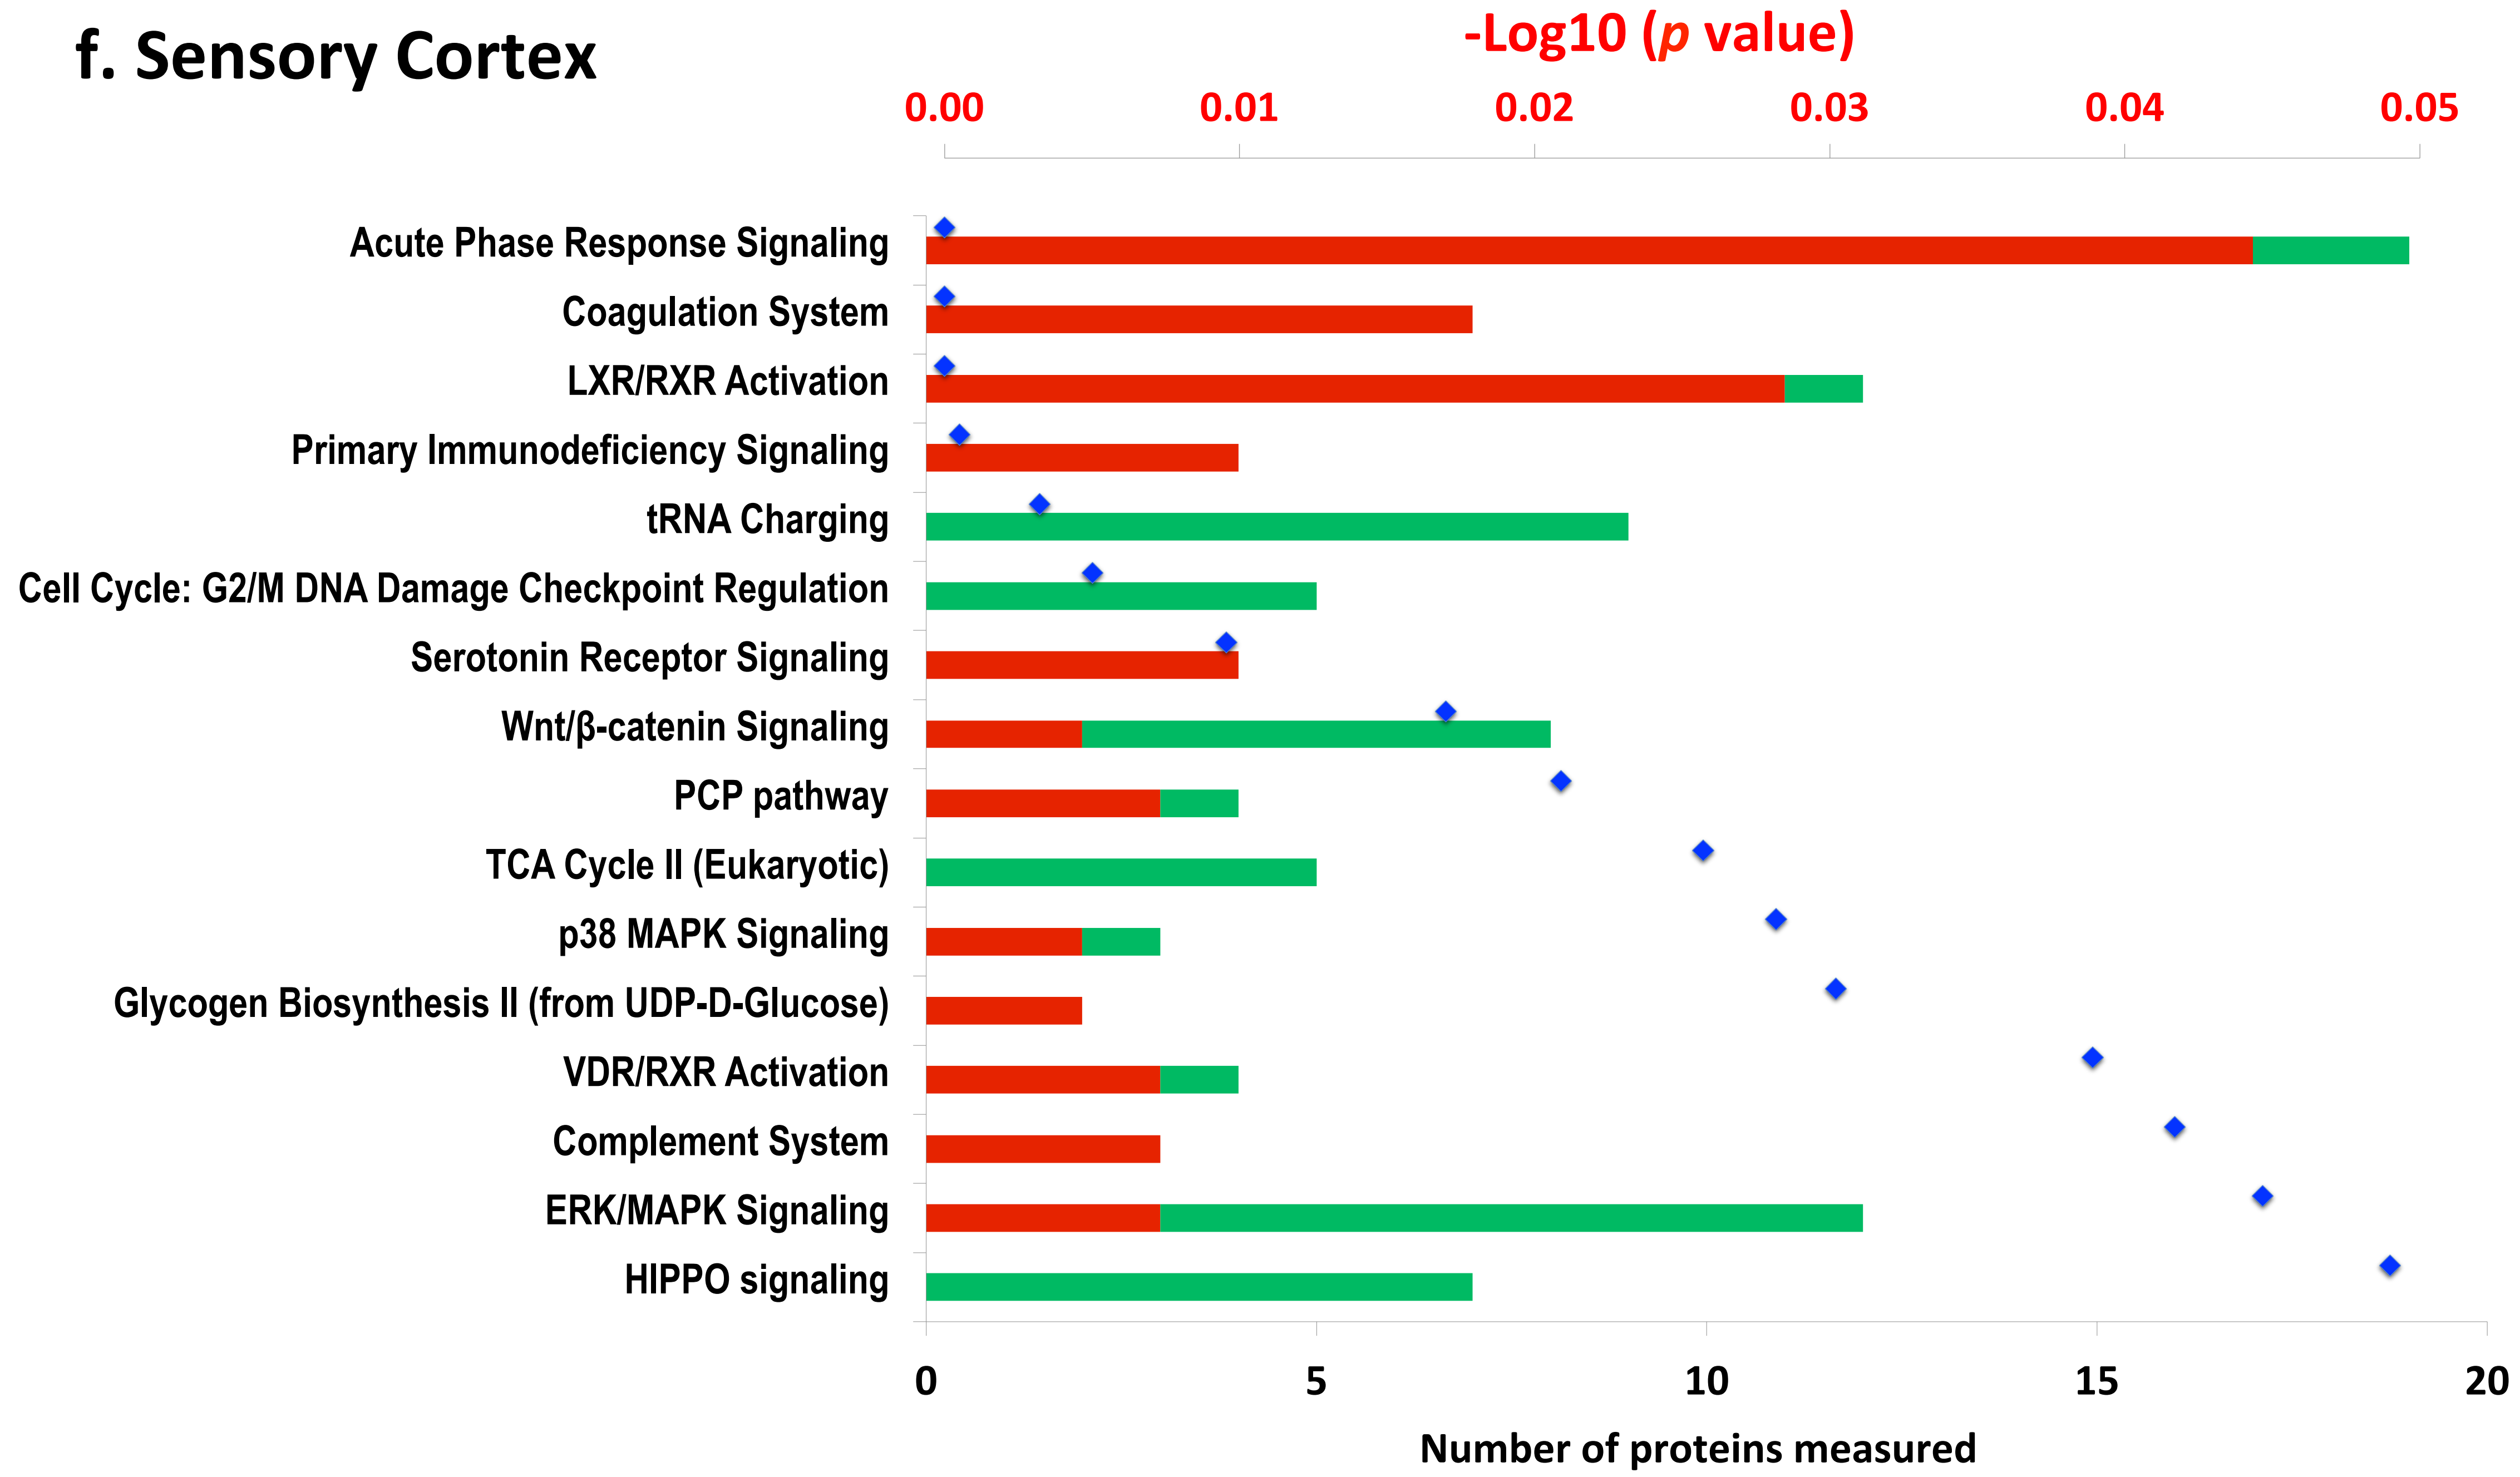

■ Increased  
■ Decreased  
◆ Log(p value)



### a. Developmental process

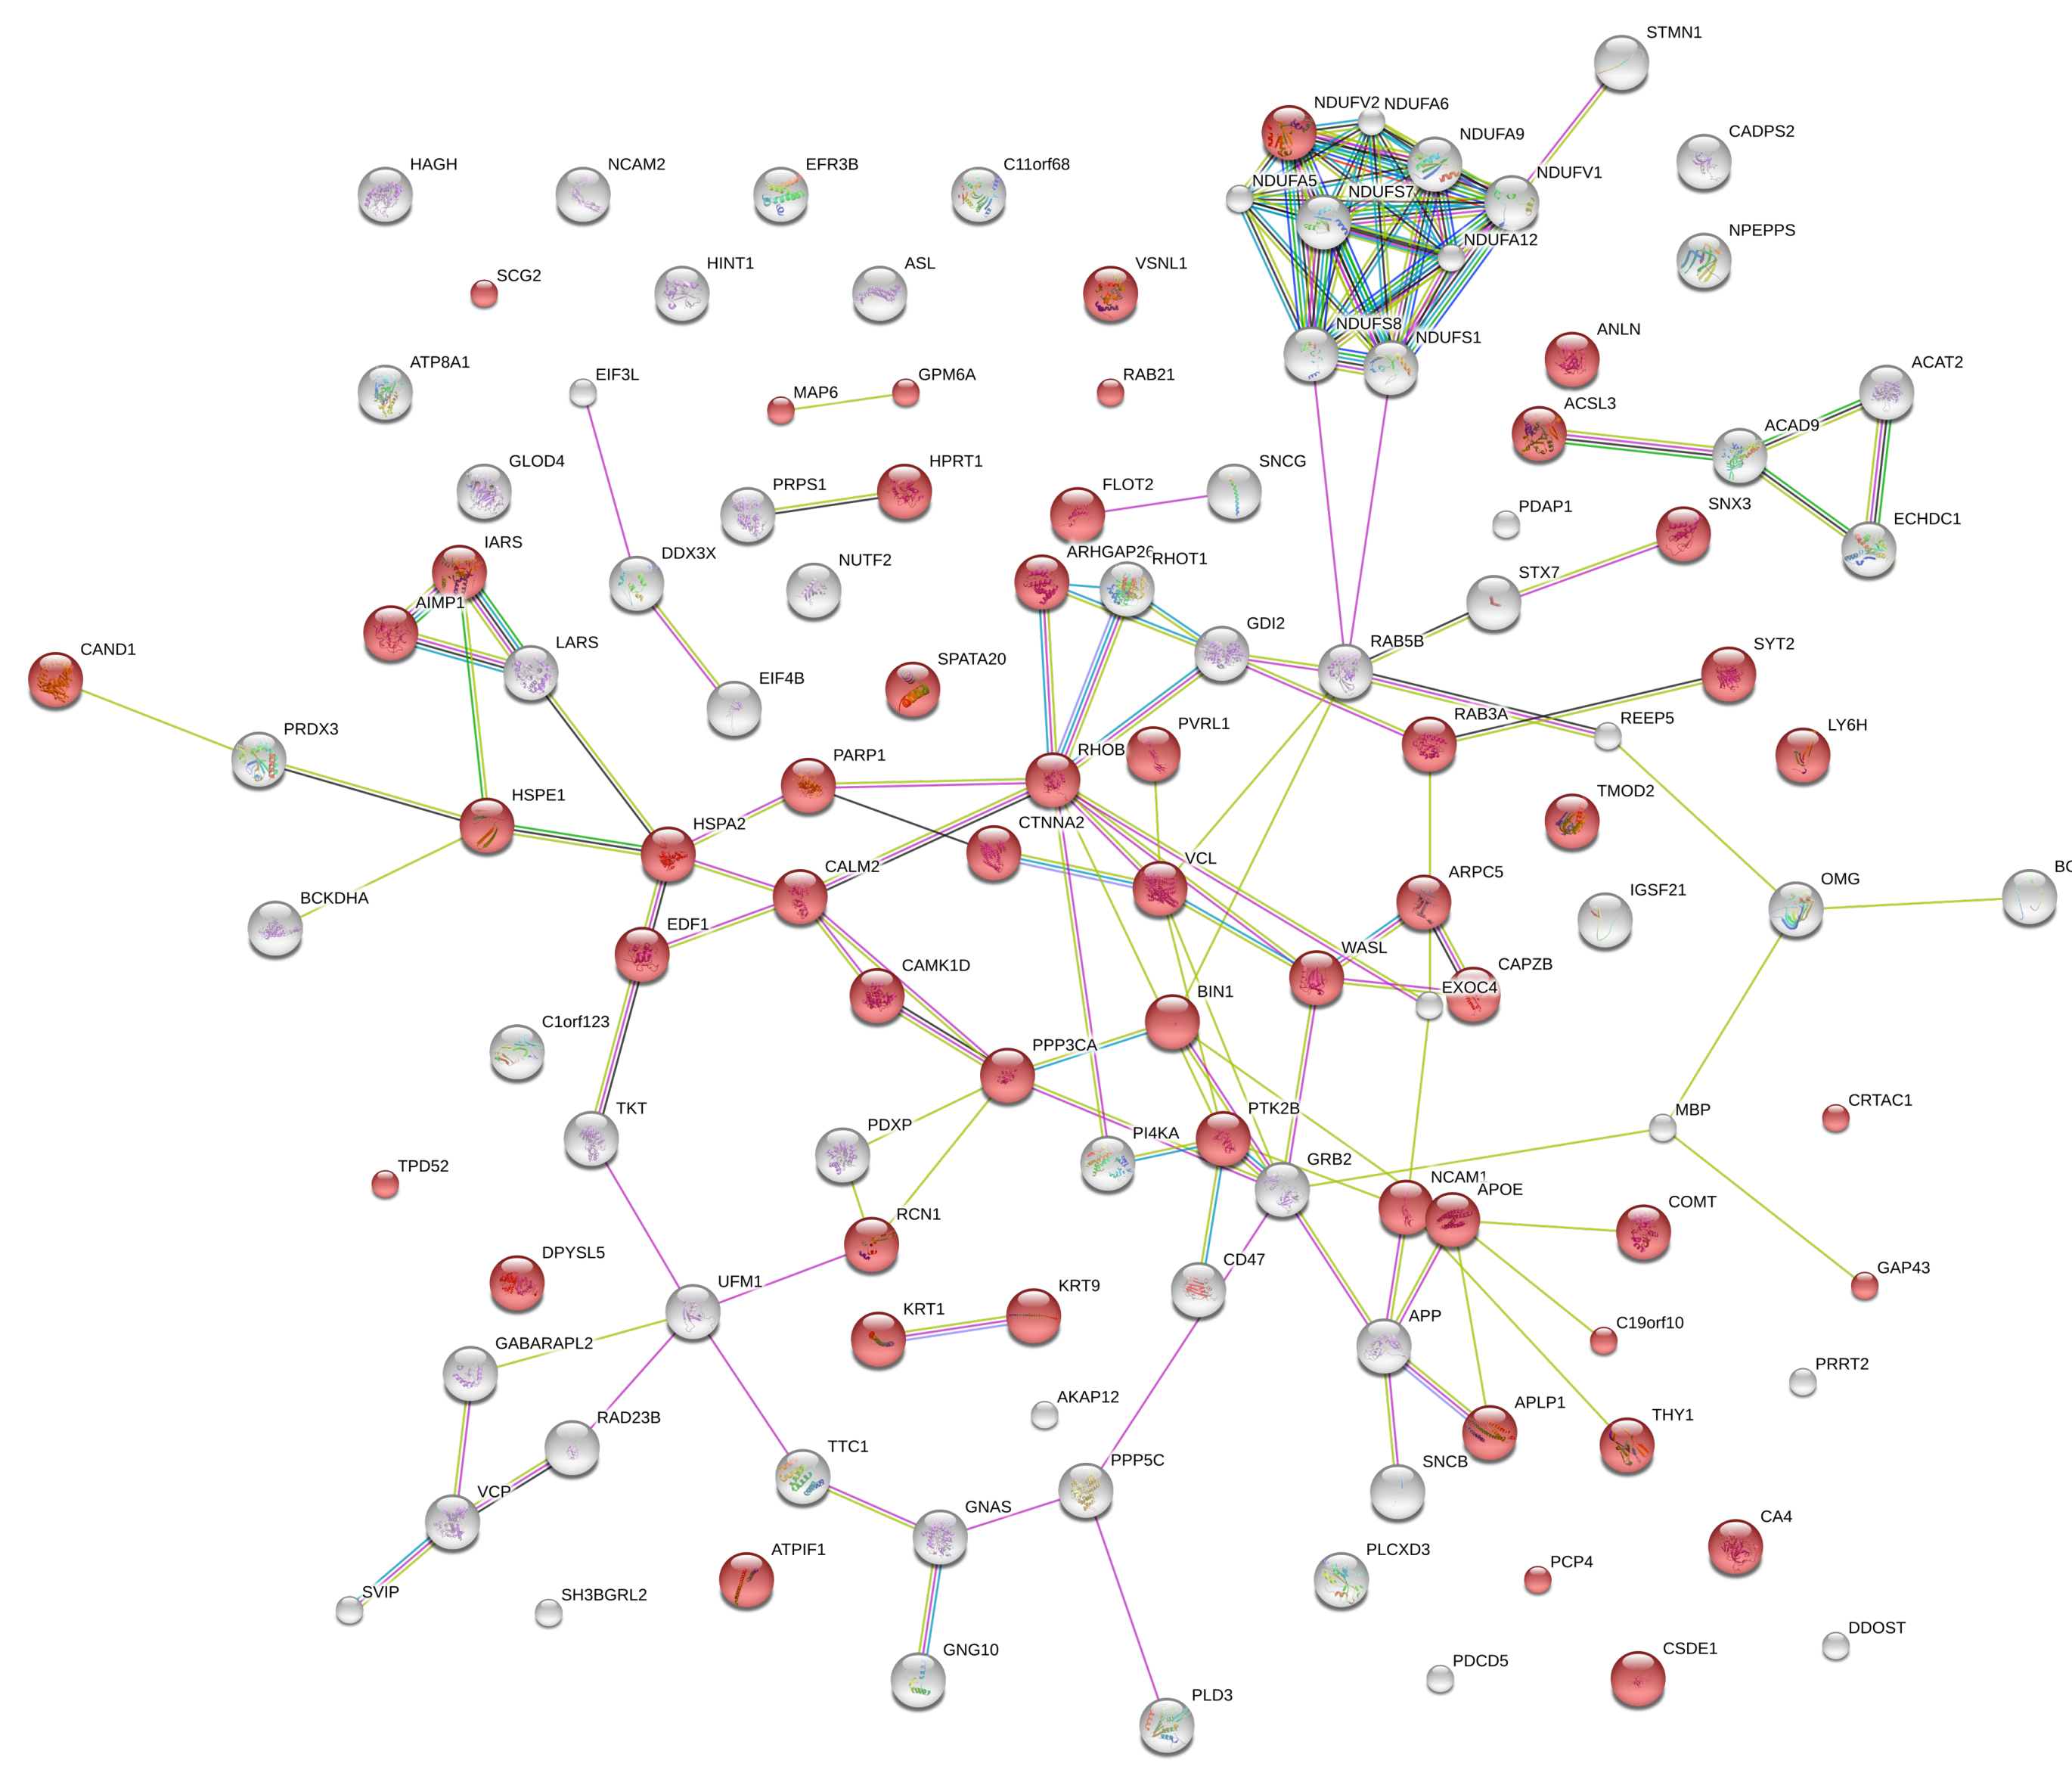

### b. Nervous system development

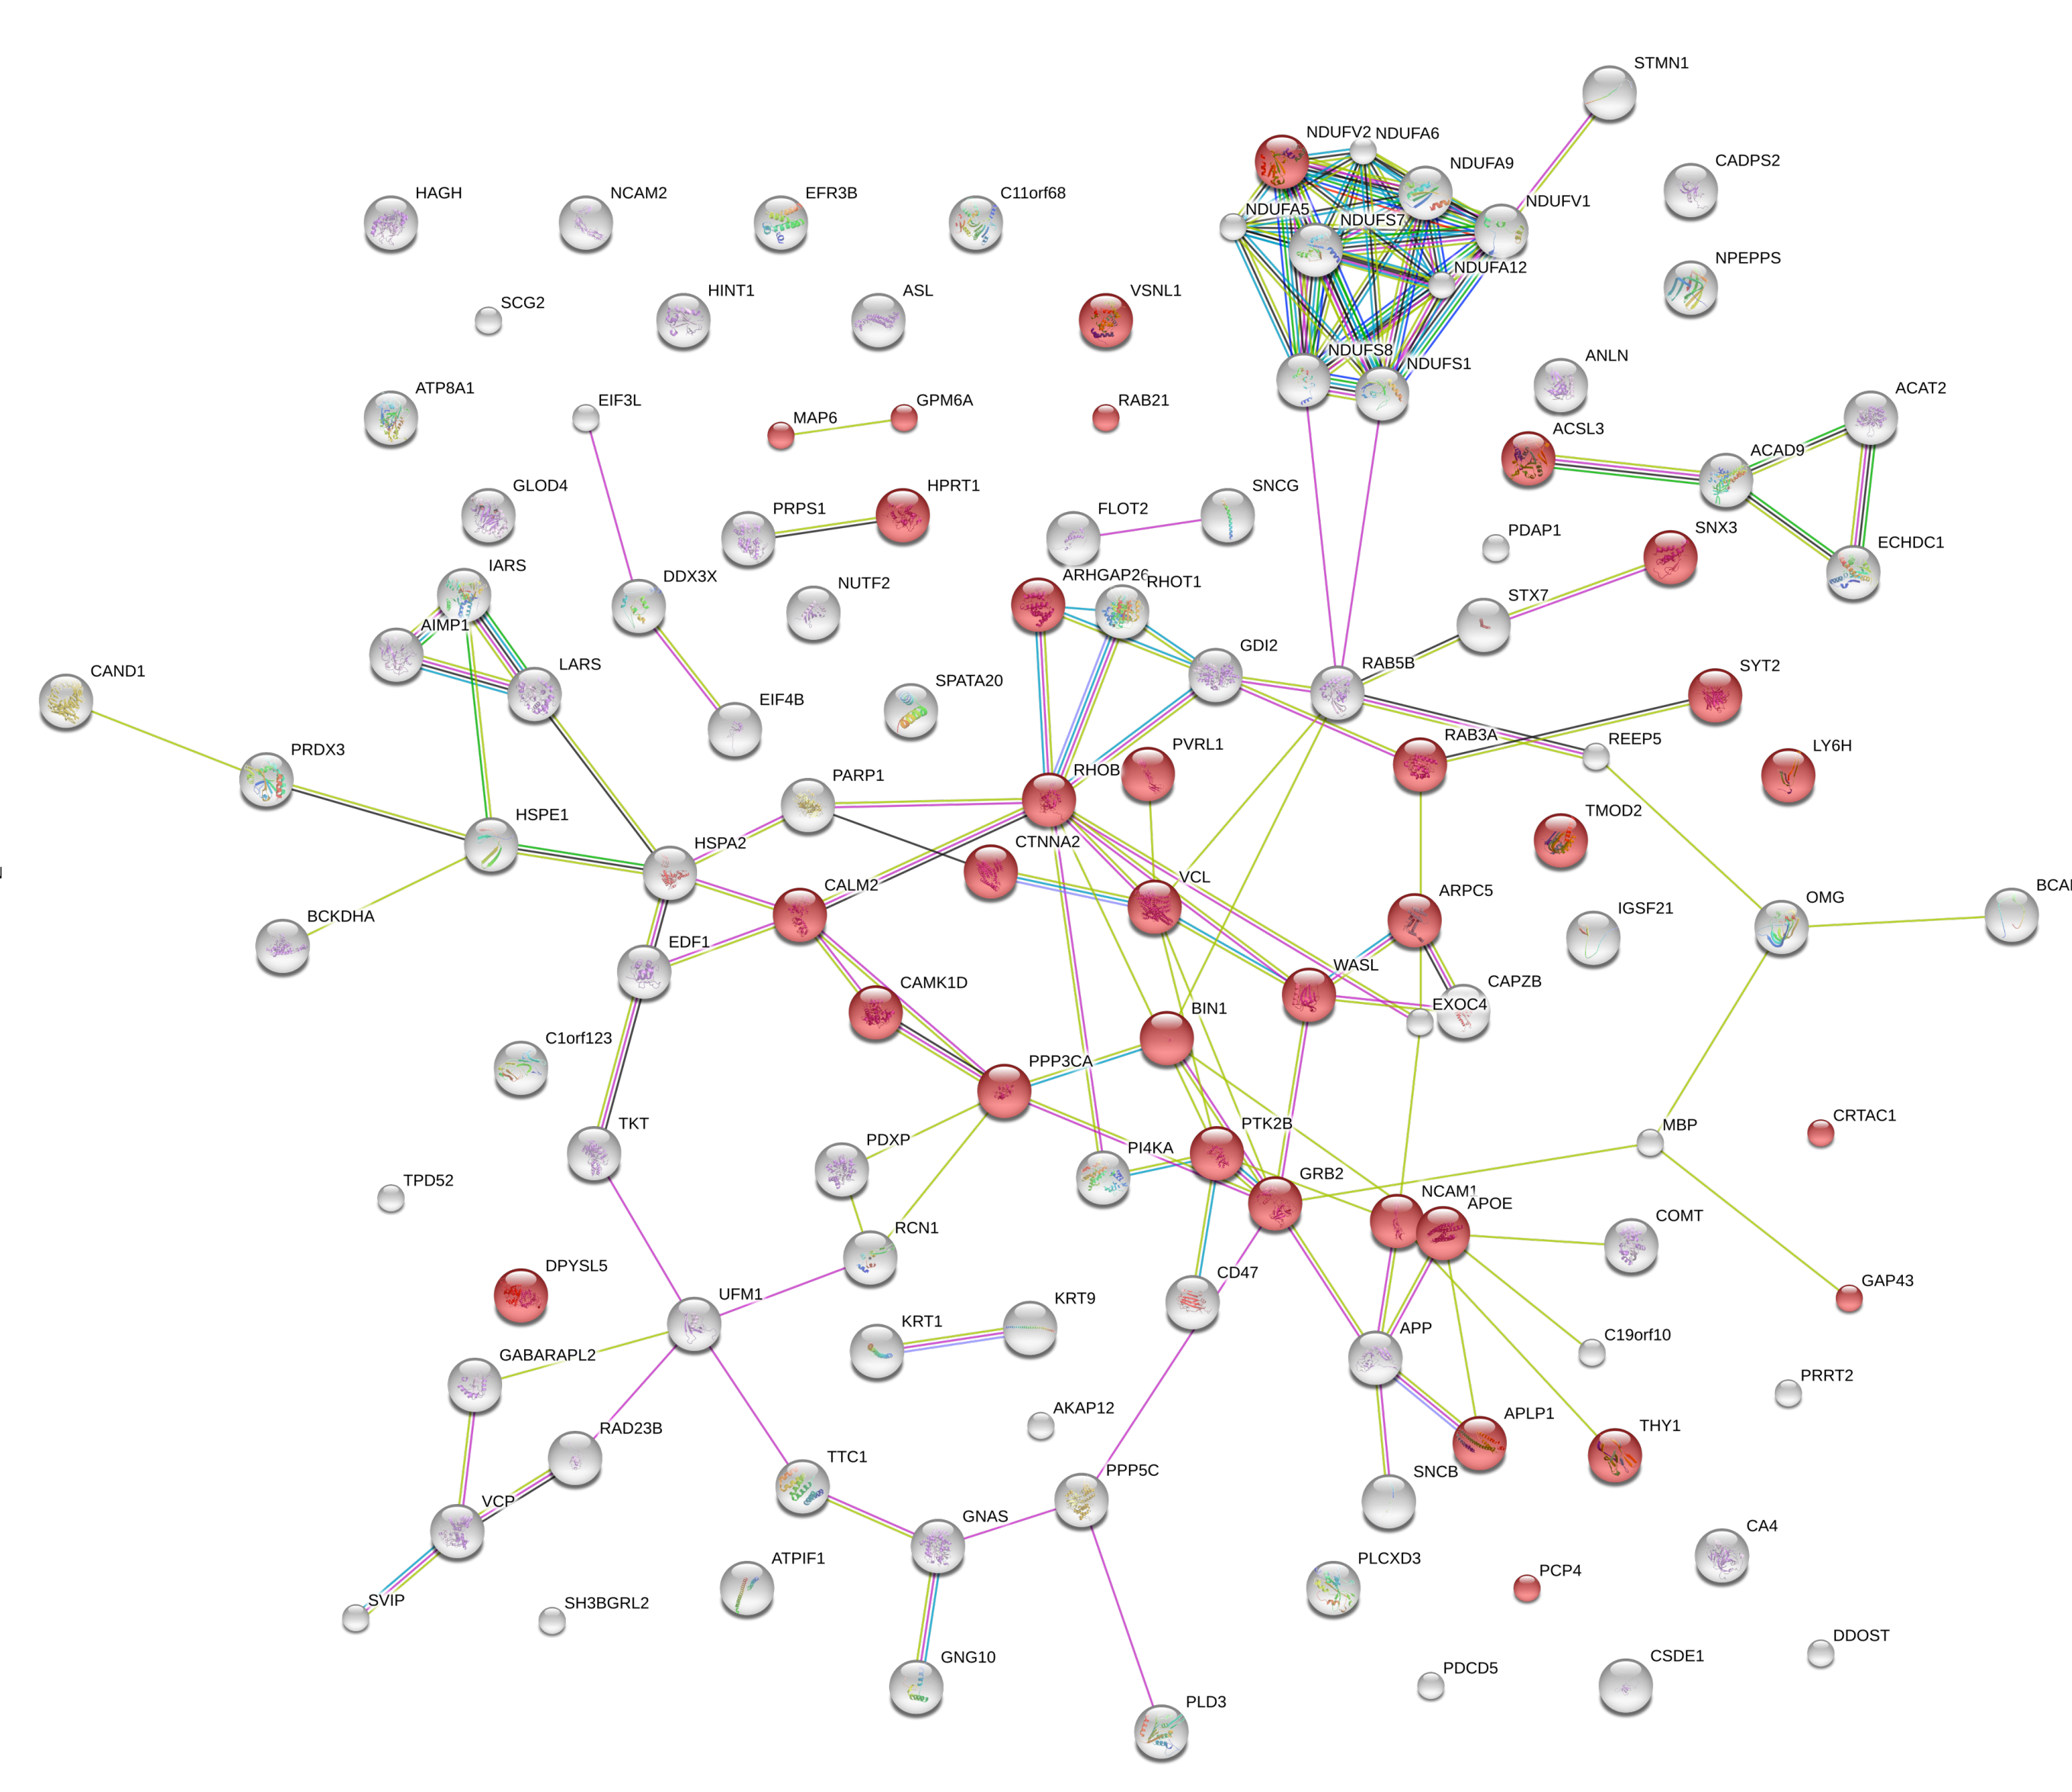

### c. Neuron projection development

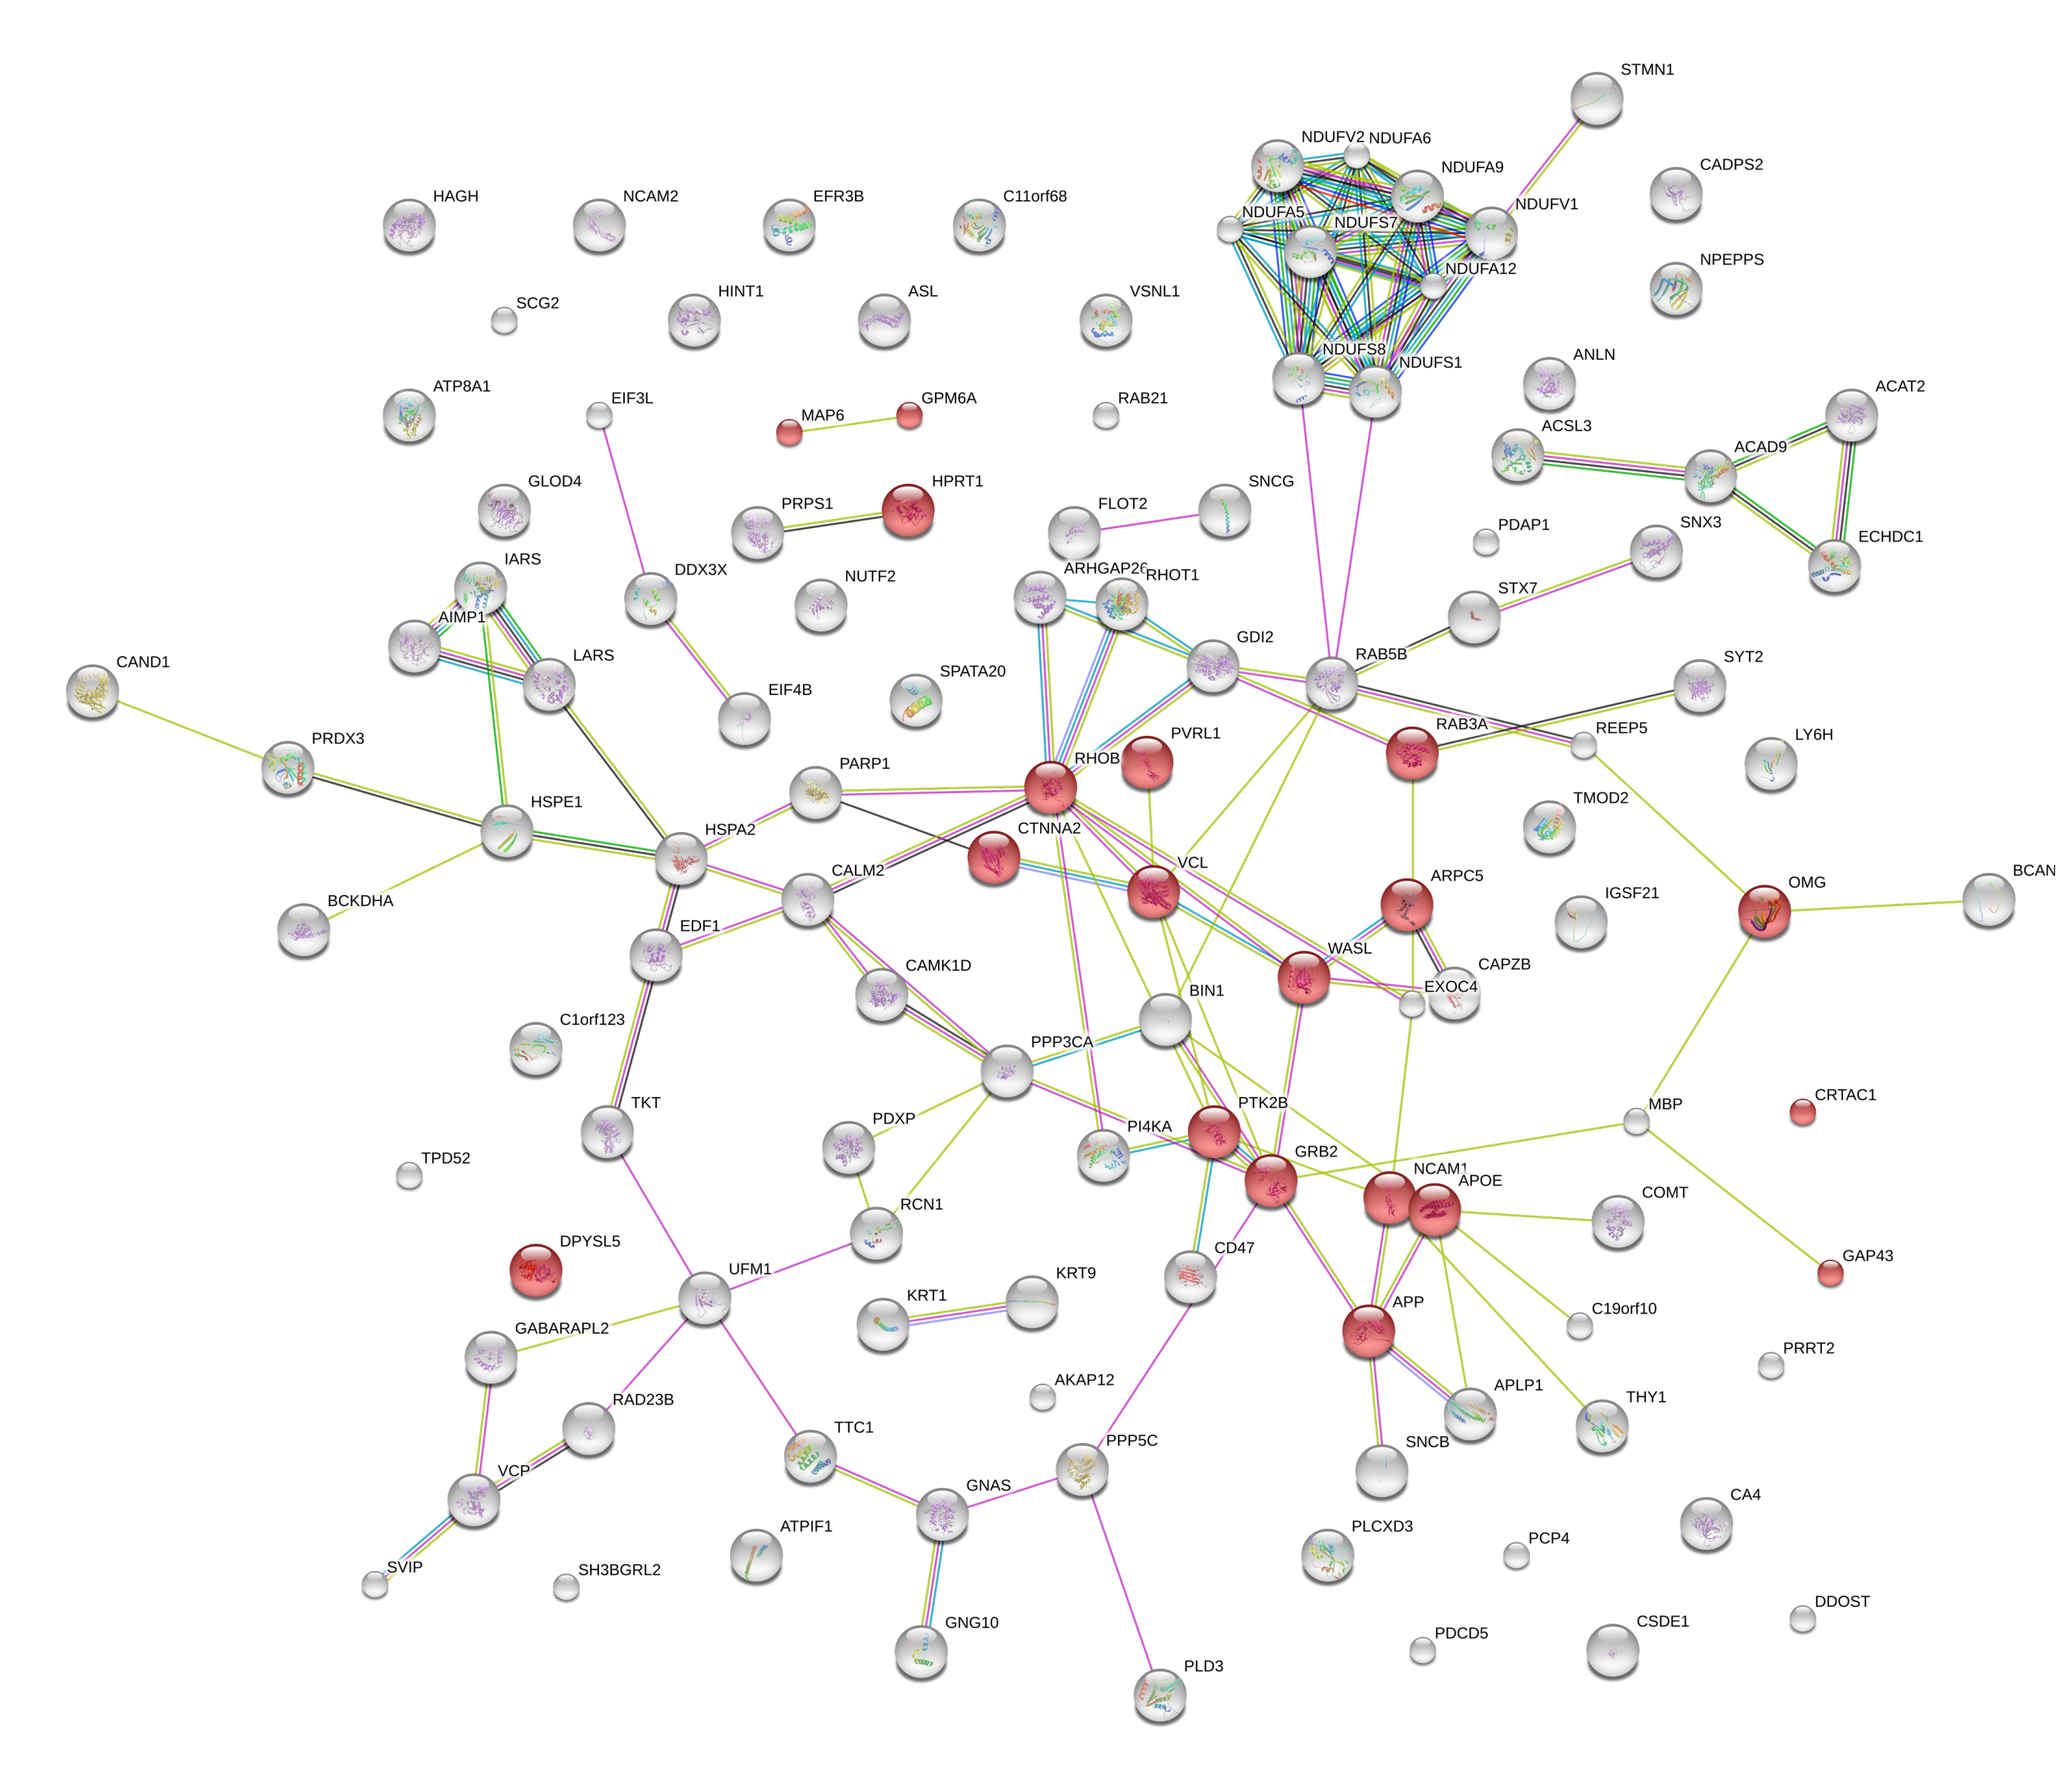

### d. Mitochondrial electron transport, NADH to ubiquinone

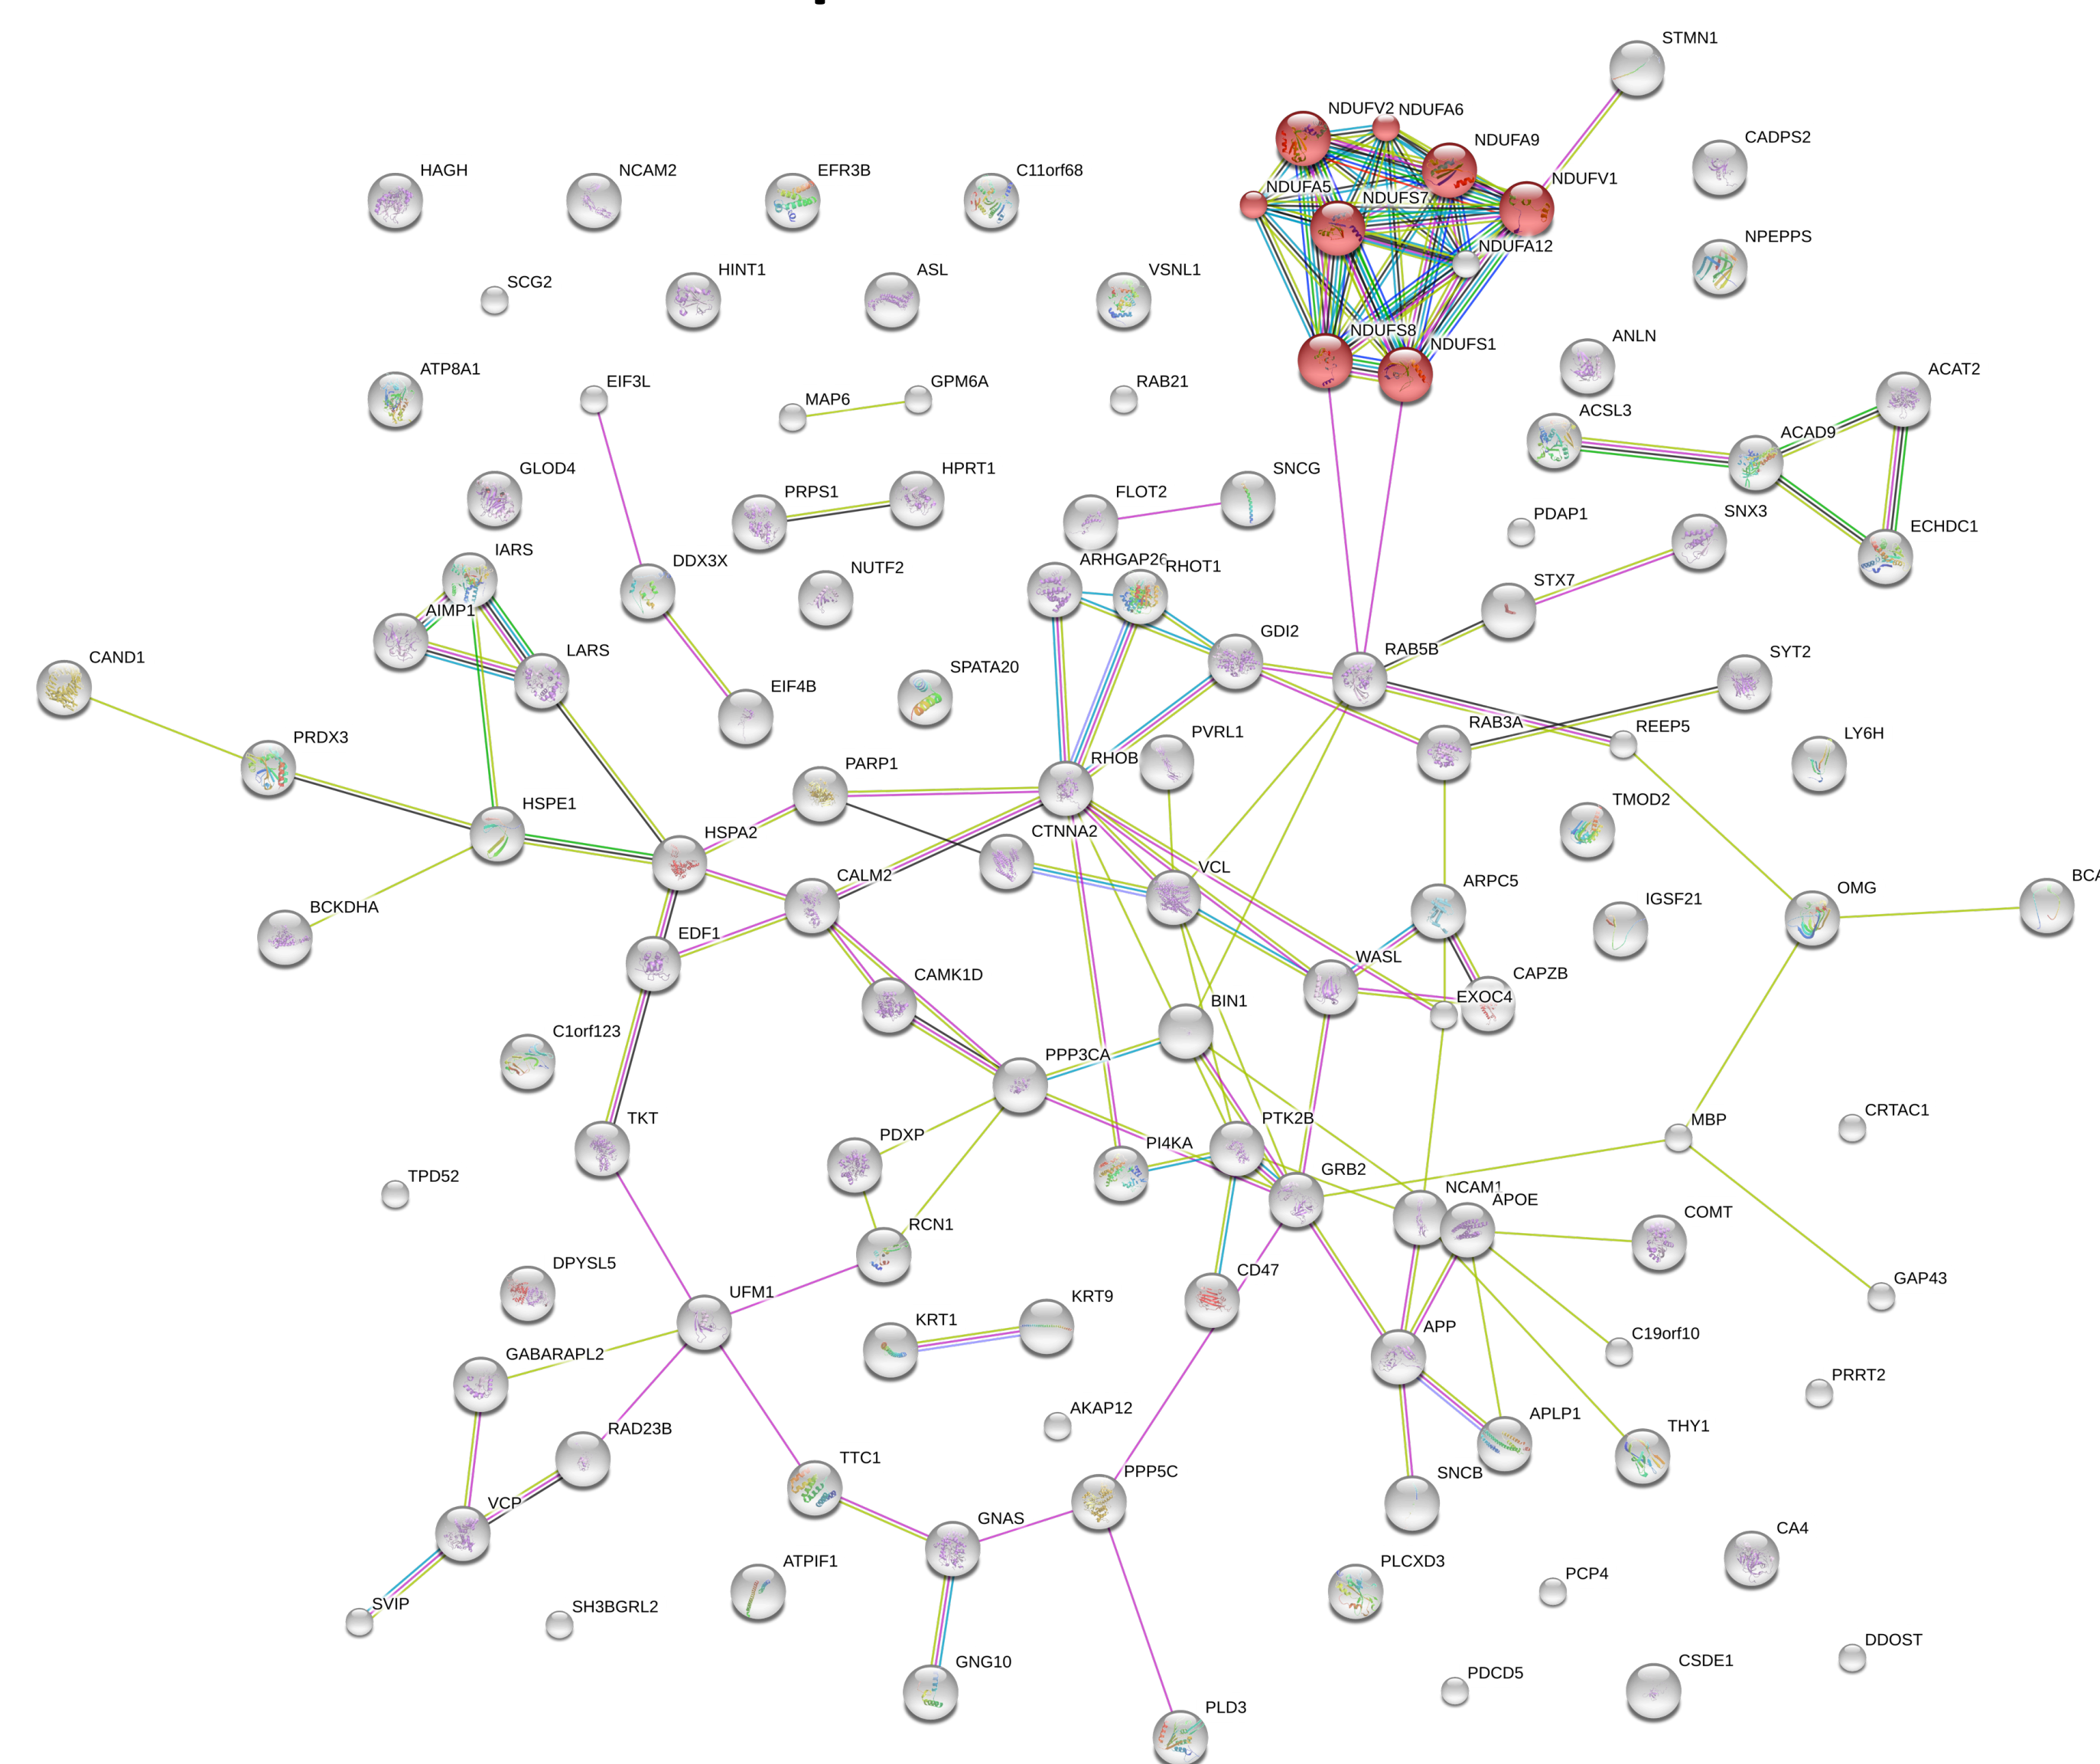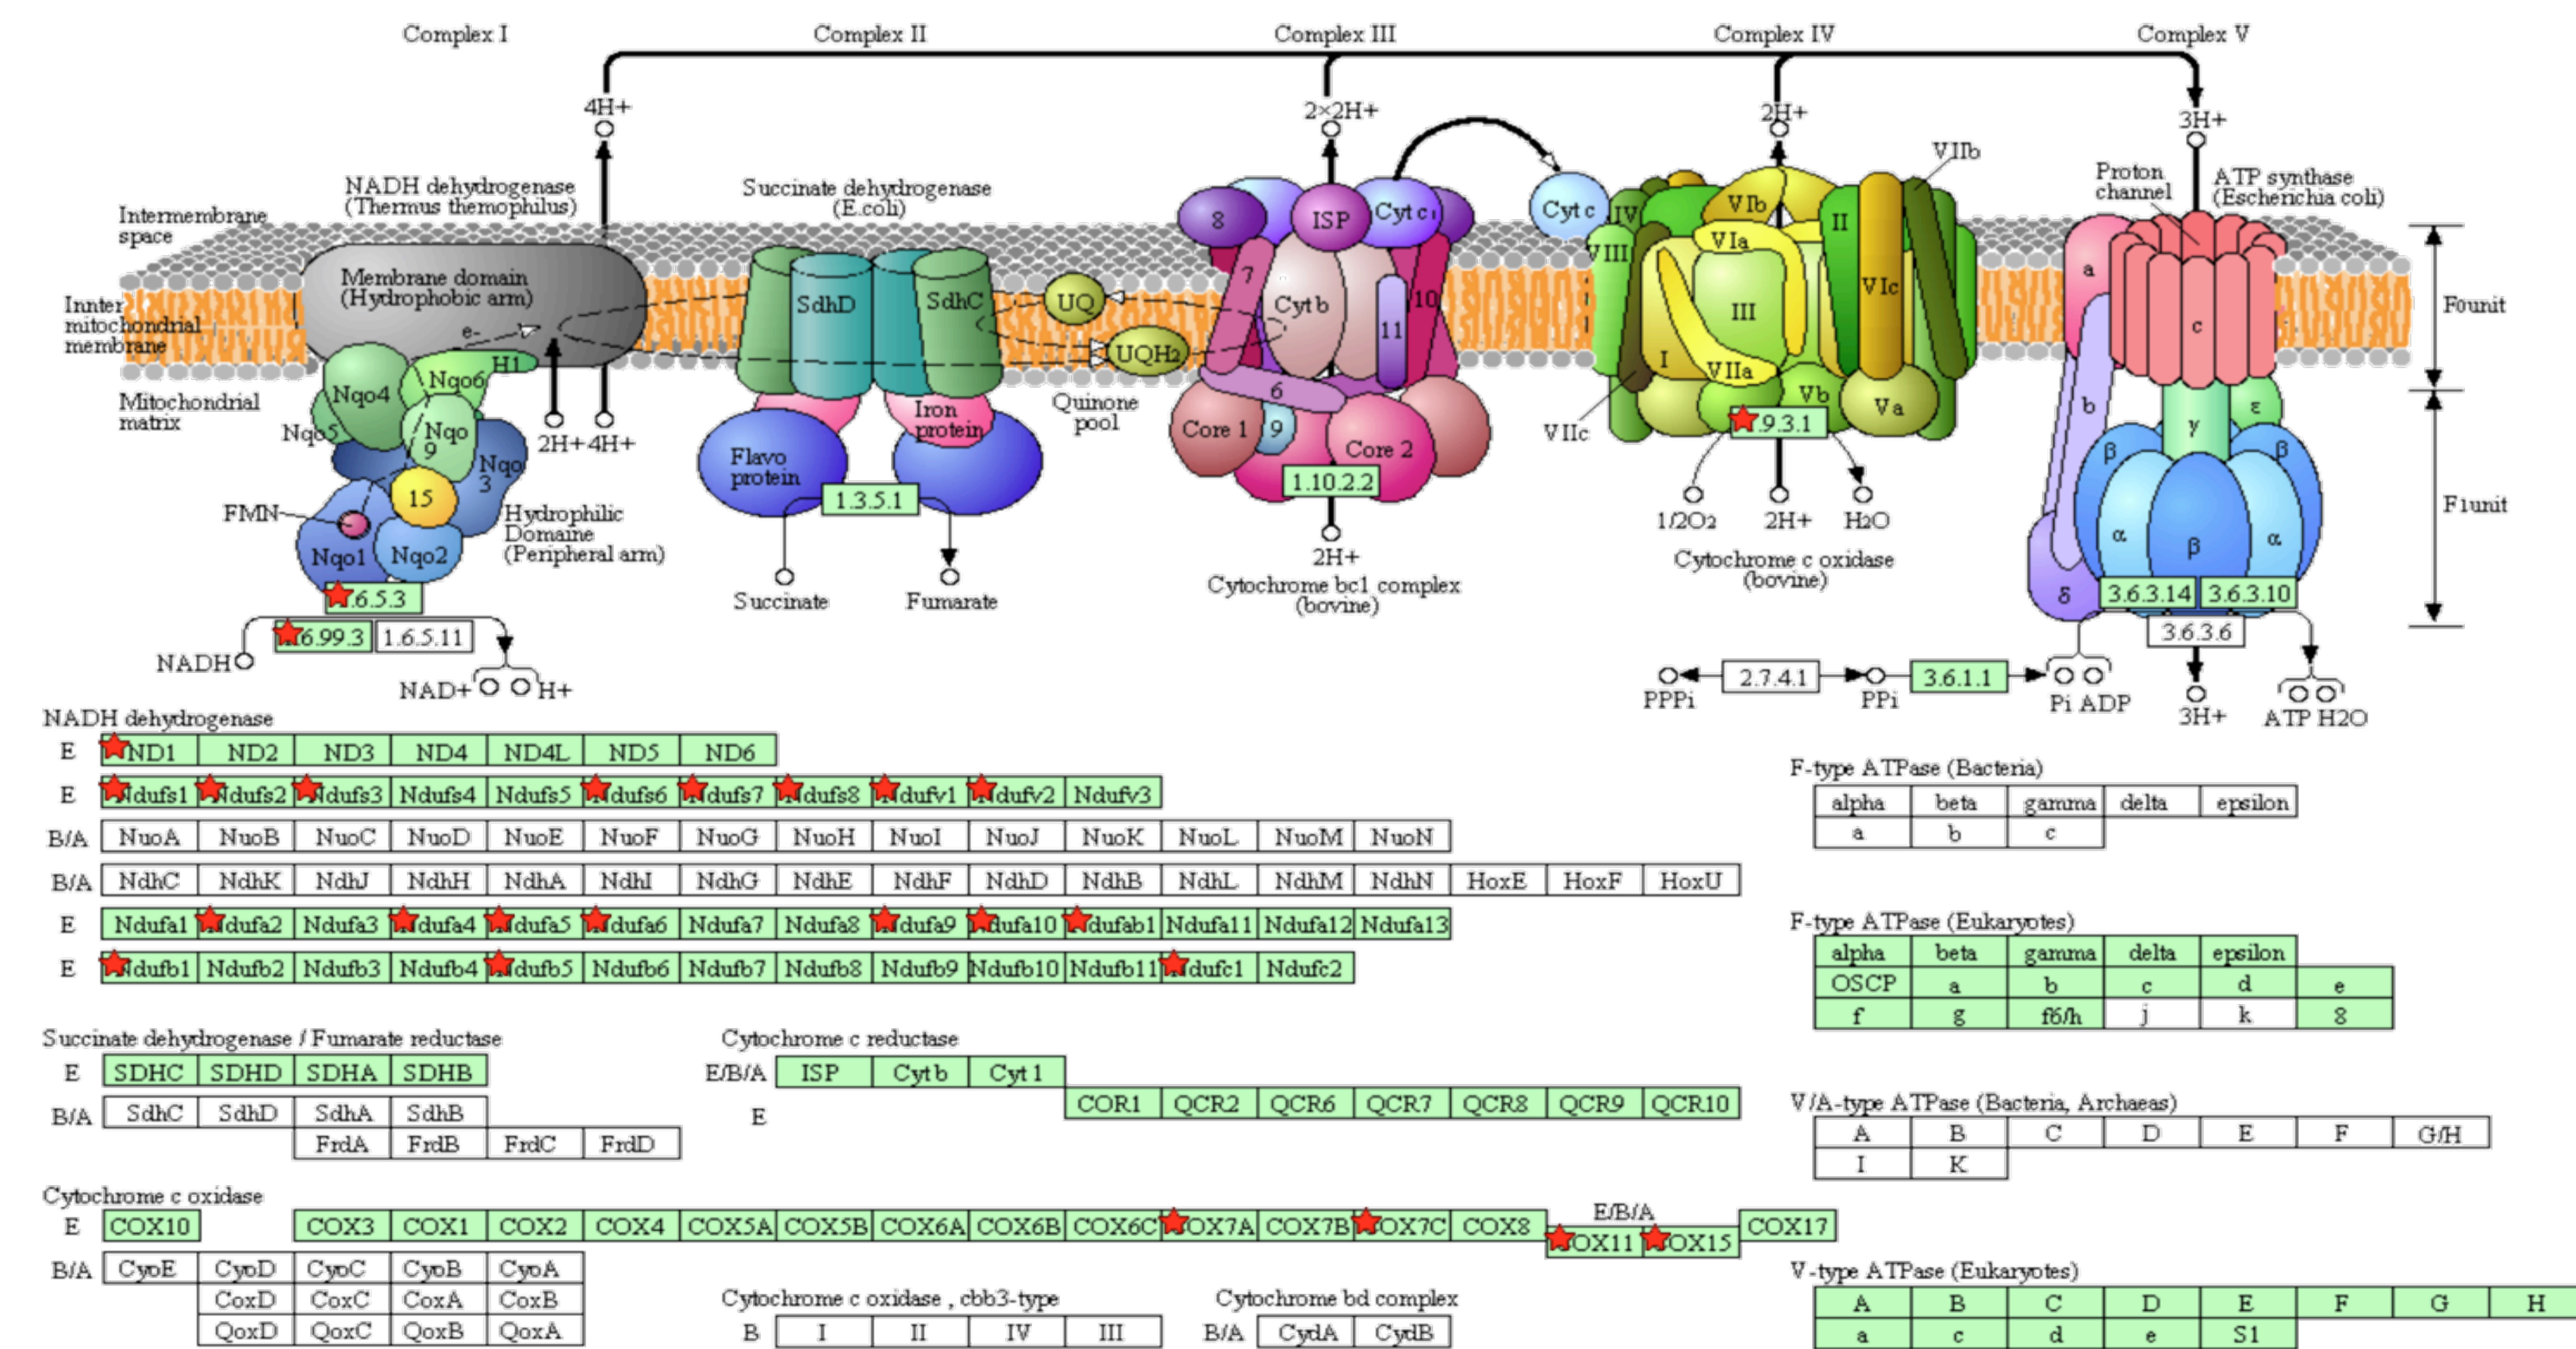



a.

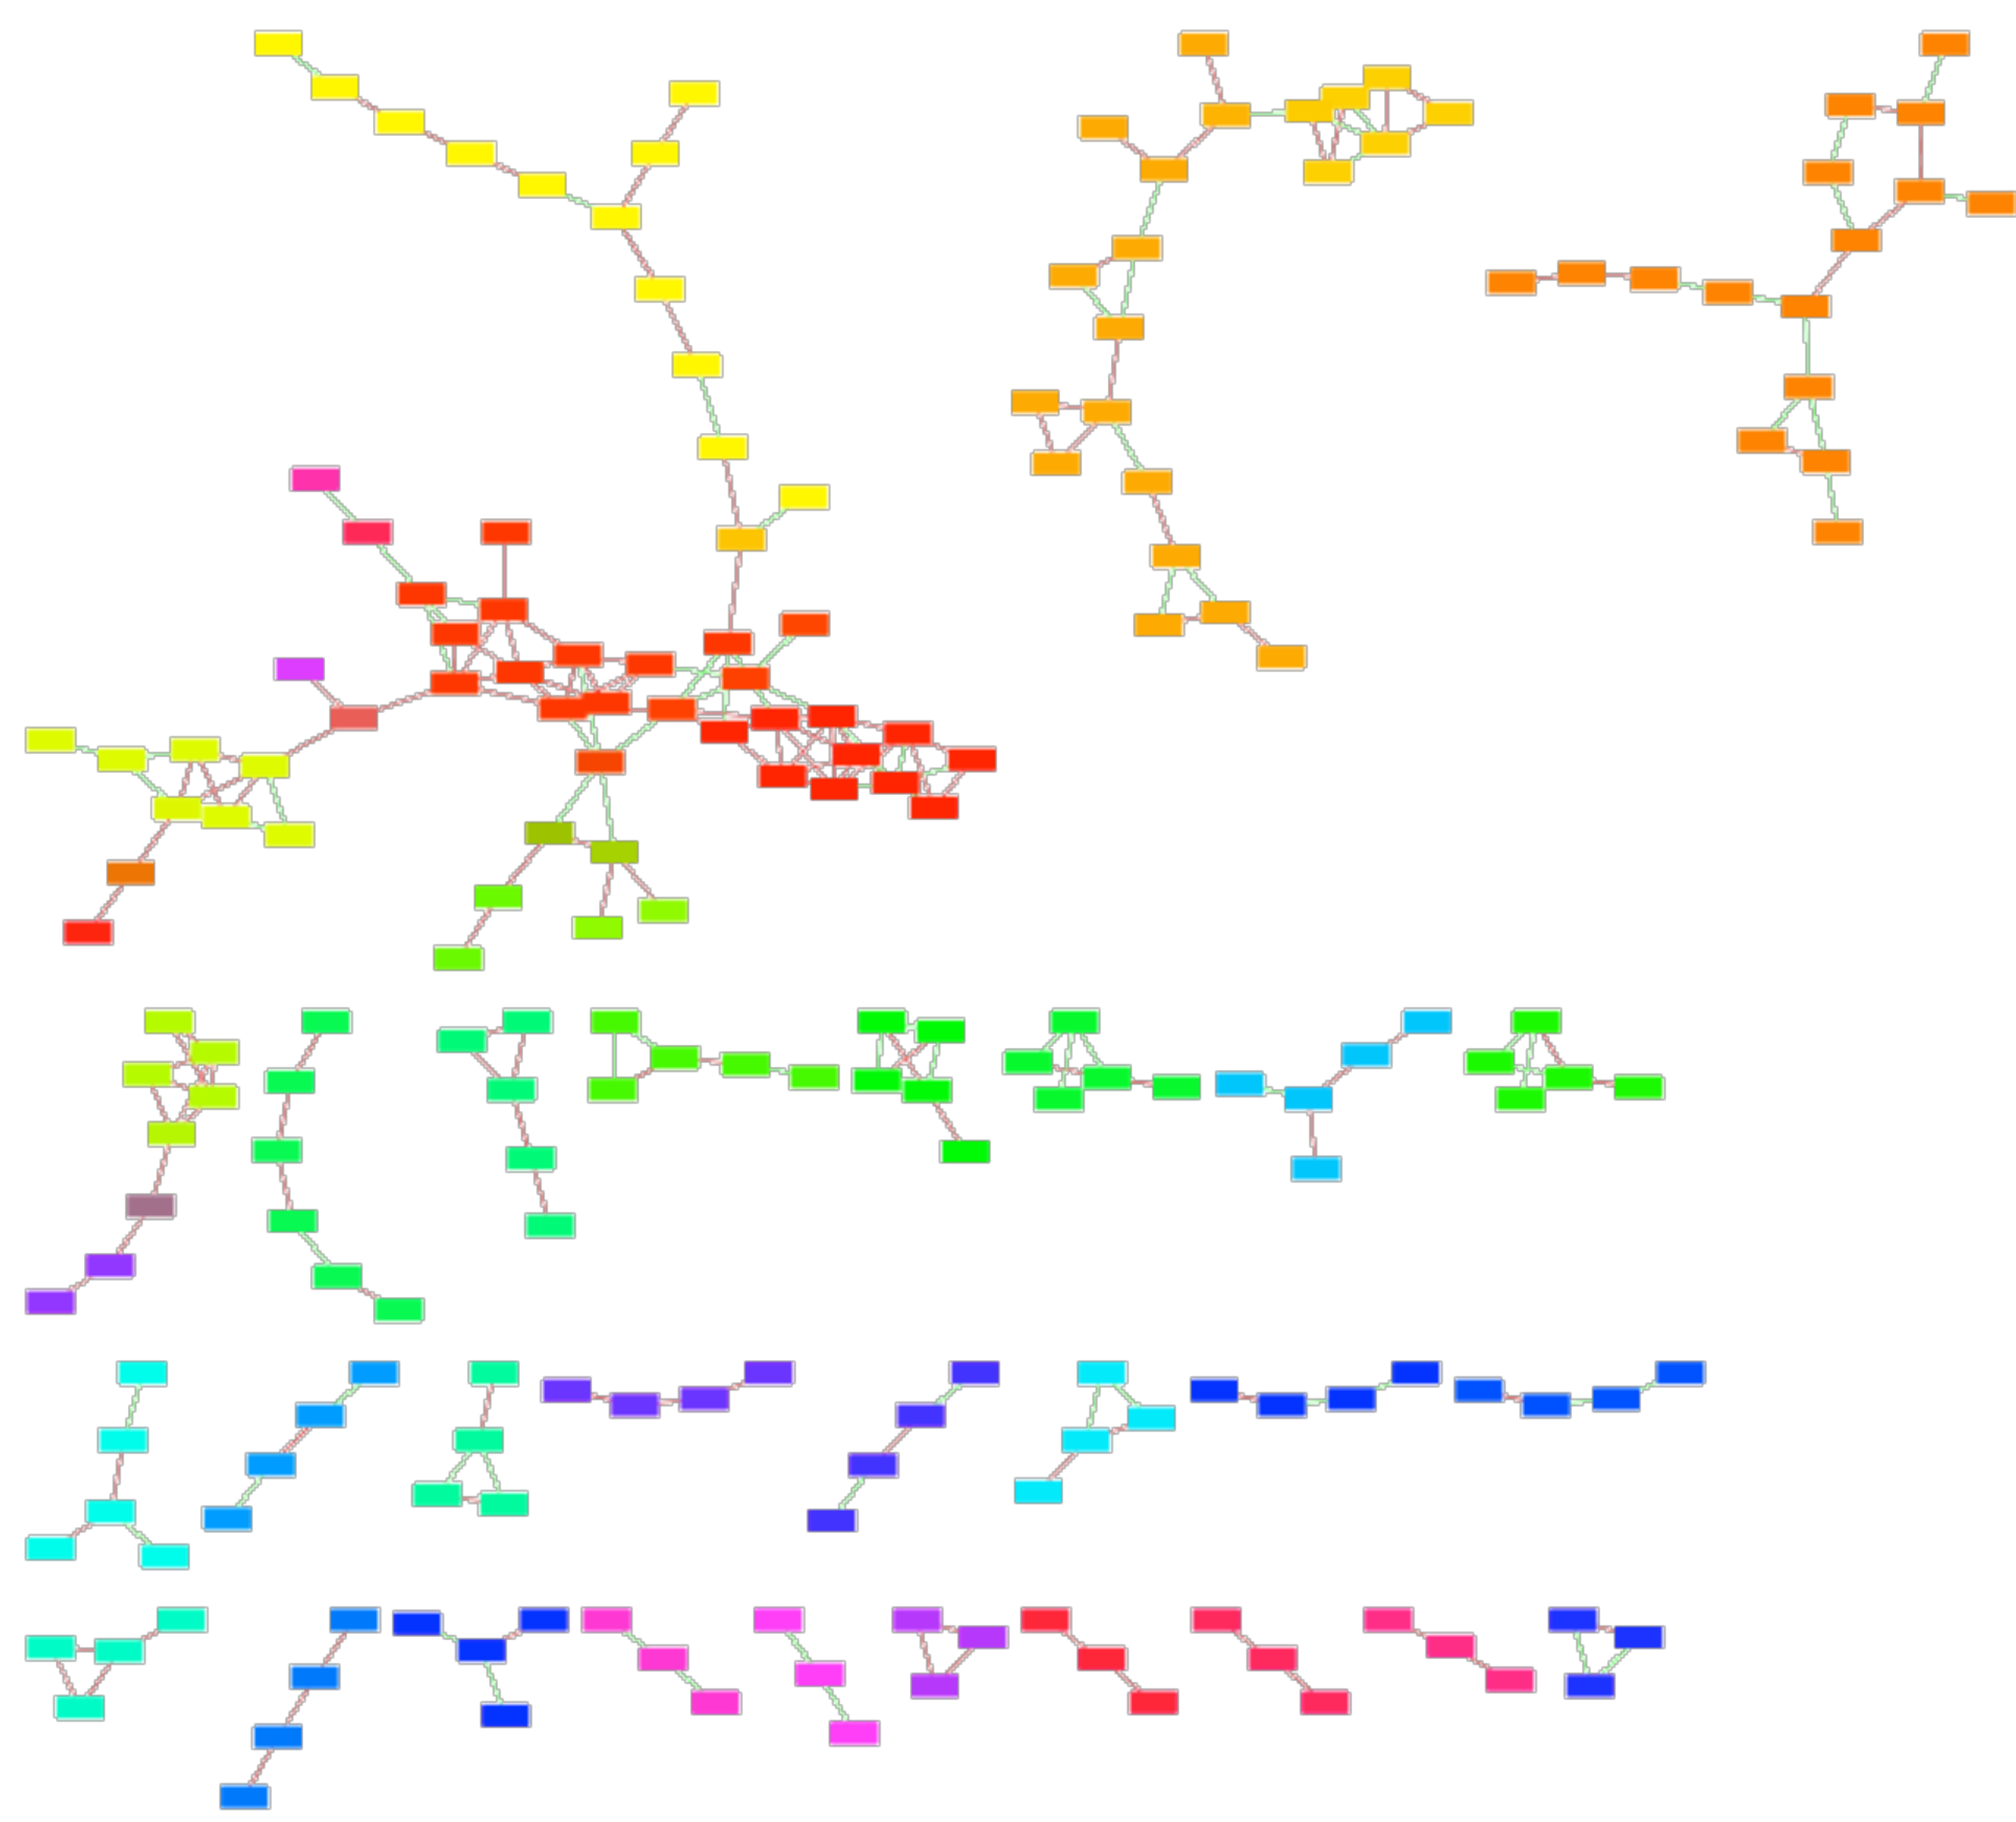

b.

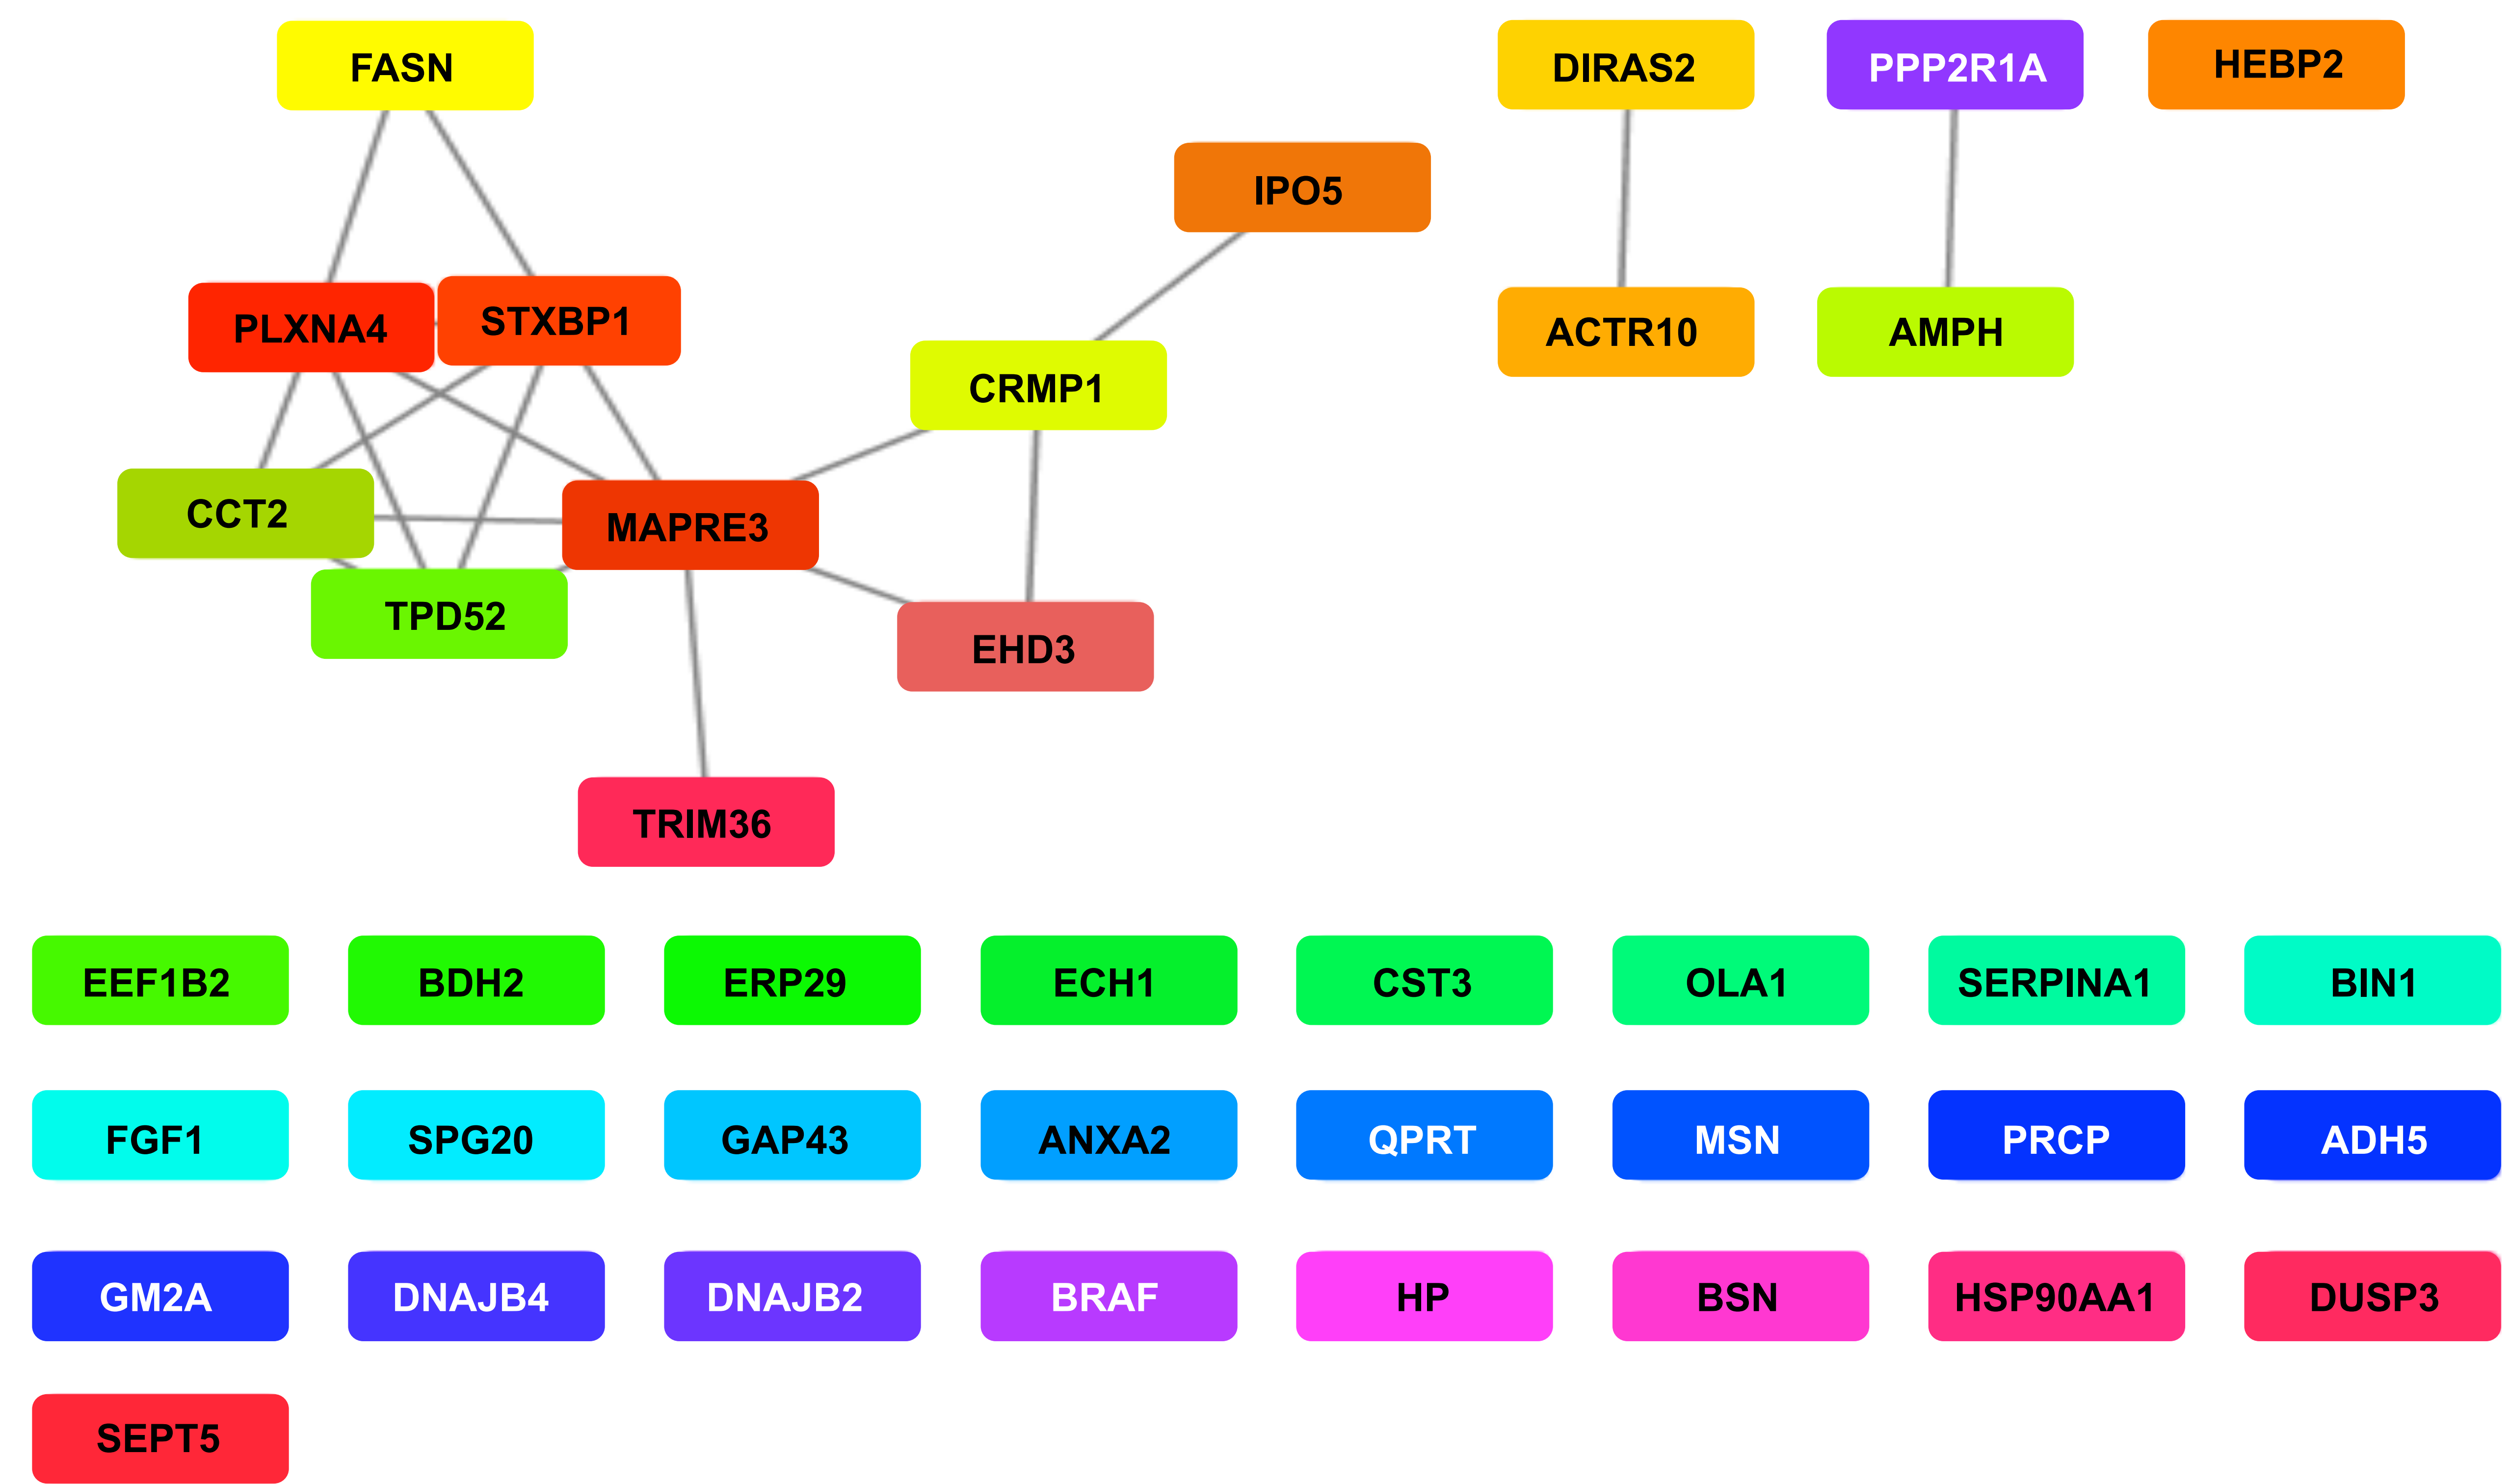

c. Hippocampus

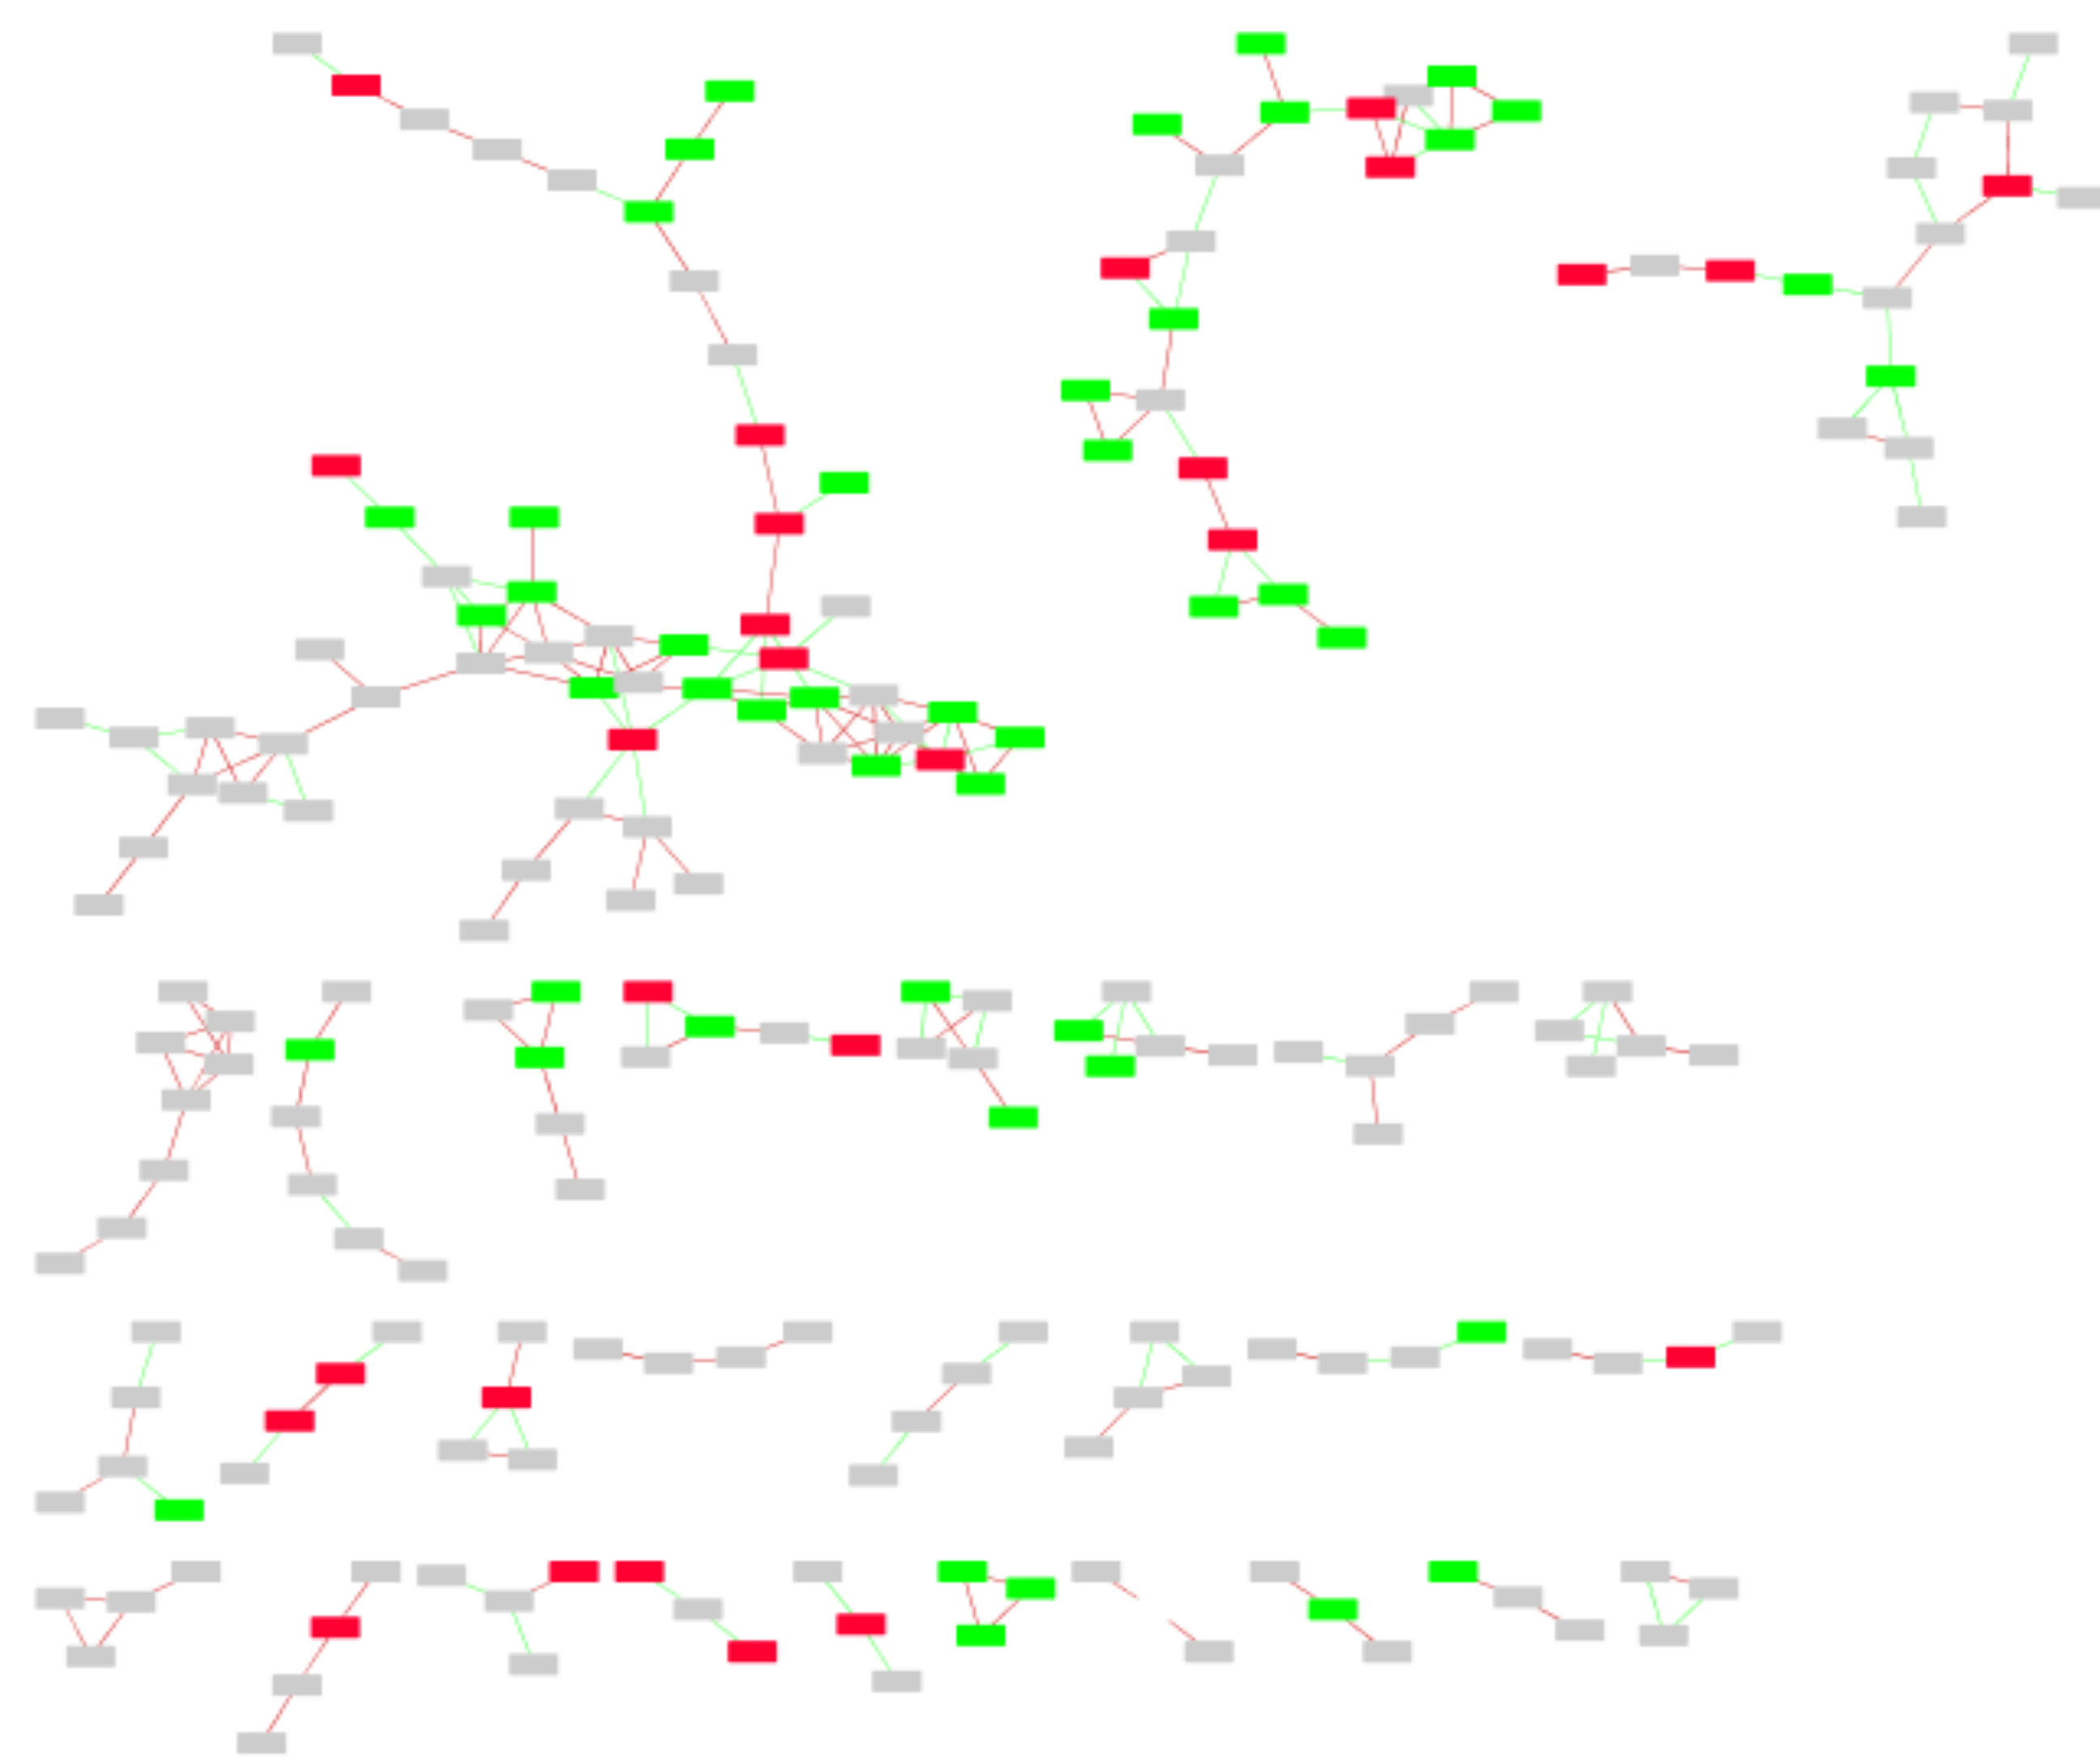

d. Entorhinal cortex

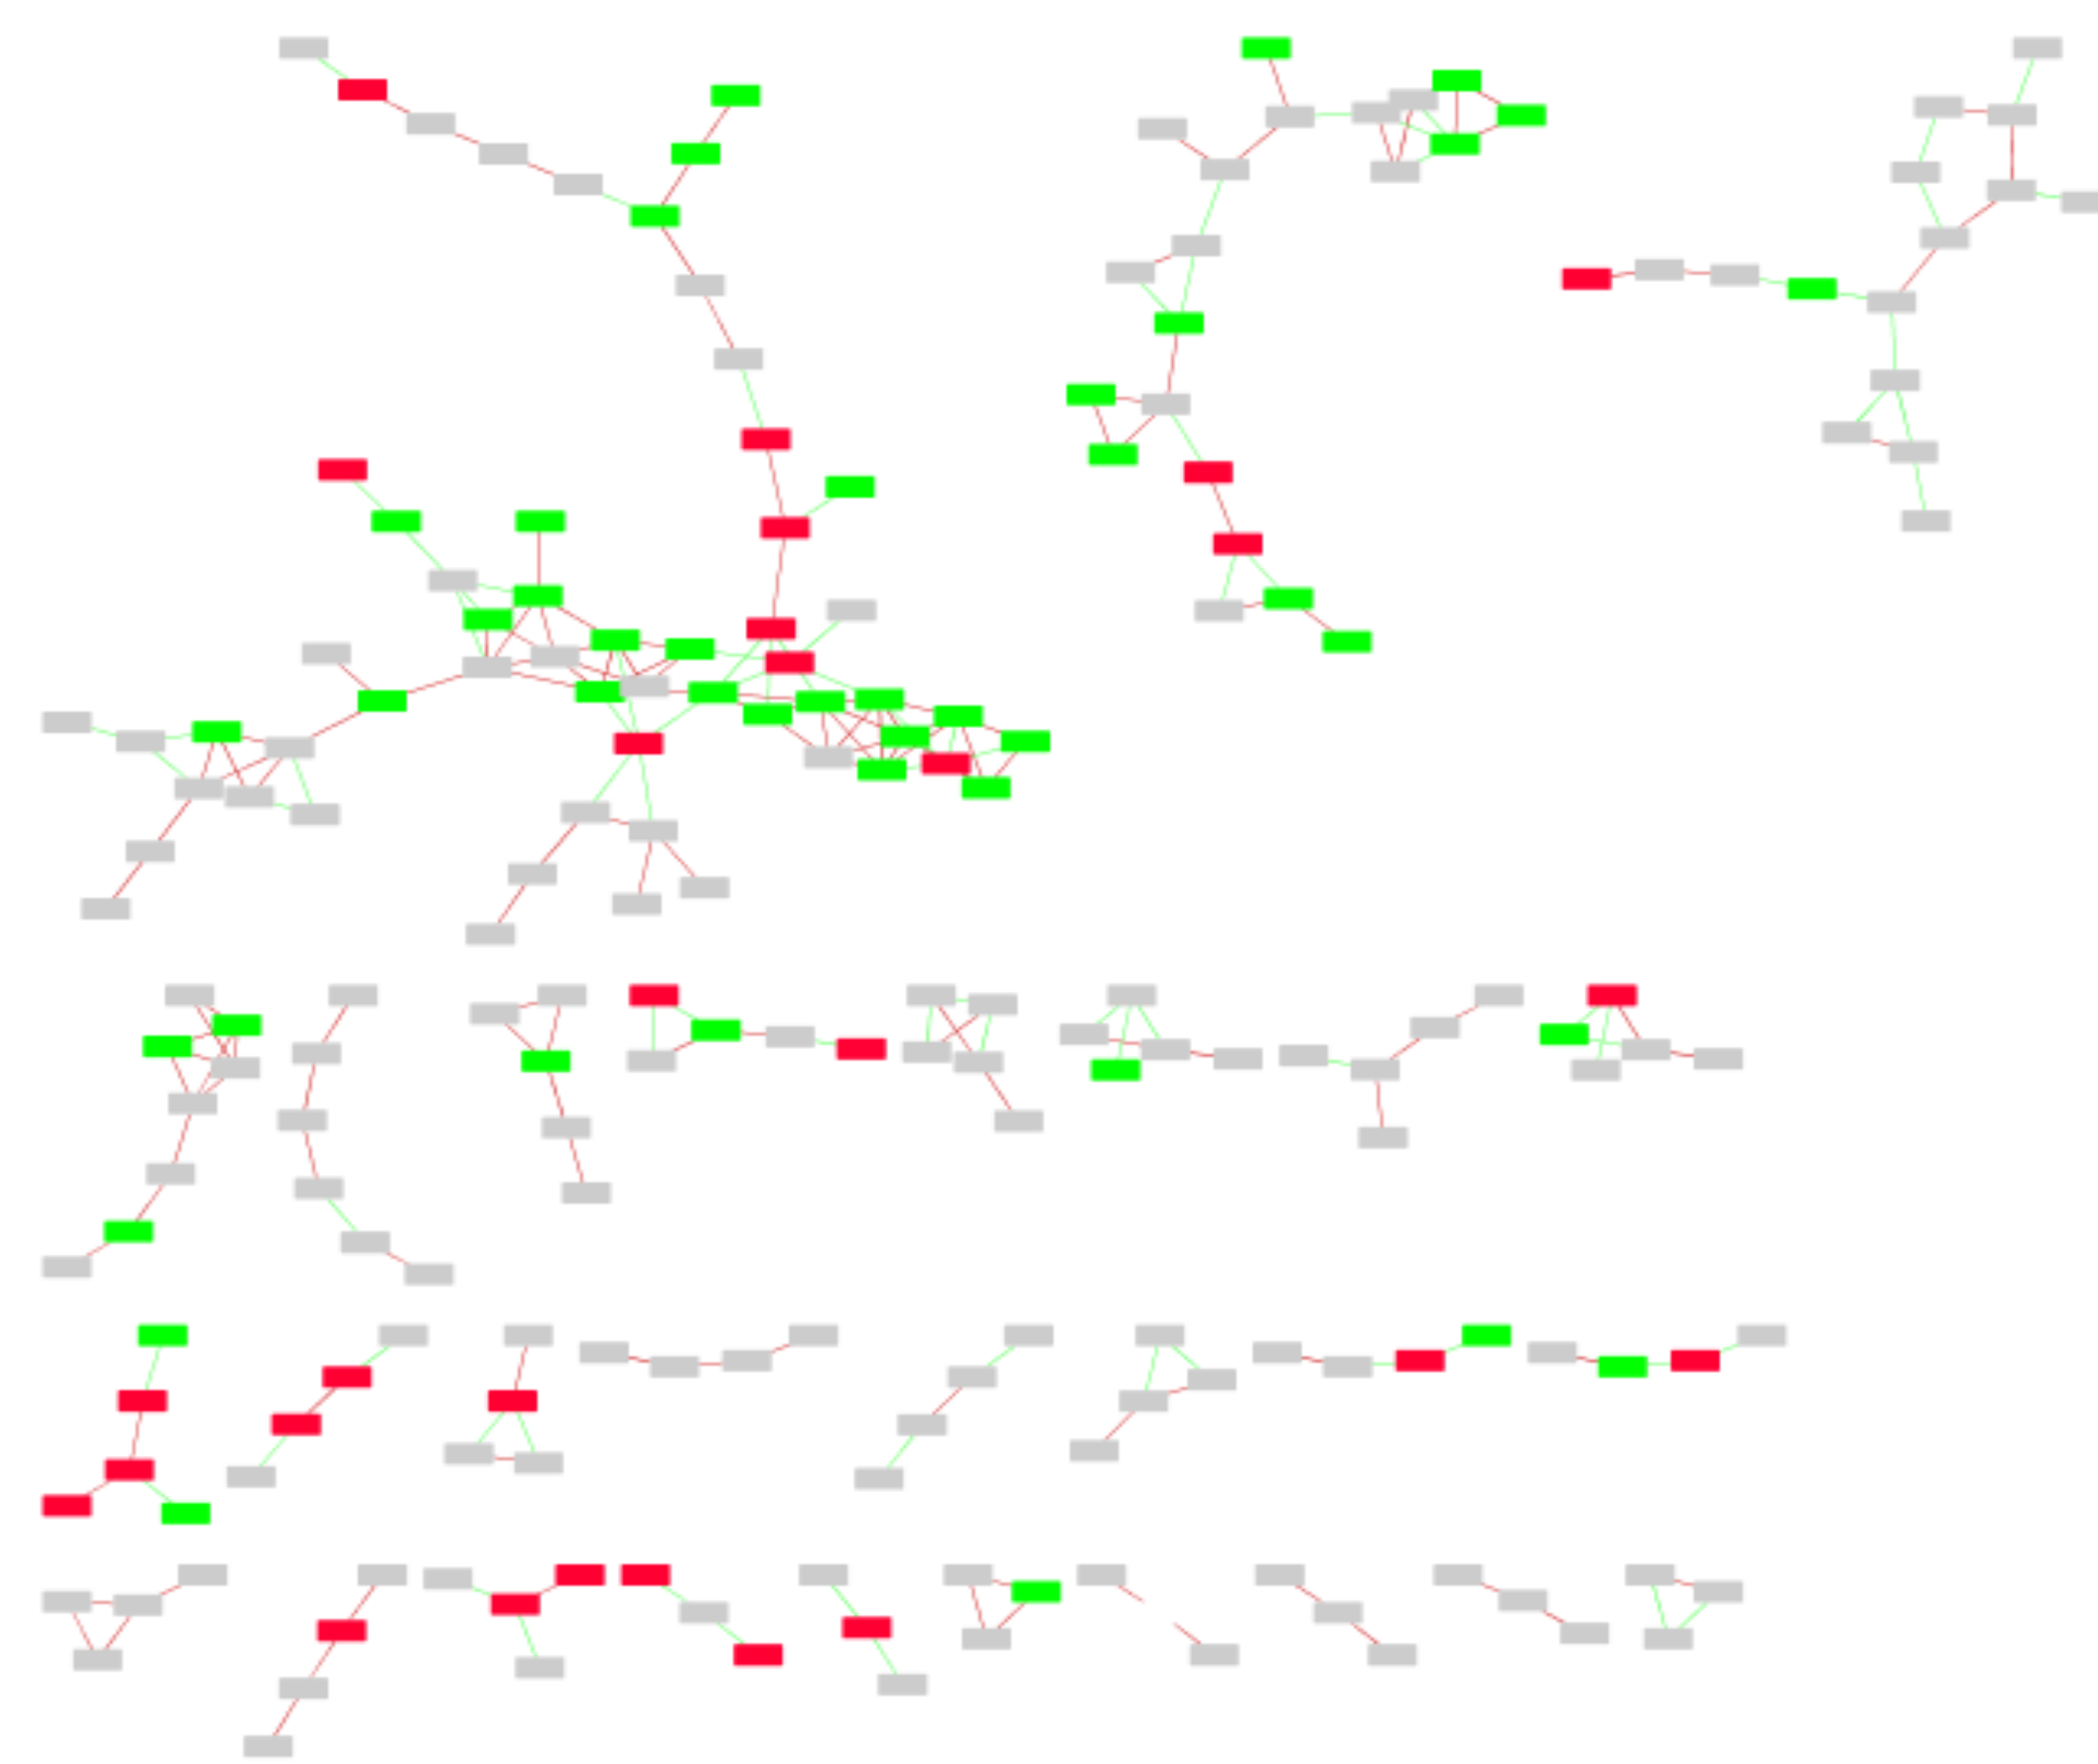

e. Cingulate Gyrus

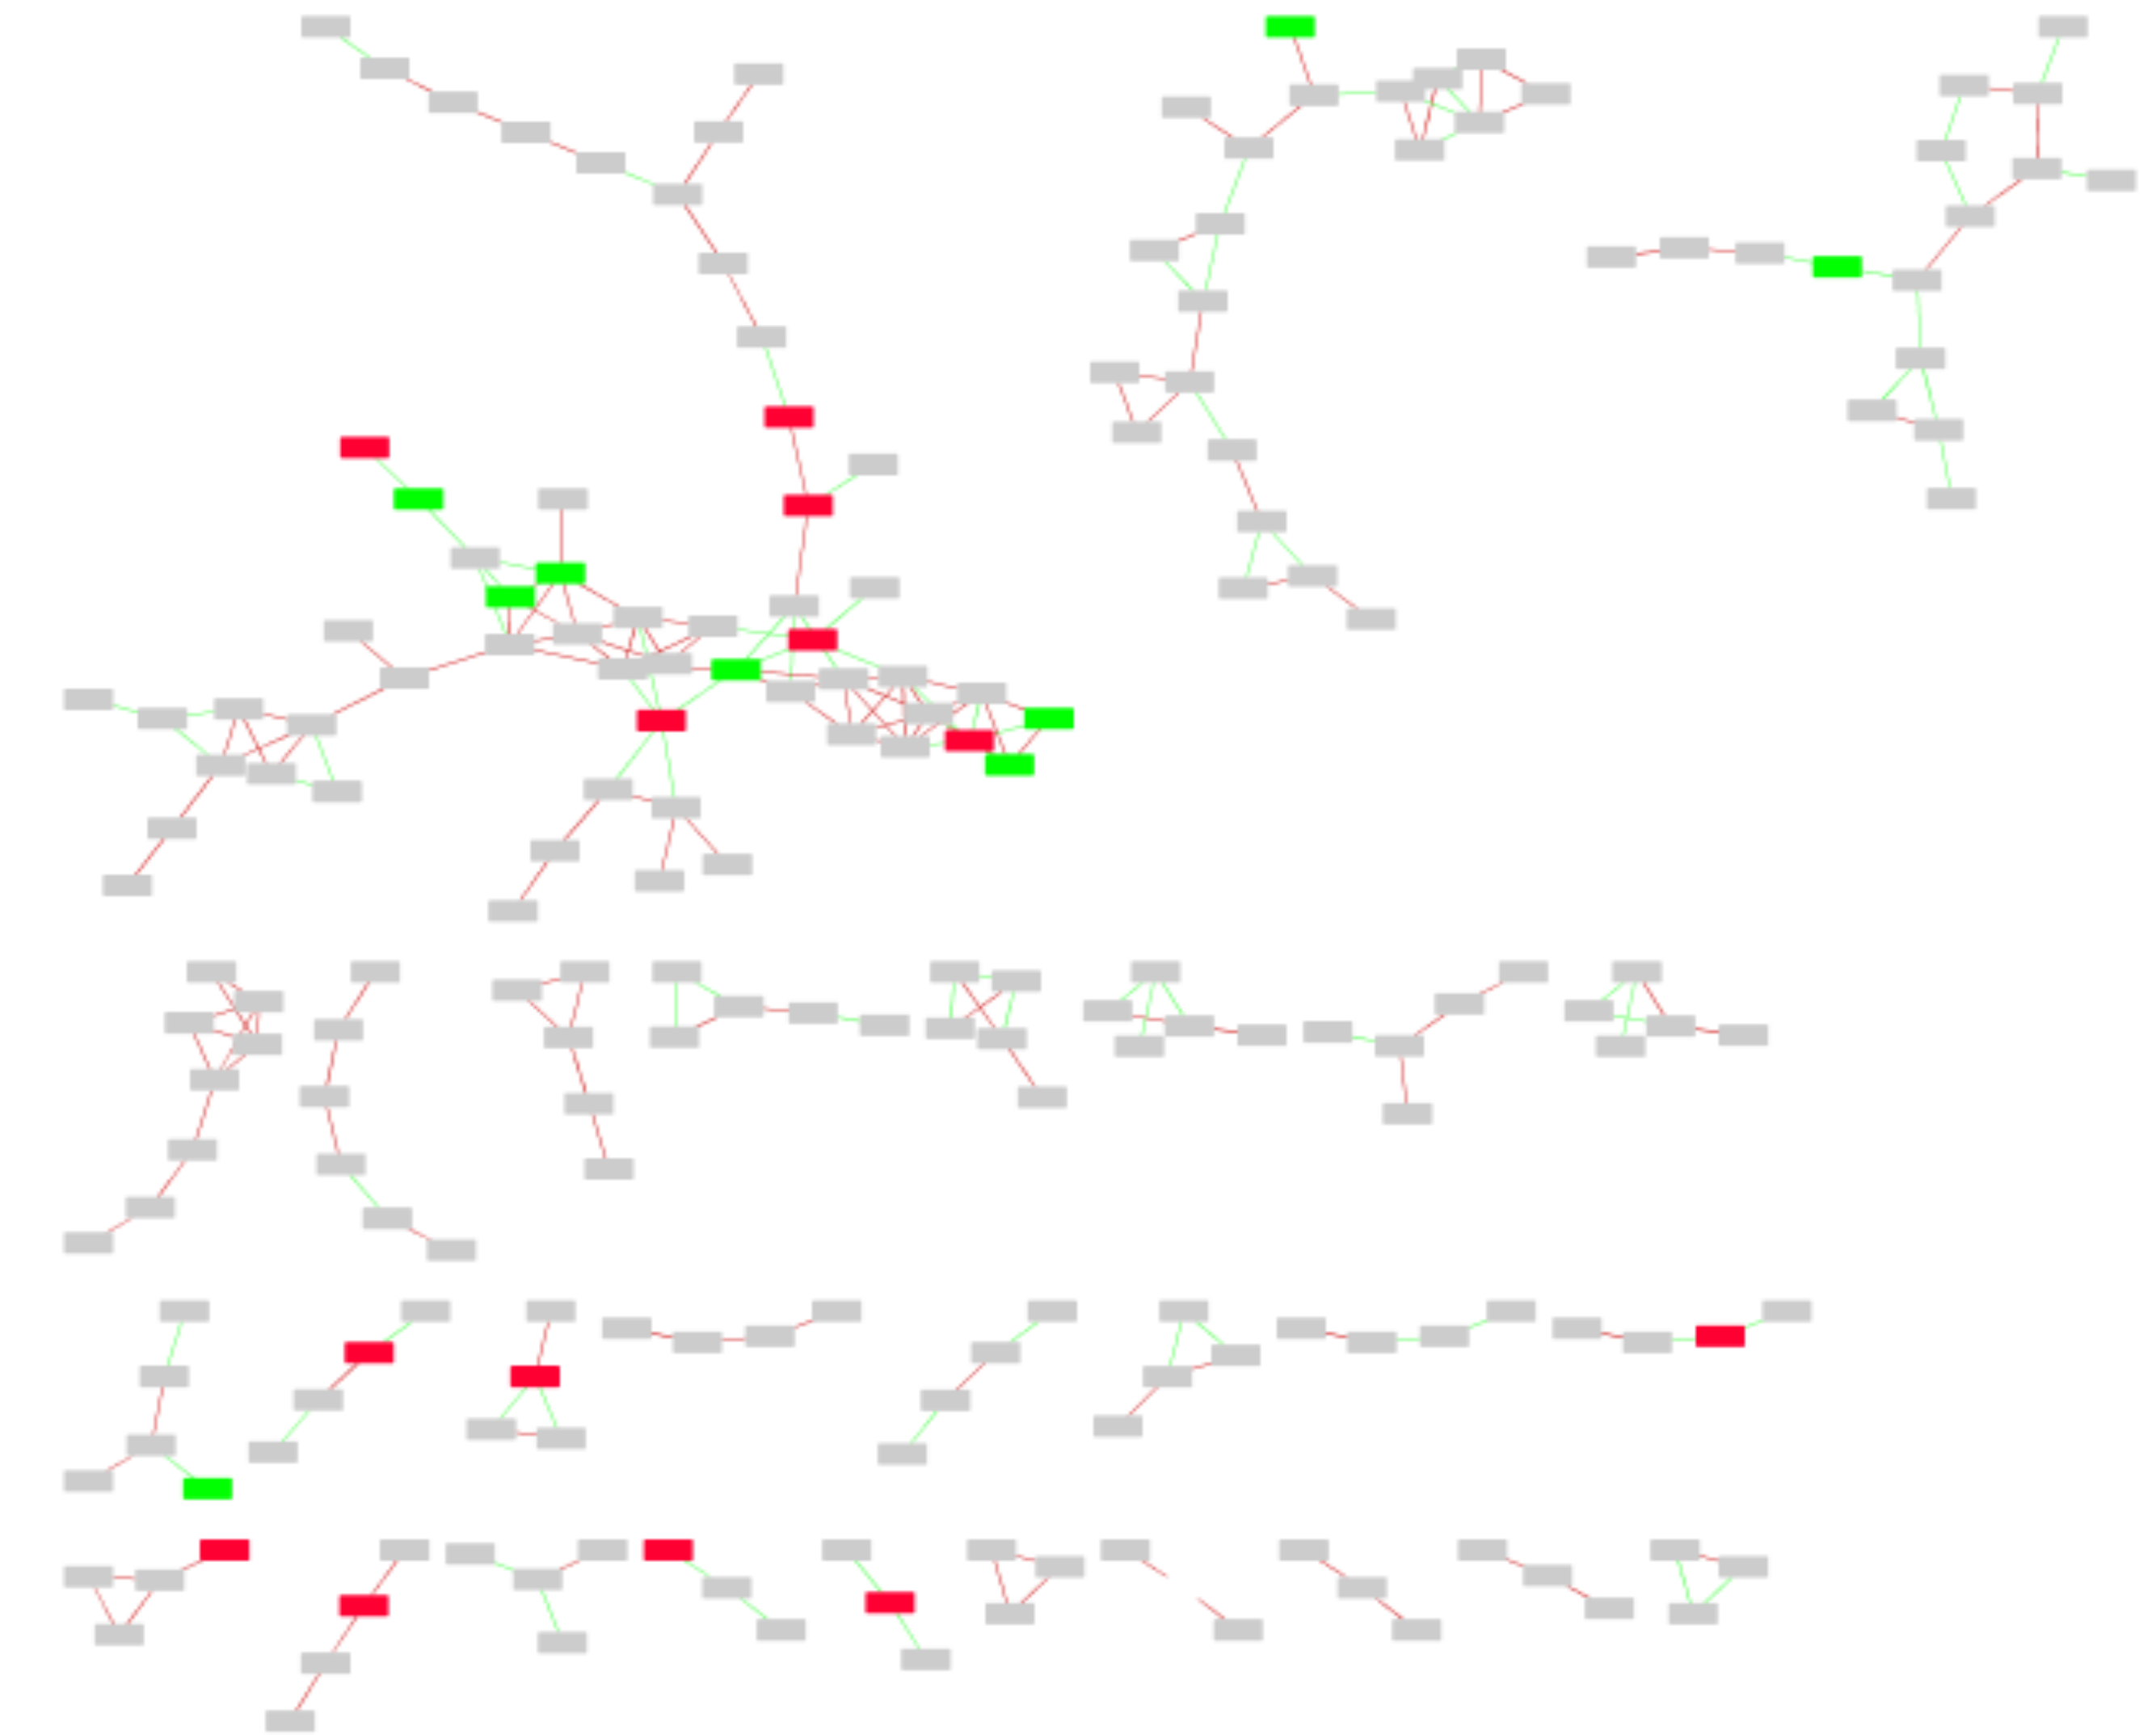

f. Motor Cortex

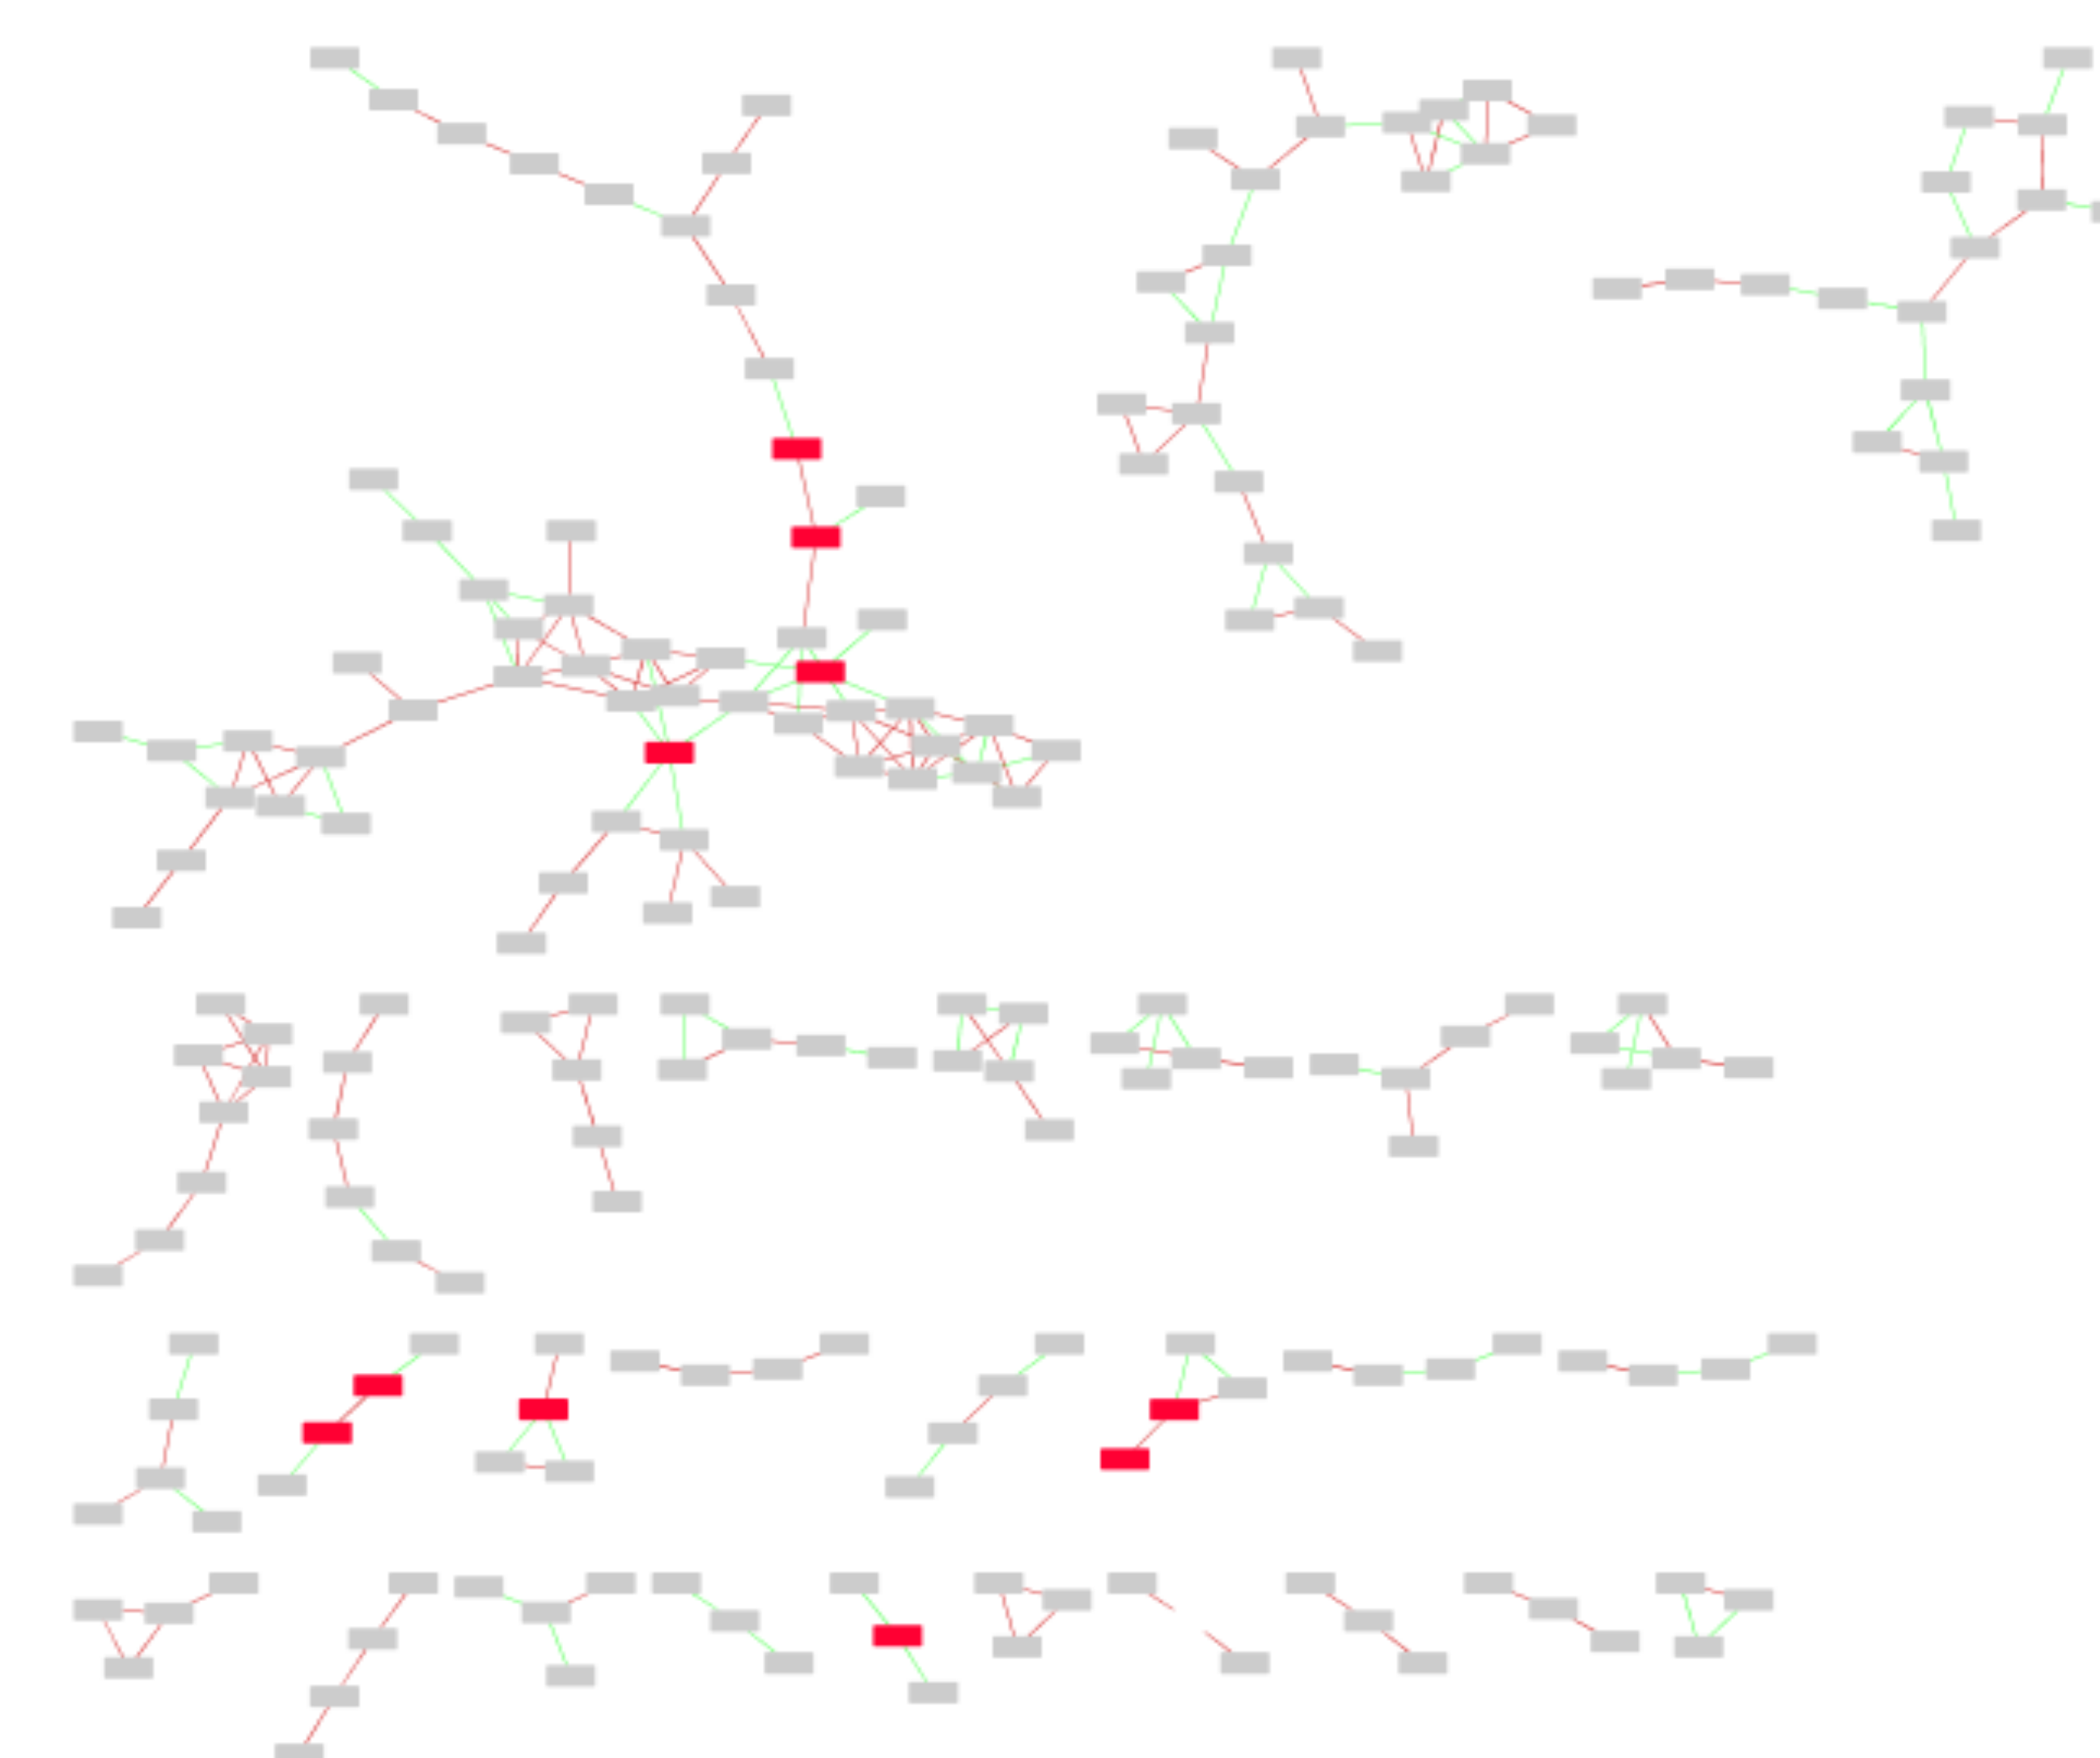

g. Sensory Cortex

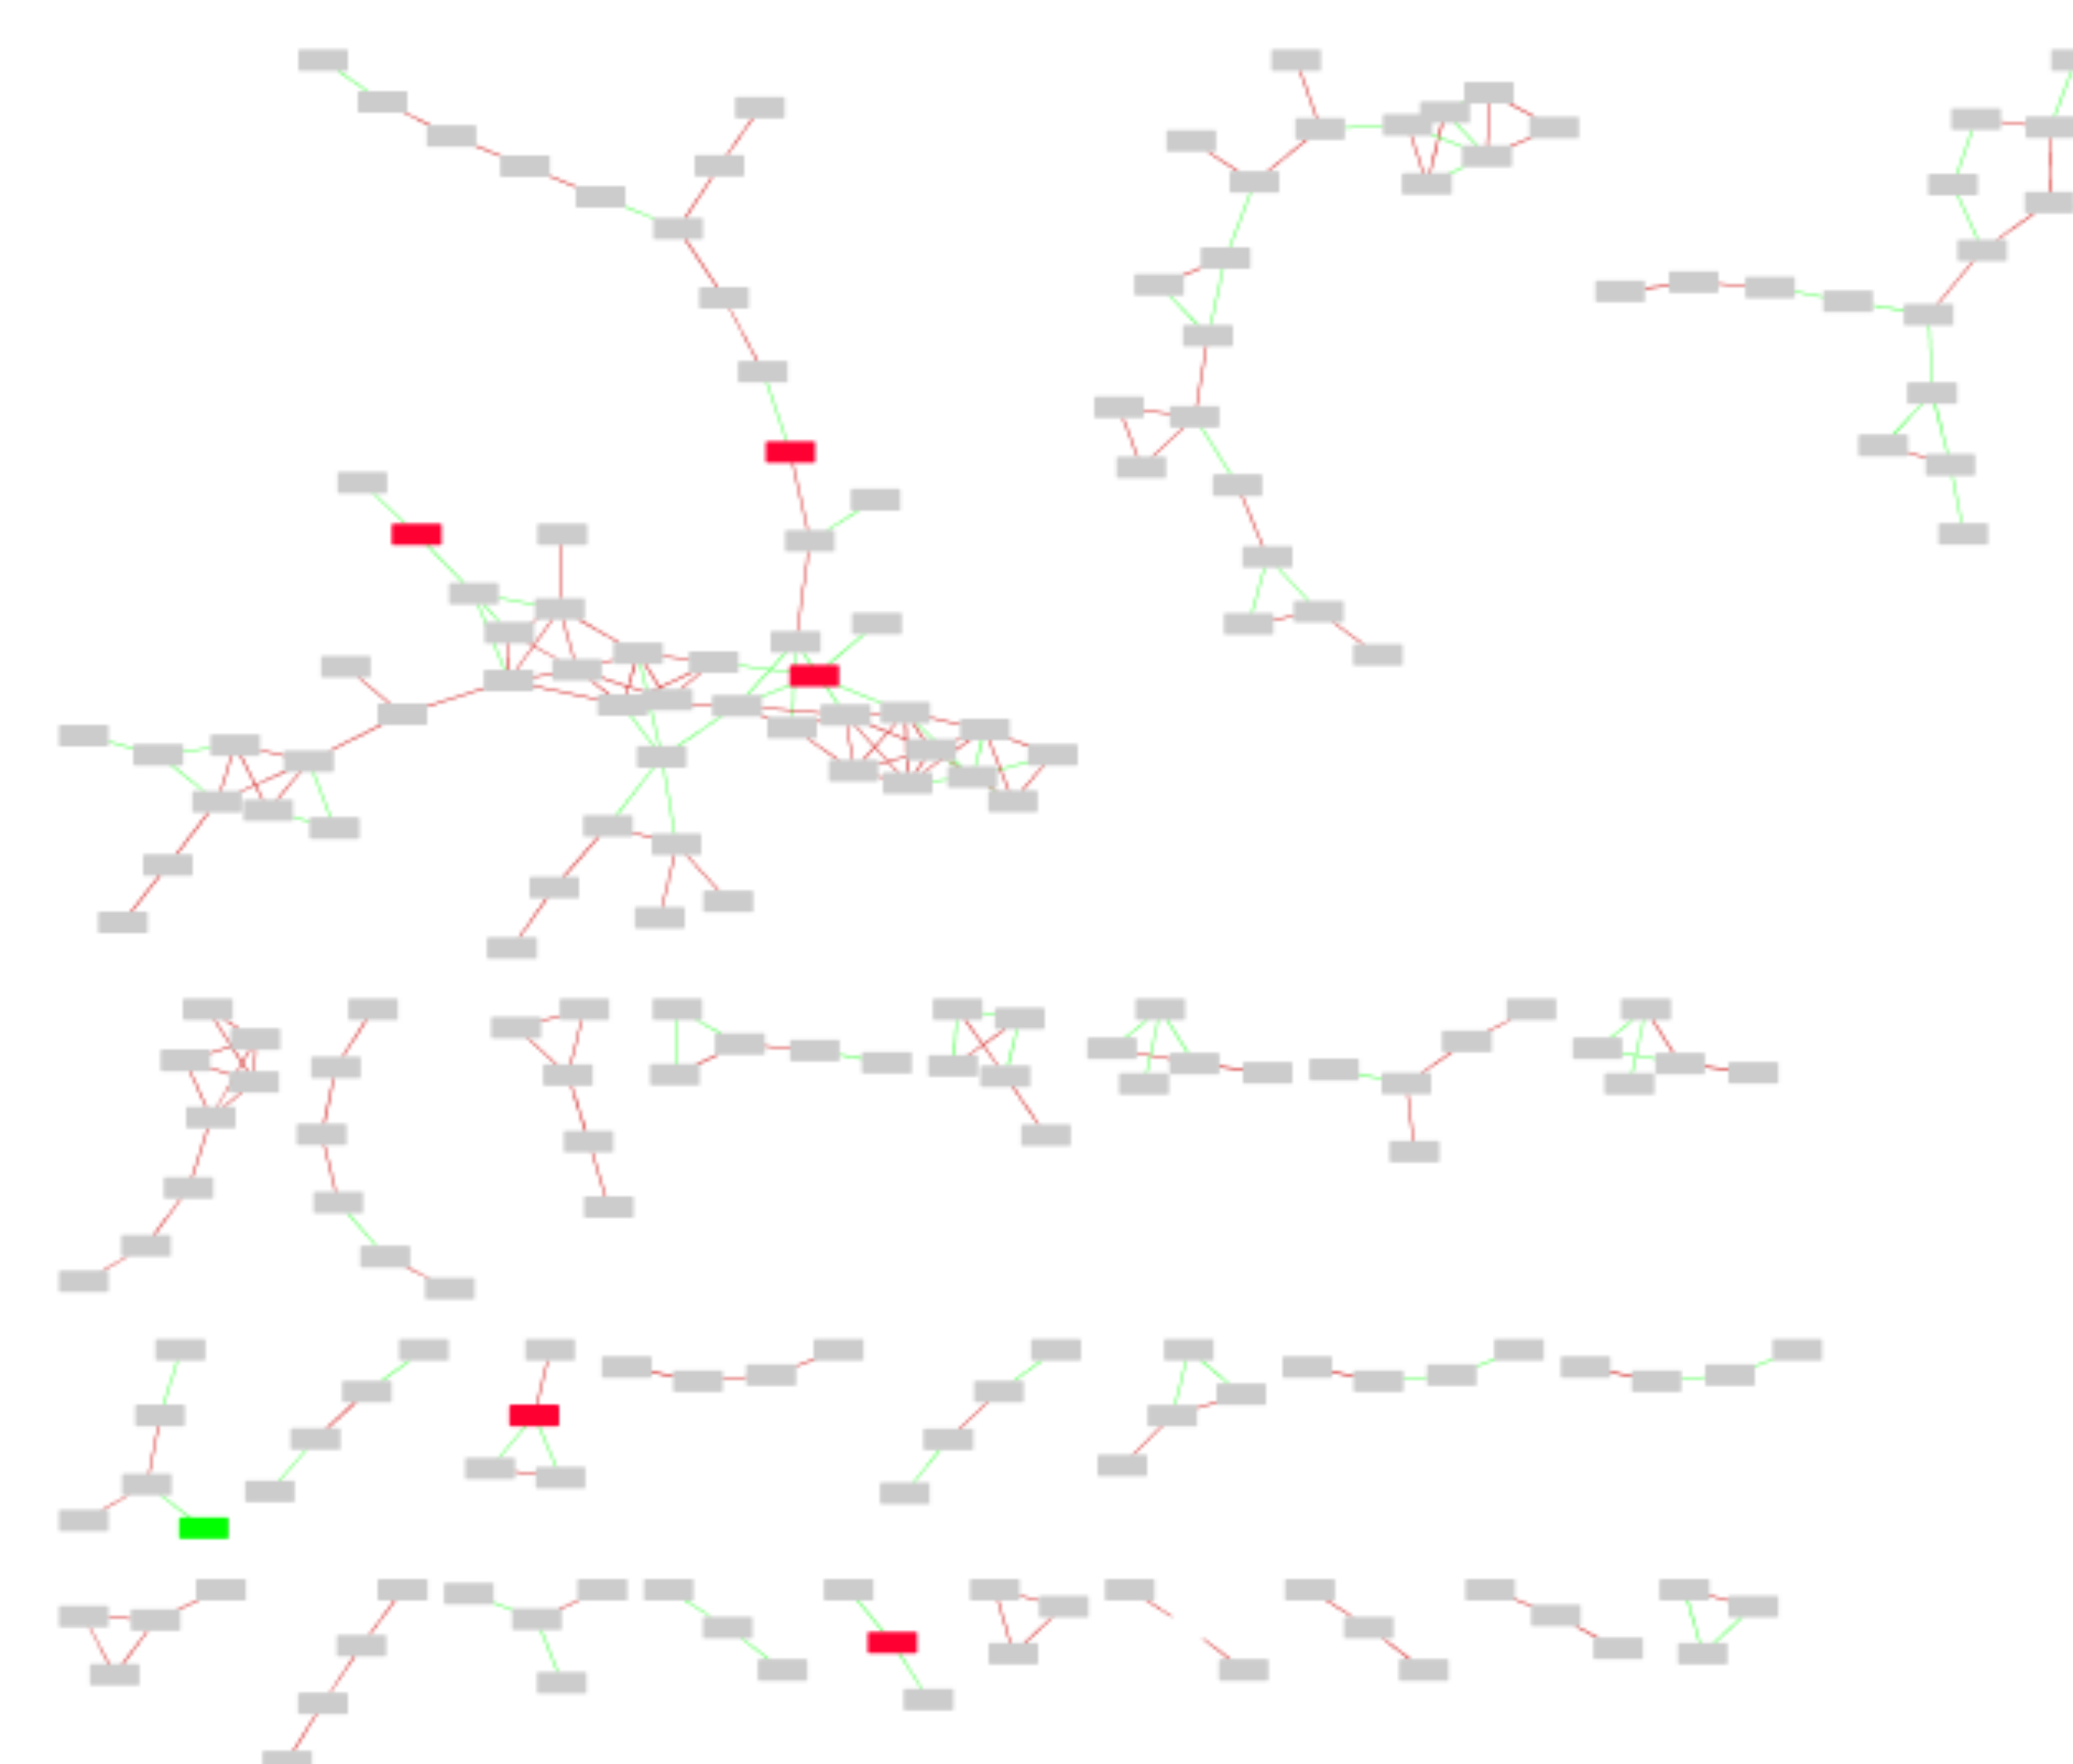

h. Cerebellum

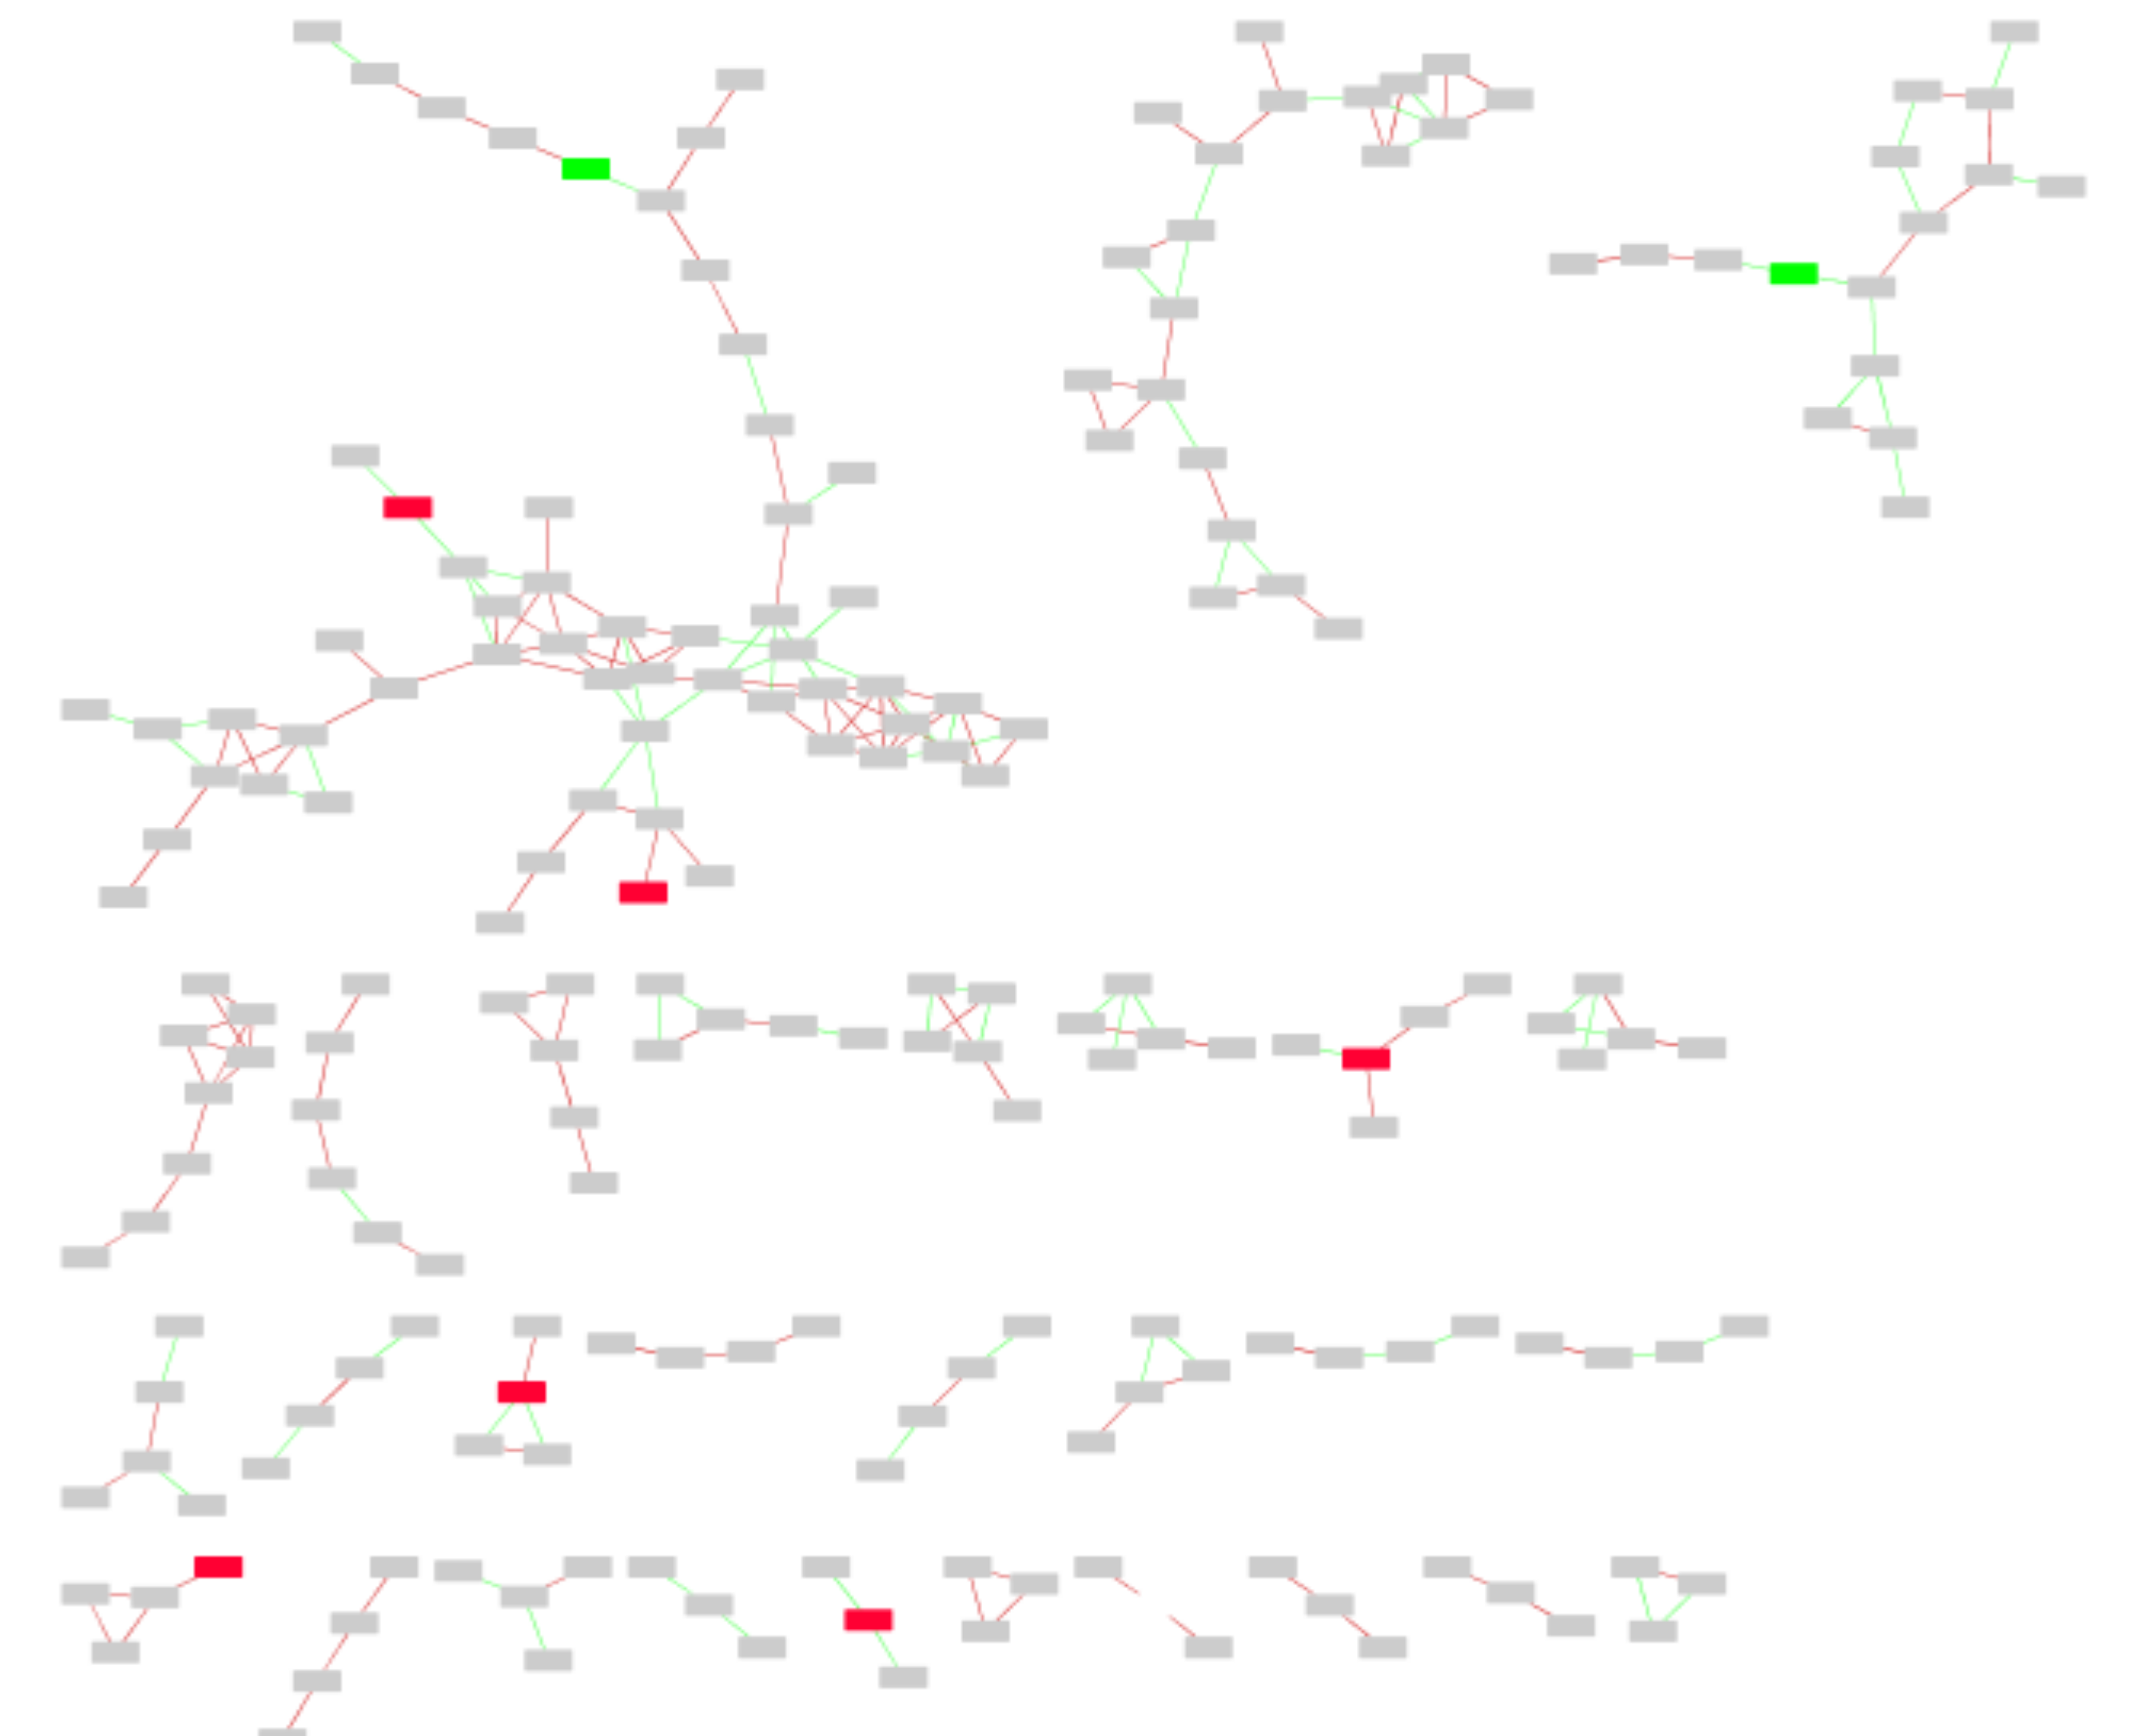

Source: http://biorxiv.org/content/10.1101/283705v1.full.pdf
